# Supplementary material for: Clinical characteristics and outcomes of hyponatraemia associated with oral water intake in adults: a systematic review
Source: PubMed Central journal article supplement — BMJ Open. 2021 Dec 9;11(12):e046539. doi: 10.1136/bmjopen-2020-046539 (PMC8663108; doi:10.1136/bmjopen-2020-046539), 2021-12-09
Supplement: bmjopen-2020-046539supp001.pdf [file bmjopen-2020-046539supp001.pdf]

**SUPPLEMENTAL DATA INDEX****Supplemental Data File 1: Search strategies****Supplemental Data File 2: Summary data extraction table****Supplemental Data File 3: Full data extraction table****Supplemental Data File 4: Excluded studies****Supplemental Data File 5: Full risk of bias assessment**

**Supplemental Data File 1: Search strategies****MEDLINE (OvidSP) 1946-present**

| #  | Searches                                                                       |
|----|--------------------------------------------------------------------------------|
| 1  | Hyponatremia/                                                                  |
| 2  | Water-Electrolyte Imbalance/                                                   |
| 3  | Water-Electrolyte Balance/                                                     |
| 4  | Sodium/bl [Blood]                                                              |
| 5  | hyponatr?emi*.tw                                                               |
| 6  | Electrolyte adj (balance or imbalance).tw                                      |
| 7  | (Sodium or Na) adj2 (low or deficien* or insufficien*).tw                      |
| 8  | (Blood or serum) adj2 (Sodium or Na).tw                                        |
| 9  | Sodium level*.tw                                                               |
| 10 | Or/1-9                                                                         |
| 11 | Body water/                                                                    |
| 12 | Water Intoxication/                                                            |
| 13 | Drinking Water/                                                                |
| 14 | (Water or H2O) adj2 (drink* or consum* or intake* or excess* or intoxicat*).tw |
| 15 | Or/11-14                                                                       |
| 16 | exp Adult/                                                                     |
| 17 | adult*.tw                                                                      |
| 18 | Middle age*.tw                                                                 |
| 19 | Aged.tw                                                                        |
| 20 | Elder* or geriatric*.tw                                                        |
| 21 | old* adj (person* or people).tw                                                |

|    |                  |
|----|------------------|
| 22 | or/16-20         |
| 23 | 10 and 15 and 22 |

**EMBASE (OvidSP 1947-present)**

| #  | Searches                                                                       |
|----|--------------------------------------------------------------------------------|
| 1  | Hyponatremia/                                                                  |
| 2  | abnormally low substrate concentration in blood/                               |
| 3  | electrolyte disturbance/                                                       |
| 4  | electrolyte balance/                                                           |
| 5  | sodium/                                                                        |
| 6  | sodium blood level/                                                            |
| 7  | electrolyte blood level/                                                       |
| 8  | Hyponatr?emia*.tw                                                              |
| 9  | (Electrolyte adj (balance or imbalance)).tw                                    |
| 10 | ((Sodium or Na) adj2 (low or deficien* or insufficien*)).tw                    |
| 11 | ((Blood or serum) adj2 (Sodium or Na)).tw                                      |
| 12 | Sodium level*.tw                                                               |
| 13 | Or/1-12                                                                        |
| 14 | body water/                                                                    |
| 15 | exp water intoxication/                                                        |
| 16 | drinking water/                                                                |
| 17 | (Water or H2O) adj2 (drink* or consum* or intake* or excess* or intoxicat*).tw |
| 18 | or/14-17                                                                       |
| 19 | exp adult/                                                                     |

|    |                                    |
|----|------------------------------------|
| 20 | Adult*.tw                          |
| 21 | Middle age*.tw                     |
| 22 | Aged.tw                            |
| 23 | Elder* or geriatric*.tw            |
| 24 | (old* adj (person* or people*)).tw |
| 25 | or/19-24                           |
| 26 | 13 and 18 and 25                   |

### CINAHL (EBSCO 1982-present)

| #   | Searches                                                         |
|-----|------------------------------------------------------------------|
| S1  | (MH "Hyponatremia")                                              |
| S2  | (MH "Fluid-Electrolyte Imbalance")                               |
| S3  | (MH "Fluid-Electrolyte Balance")                                 |
| S4  | (MH "Fluid and Electrolytes (Iowa NOC)")                         |
| S5  | (MH "Electrolyte and Acid-Base Balance (Iowa NOC)")              |
| S6  | (MH "Sodium/BL")                                                 |
| S7  | TX hyponatr#emia                                                 |
| S8  | TX Electrolyte N1 (balance or imbalance)                         |
| S9  | TX (Sodium or Na) N2 (low or deficien* or insufficien*)          |
| S10 | TX (Blood or serum) N2 (Sodium or Na)                            |
| S11 | TX "Sodium level" or "sodium levels"                             |
| S12 | S1 or S2 or S3 or S4 or S5 or S6 or S7 or S8 or S9 or S10 or S11 |
| S13 | (MH "Body Water")                                                |
| S14 | (MH "Water Intoxication")                                        |

|     |                                                         |
|-----|---------------------------------------------------------|
| S15 | TX (water) N2 (drink* or consum* or intake* or excess*) |
| S16 | S13 or S14 or S15                                       |
| S17 | (MH “Adult+”)                                           |
| S18 | TX (“elderly”)                                          |
| S19 | TX (old*) N1 (person* or People)                        |
| S20 | TX (middle aged or middle age*)                         |
| S21 | TX (“aged”)                                             |
| S22 | TX Adult*                                               |
| S23 | S17 or S18 or S19 or S20 or S21 or S22                  |
| S24 | S12 and S16 and S23                                     |

#### Cochrane Library (OvidSP 1991-present)

| #  | Searches                                                  |
|----|-----------------------------------------------------------|
| 1  | Hyponatremia/                                             |
| 2  | Water-Electrolyte Imbalance/                              |
| 3  | Water-Electrolyte Balance/                                |
| 4  | Sodium/bl [Blood]                                         |
| 5  | hyponatr?emi*.tw                                          |
| 6  | Electrolyte adj (balance or imbalance).tw                 |
| 7  | (Sodium or Na) adj2 (low or deficien* or insufficien*).tw |
| 8  | (Blood or serum) adj2 (Sodium or Na).tw                   |
| 9  | Sodium level*.tw                                          |
| 10 | Or/1-9                                                    |
| 11 | Body water/                                               |

|    |                                                                                |
|----|--------------------------------------------------------------------------------|
| 12 | Water Intoxication/                                                            |
| 13 | Drinking Water/                                                                |
| 14 | (Water or H2O) adj2 (drink* or consum* or intake* or excess* or intoxicat*).tw |
| 15 | Or/11-14                                                                       |
| 16 | exp Adult/                                                                     |
| 17 | adult*.tw                                                                      |
| 18 | Middle age*.tw                                                                 |
| 19 | Aged.tw                                                                        |
| 20 | Elder* or geriatric*.tw                                                        |
| 21 | old* adj (person* or people).tw                                                |
| 22 | or/16-20                                                                       |
| 23 | 10 and 15 and 22                                                               |

## Supplemental Data File 2: Summary data extraction table

| Case # | Source               |              | Study type                 | Patients |             |              |                                                                                  | Symptoms                         |             | Fluid                                                                                |             | Types of measurement                     |                   | Treatment                   |                                                                                    | Outcome               |                            |
|--------|----------------------|--------------|----------------------------|----------|-------------|--------------|----------------------------------------------------------------------------------|----------------------------------|-------------|--------------------------------------------------------------------------------------|-------------|------------------------------------------|-------------------|-----------------------------|------------------------------------------------------------------------------------|-----------------------|----------------------------|
|        | Author               | Country      |                            | Total #  | Age         | Gender (M/F) | Relevant medical background                                                      | Concurrent medications           | Onset       | Types                                                                                | Types       | Volume                                   | Serum Na (mmol/L) | Vitreous humor              | Types                                                                              |                       | Complications/side effects |
| 1      | Kashiura et al. 2017 | Japan        | Retrospective cohort study | 56       | 53          | 26 M, 30 F   | Underlying mental disorder                                                       | Unspecified                      | Unspecified | Convulsions                                                                          | Unspecified | > 6 L/day                                | 111               | -                           | Water restriction                                                                  | Rhabdomyolysis (35)   | Recovery                   |
| 2      | Pal et al. 2017      | India        | Case report                | 1        | 44          | M            | Psychogenic polydipsia, alcohol abuse                                            | -                                | Chronic     | Slurring of speech, drooling, altered sensorium                                      | Water       | 12-15 L/day                              | 94                | -                           | 3% hypertonic saline, levodopa therapy, psychotherapy, water restriction (3 L/day) | Osmotic demyelination | Recovery                   |
| 3      | Suzuki et al. 2016   | Japan        | Case report                | 1        | 52          | M            | Psychogenic polydipsia, schizophrenia                                            | Unspecified                      | Acute       | Vomiting                                                                             | Water       | "Large amounts"                          | 85                | 105 right eye, 107 left eye | -                                                                                  | -                     | Death                      |
| 4      | De Soto et al. 1985  | USA          | Case report                | 1        | 50          | M            | Schizoaffective disorder, psychogenic polydipsia, nephrogenic diabetes insipidus | Mood stabilisers, antipsychotics | Chronic     | Seizure                                                                              | Water       | 20-30 L/day                              | 119               | -                           | Water restriction                                                                  | -                     | Recovery                   |
| 5      | Narci 2013           | Turkey       | Letter/case report         | 1        | 50          | F            | Schizophrenia                                                                    | Unspecified                      | Acute       | Respiratory distress, confusion, pulmonary oedema                                    | Water       | > 10 L/several hrs                       | 129               | -                           | Furosemide, fluid restriction                                                      | -                     | Recovery                   |
| 6      | Shutty et al. 1993   | USA          | Case report                | 1        | 39          | M            | Schizophrenia, psychogenic polydipsia                                            | -                                | Acute       | Auditory hallucination, grandiose delusions, irritability                            | Water       | 2.6 L/hr                                 | 118               | -                           | Thiothixene, lithium, behavioural therapy                                          | -                     | Ongoing                    |
| 7      | Porter et al. 2007   | UK           | Case report                | 1        | 25          | F            | Acute irreversible pulpitis, psychogenic polydipsia                              | -                                | Unspecified | Seizure, encephalopathy, agitation, aggression                                       | Water       | 10 L/day                                 | 123               | -                           | Phenytoin                                                                          | -                     | Recovery                   |
| 8      | O'Brien et al. 2001  | USA          | Case report 1              | 1        | Unspecified | M            | Healthy                                                                          | Unspecified                      | Acute       | Vomiting, weakness, unresponsiveness, respiratory distress, diffuse pulmonary oedema | Water       | ~10 L/2 hrs                              | 121               | -                           | Normal saline                                                                      | -                     | Death                      |
| 9      | O'Brien et al. 2001  | USA          | Case report 2              | 1        | Unspecified | M            | Healthy                                                                          | Unspecified                      | Acute       | Seizures, nausea, vomiting                                                           | Water       | ~2 L/hr during the morning + ~7 L        | 124               | -                           | Unspecified                                                                        | -                     | Recovery                   |
| 10     | O'Brien et al. 2001  | USA          | Case report 3              | 1        | Unspecified | M            | Healthy                                                                          | Unspecified                      | Acute       | Seizure, light-headedness, weakness, metabolic encephalopathy                        | Water       | "Large amounts"                          | 127               | -                           | Unspecified                                                                        | -                     | Recovery                   |
| 11     | O'Brien et al. 2001  | USA          | Case report 4              | 1        | Unspecified | F            | Healthy                                                                          | Unspecified                      | Acute       | Headache, nausea, vomiting, fatigue                                                  | Water       | ~18-20 L/8 hrs                           | 121               | -                           | Unspecified                                                                        | -                     | Recovery                   |
| 12     | O'Brien et al. 2001  | USA          | Case report 5              | 1        | Unspecified | M            | Healthy                                                                          | Unspecified                      | Acute       | Nausea, dizziness, seizures, tiredness, disorientation                               | Water       | ~10 L/4hrs                               | 123               | -                           | Unspecified                                                                        | -                     | Recovery                   |
| 13     | O'Brien et al. 2001  | USA          | Case report 6              | 1        | Unspecified | M            | Healthy                                                                          | Unspecified                      | Acute       | Weakness, blurred vision, bloated feeling                                            | Water       | ~1 L/hr during march + ~3.7 L/30 minutes | 128               | -                           | Unspecified                                                                        | -                     | Unspecified                |
| 14     | Sato et al. 2018     | Japan        | Letter/case report         | 1        | 85          | F            | -                                                                                | -                                | Acute       | Incoherent speech, tremors                                                           | Water       | 1 L/6 hrs                                | 120               | -                           | Na supplementation                                                                 | -                     | Recovery                   |
| 15     | Noakes et al. 1985   | South Africa | Case report 1              | 1        | 46          | F            | Healthy                                                                          | Unspecified                      | Acute       | Watery diarrhoea, confusion, seizure, coma                                           | Total fluid | ~6 L/7 hrs                               | 115               | -                           | 0.9% saline                                                                        | -                     | Recovery                   |
| 16     | Noakes et al. 1985   | South Africa | Case report 2              | 1        | 37          | M            | Healthy                                                                          | Unspecified                      | Acute       | Muscle cramps, twitching, lapsing consciousness                                      | Total fluid | ~12.5 L/10 hrs                           | 118               | -                           | 0.9% saline, 5% dextrose                                                           | -                     | Recovery                   |
| 17     | Noakes et al. 1985   | South Africa | Case report 3              | 1        | 20          | M            | -                                                                                | Unspecified                      | Acute       | Seizure, lapsing consciousness, aggression, sweating                                 | Total fluid | ~10 L/9 hrs                              | 124               | -                           | ~4 L of 0.9% isotonic saline over 12 hrs                                           | -                     | Recovery                   |
| 18     | Noakes et al. 1985   | South Africa | Case report 4              | 1        | 29          | F            | Healthy                                                                          | Unspecified                      | Chronic     | Bloating, short of breath                                                            | Water       | ~8 L/10 hrs                              | 125               | -                           | Diuretic and slow infusion of 0.9% saline                                          | -                     | Recovery                   |
| 19     | Rae 1976             | Canada       | Case report                | 1        | 53          | F            | Diabetes, paranoid schizophrenia                                                 | Antipsychotics                   | Chronic     | Dazed, mute, restless, vomited, loss of                                              | Water       | 6.2 L/day                                | 111               | -                           | 5% glucose and saline, then 3% sodium                                              | -                     | Recovery                   |

|    |                           |           |                            |    |    |           |                                                    |                                                   |             | consciousness, convulsions, coma                                                                      |             |                                  |     |   | chloride (750 mL over 7 hrs), Ringer's lactate, potassium chloride            |                                                                                   |          |
|----|---------------------------|-----------|----------------------------|----|----|-----------|----------------------------------------------------|---------------------------------------------------|-------------|-------------------------------------------------------------------------------------------------------|-------------|----------------------------------|-----|---|-------------------------------------------------------------------------------|-----------------------------------------------------------------------------------|----------|
| 20 | Chapman et al. 2008       | UK        | Case report                | 1  | 37 | F         | Healthy                                            | Unspecified                                       | Acute       | Confusion, seizure                                                                                    | Water       | > 4 L/day                        | 111 | - | Hypertonic saline                                                             | -                                                                                 | Recovery |
| 21 | Davis et al. 2001         | USA       | Cross-sectional study      | 26 | 40 | 3 M, 23 F | Healthy                                            | Unspecified                                       | Acute       | Nausea, vomiting, weakness, confusion, dizziness, seizures, altered mental status                     | Total fluid | "As much as possible"            | 125 | - | Normal saline, 3% hypertonic saline for severe cases                          | Seizures and altered mental status requiring intubation for airway protection (3) | Recovery |
| 22 | Goldman 1994              | USA       | Case report                | 1  | 38 | F         | Schizoaffective disorder, psychogenic polydipsia   | Mood stabilisers, antipsychotics, benzodiazepines | Chronic     | Lightheadedness, seizures, oedema                                                                     | Unspecified | Unspecified                      | 119 | - | Fluid restriction, isotonic saline and inotropic agents                       | -                                                                                 | Death    |
| 23 | Budisavljević et al. 2003 | USA       | Case report                | 1  | 18 | F         | Healthy                                            | Unspecified                                       | Acute       | Anxiety, agitation, visual hallucinations, vomiting, lethargy, loss of responsiveness                 | Water       | "A lot"                          | 124 | - | Normal saline (1 L/8 hrs), 5% saline (480 mL)                                 | -                                                                                 | Recovery |
| 24 | Parkinson et al. 2013     | UK        | Case report                | 1  | 62 | M         | -                                                  | -                                                 | Acute       | Headache, nausea, confusion, seizure, cardiac arrest                                                  | Water       | 5-7 L/day                        | 127 | - | Urinary catheter, fluid restriction                                           | -                                                                                 | Recovery |
| 25 | Adetoki et al. 2013       | UK        | Case report                | 1  | 49 | M         | Paranoid schizophrenia                             | Antipsychotics, benzodiazepines                   | Acute       | Anxiety, agitation, visual and auditory hallucinations, vomiting, confusion, seizure, cerebral oedema | Water       | "Copious quantities"             | 109 | - | Electrolyte corrections                                                       | -                                                                                 | Recovery |
| 26 | Hsu et al. 2005           | Taiwan    | Retrospective cohort study | 11 | 49 | 2 M, 9 F  | Drug abuse (MDMA), psychogenic polydipsia          | Stimulants, antipsychotics, antihypertensives     | Acute       | Bizarre behaviour, delirium, seizures                                                                 | Total fluid | 2.5-10 L/day                     | 115 | - | Hypertonic saline (4 patients also had combination treatment with furosemide) | -                                                                                 | Recovery |
| 27 | Akasaki et al. 1993       | Japan     | Case report                | 1  | 54 | F         | Schizophrenia                                      | Antipsychotics                                    | Chronic     | Auditory hallucination, delusion of persecution, convulsions, coma                                    | Water       | "Large amounts"                  | 116 | - | Methylprednisolone sodium succinate, sodium chloride                          | -                                                                                 | Recovery |
| 28 | Vieweg et al. 1985        | USA       | Case report 2              | 1  | 52 | F         | Schizophrenia                                      | Antipsychotics                                    | Unspecified | Unspecified                                                                                           | Unspecified | Unspecified                      | 110 | - | Unspecified                                                                   | -                                                                                 | Death    |
| 29 | Vieweg et al. 1985        | USA       | Case report 4              | 1  | 45 | F         | Schizophrenia                                      | Antipsychotics                                    | Unspecified | Distended abdomen, unresponsive                                                                       | Water       | "Excessive water intake"         | 115 | - | Unspecified                                                                   | -                                                                                 | Death    |
| 30 | Vieweg et al. 1985        | USA       | Case report 5              | 1  | 24 | M         | Schizophrenia, psychogenic polydipsia              | Antipsychotics                                    | Chronic     | Agitation, nausea, vomiting, seizures, loss of consciousness                                          | Unspecified | Unspecified                      | 110 | - | Unspecified                                                                   | -                                                                                 | Death    |
| 31 | Algahtani et al. 2008     | Canada    | Case report                | 1  | 25 | F         | -                                                  | Unspecified                                       | Unspecified | Lethargy, tremors                                                                                     | Water       | "Restricted diet to water alone" | 109 | - | Saline infusion                                                               | Rapid correction of hyponatraemia caused CPM                                      | Death    |
| 32 | Hiramatsu et al. 2007     | Japan     | Case report                | 1  | 50 | F         | Lower urinary tract infection (UTI)                | -                                                 | Acute       | Severe fatigue, nausea                                                                                | Water       | 4 L/3 hrs                        | 124 | - | Saline infusion with KCl                                                      | -                                                                                 | Recovery |
| 33 | Pavalonis et al. 1992     | USA       | Case report                | 1  | 52 | M         | Schizophrenia, psychogenic polydipsia and polyuria | Mood stabilisers, anticonvulsants                 | Chronic     | Confusion, auditory hallucinations, delusions                                                         | Total fluid | ~10 L/day                        | 130 | - | Behavioural therapy using positive reinforcement                              | -                                                                                 | Ongoing  |
| 34 | Tallis 1989               | Australia | Case report 1              | 1  | 56 | F         | Schizophrenia                                      | Antipsychotics                                    | Unspecified | Confusion, agitation, convulsion, encephalopathy                                                      | Total fluid | "Compulsive intake"              | 109 | - | 1.8% hypertonic saline, water restriction supervised by patient's husband     | -                                                                                 | Recovery |
| 35 | Tallis 1989               | Australia | Case report 2              | 1  | 52 | M         | Schizophrenia                                      | Antipsychotics                                    | Chronic     | Semi-consciousness, seizure                                                                           | Water       | "Compulsive intake"              | 108 | - | 1.8% hypertonic saline                                                        | -                                                                                 | Recovery |
| 36 | Tallis 1989               | Australia | Case report 3              | 1  | 73 | F         | Korsakoff's psychosis                              | Antipsychotics, antidepressants                   | Chronic     | Confusion, agitation                                                                                  | Water       | "Compulsive intake"              | 121 | - | 1.8% hypertonic saline, fluid restriction with supervision                    | -                                                                                 | Recovery |
| 37 | Tallis 1989               | Australia | Case report 4              | 1  | 67 | F         | Dementia                                           | Antipsychotics                                    | Unspecified | Loss of consciousness, generalised convulsion                                                         | Water       | "Large amounts"                  | 115 | - | 1.8% hypertonic saline, fluid restriction                                     | -                                                                                 | Recovery |
| 38 | Chondrogianis et al. 2009 | Greece    | Letter/case report         | 1  | 48 | M         | Healthy                                            | -                                                 | Unspecified | Unspecified                                                                                           | Water       | 8-10 L/day                       | 126 | - | Water restriction (2 L/day)                                                   | -                                                                                 | Recovery |
| 39 | Phull et al. 2011         | UK        | Case report                | 1  | 50 | M         | Paranoid schizophrenia                             | Antipsychotics, antidepressants                   | Unspecified | Depression, loss of consciousness                                                                     | Water       | Unspecified                      | 90  | - | Olanzapine velotabs, olanzapine injections                                    | Post injection hypotension                                                        | Ongoing  |
| 40 | Chamberlain 2012          | USA       | Case report                | 1  | 40 | M         | Paranoid schizophrenia                             | -                                                 | Unspecified | Bloated, oedema in hands and ankles,                                                                  | Water       | "Large amounts"                  | 115 | - | Ziprasidone hydrochloride, lorazepam, 3%                                      | -                                                                                 | Recovery |



|    |                         |              |                            |    |    |             |                                                                                                    |                                                                      | paranoid, delusional, seizure |                                                                                     |             |                                                                                         |     |                             | hypertonic saline (30 mL/h), normal saline (150 mL/hr), lorazepam, haloperidol                            |                                                                                     |          |
|----|-------------------------|--------------|----------------------------|----|----|-------------|----------------------------------------------------------------------------------------------------|----------------------------------------------------------------------|-------------------------------|-------------------------------------------------------------------------------------|-------------|-----------------------------------------------------------------------------------------|-----|-----------------------------|-----------------------------------------------------------------------------------------------------------|-------------------------------------------------------------------------------------|----------|
| 41 | de Leon et al. 1995     | USA          | Case report 2              | 1  | 39 | F           | Schizophrenia, psychogenic polydipsia                                                              | Antipsychotics, antihypertensives, anticonvulsants, mood stabilisers | Chronic                       | Vomiting, seizures                                                                  | Total fluid | ~15 L/day                                                                               | 122 | -                           | Clozapine                                                                                                 | -                                                                                   | Recovery |
| 42 | de Leon et al. 1995     | USA          | Case report 4              | 1  | 33 | M           | Paranoid schizophrenia                                                                             | Antipsychotics                                                       | Chronic                       | Hostile, delusional behaviour, seizure                                              | Water       | "Excessive water intake"                                                                | 110 | -                           | Clozapine                                                                                                 | -                                                                                   | Recovery |
| 43 | Young et al. 1987       | USA          | Case report                | 1  | 21 | M           | Healthy                                                                                            | -                                                                    | Acute                         | Agitated, delirious, pink frothy sputum, pulmonary oedema, metabolic encephalopathy | Water       | 2 L post-race + variable amounts at every water station (16)                            | 123 | -                           | Ringer's lactate, 5% dextrose in normal saline (1.5 L for 1 hr), furosemide                               | Pulmonary oedema                                                                    | Recovery |
| 44 | el-Mallakh et al. 1990  | USA          | Letter/case report         | 1  | 46 | M           | Paranoid schizophrenia                                                                             | Antipsychotics                                                       | Chronic                       | Seizures, anxiety, personality changes                                              | Water       | "Binge drinking of water"                                                               | 127 | -                           | Lithium, neuroleptic                                                                                      | -                                                                                   | Recovery |
| 45 | Shah et al. 1992        | USA          | Retrospective cohort study | 31 | 43 | Unspecified | Schizophrenia, schizoaffective disorder, organic personality disorder, mental retardation, smoking | Anticonvulsants, antihypertensives                                   | Unspecified                   | Seizures, delusions, auditory and visual hallucinations                             | Water       | "Excessive water intake"                                                                | 115 | -                           | Water restriction, salt tablets, behavioural therapy                                                      | -                                                                                   | Ongoing  |
| 46 | Nardone et al. 2010     | Austria      | Case report                | 1  | 50 | F           | Schizophrenia                                                                                      | Antipsychotics                                                       | Unspecified                   | Altered levels of consciousness                                                     | Water       | Unspecified                                                                             | 107 | -                           | Water restriction, furosemide, nasal desmopressin                                                         | -                                                                                   | Recovery |
| 47 | Primavera et al. 1995   | Italy        | Case report                | 1  | 53 | F           | Psychiatric symptoms but no official diagnosis, drug abuse                                         | Antihypertensives                                                    | Chronic                       | Seizures, mental confusion, stupor, slurred speech                                  | Water       | Several litres/day                                                                      | 90  | -                           | Anti-epileptic medication with phenobarbital, 5% NaCl in glucose, lorazepam, phenobarbital, amitriptyline | -                                                                                   | Recovery |
| 48 | Shesser et al. 1985     | USA          | Case report                | 1  | 25 | F           | Schizoaffective disorder                                                                           | Antipsychotics, mood stabilisers                                     | Unspecified                   | Seizure, twitching                                                                  | Water       | ~29 L/day                                                                               | 105 | -                           | Naloxone, urinary catheter, 5% saline over 8 hrs                                                          | -                                                                                   | Recovery |
| 49 | Emsley et al. 1984      | South Africa | Letter/case report         | 1  | 48 | F           | Alcohol abuse                                                                                      | Anticonvulsants, antihypertensives                                   | Unspecified                   | Restless, confused, irritable, disoriented, headaches, vomiting, coma, seizure      | Water       | "Large amounts"                                                                         | 119 | -                           | Diazepam, phenytoin, water restriction                                                                    | -                                                                                   | Recovery |
| 50 | Katsarou et al. 2010    | UK           | Case report                | 1  | 39 | M           | Bipolar disorder, early onset dementia, alcohol abuse                                              | Antipsychotics, anticonvulsants                                      | Chronic                       | Seizure, altered levels of consciousness, headaches, confusion, agitation           | Total fluid | 8-10 L of diet coke/day, 15-20 cups of coffee/day and several cups of water/few minutes | 104 | -                           | Phenytoin, saline, fluid restriction                                                                      | Rhabdomyolysis                                                                      | Recovery |
| 51 | Nagasawa et al. 2014    | Japan        | Case report                | 1  | 20 | M           | Schizophrenia                                                                                      | Antipsychotics, benzodiazepines                                      | Chronic                       | Expanded abdomen, vomiting, collapsing                                              | Water       | "Large amounts"                                                                         | 83  | 113 right eye, 111 left eye | -                                                                                                         | -                                                                                   | Death    |
| 52 | Chen et al. 2016        | Taiwan       | Case report                | 1  | 56 | M           | Schizoaffective disorder                                                                           | Antipsychotics, benzodiazepines                                      | Unspecified                   | Convulsions                                                                         | Water       | "Overhydration"                                                                         | 120 | -                           | Carbamazepine, water restriction program, zotepine, valproate, clonazepam                                 | -                                                                                   | Recovery |
| 53 | Lee et al. 2016         | UK           | Case report                | 1  | 59 | F           | Recurrent UTI                                                                                      | Unspecified                                                          | Acute                         | Shaky, muddled, rapid and shallow breathing                                         | Water       | Several litres/day                                                                      | 123 | -                           | Fluid restriction (1 L/day)                                                                               | -                                                                                   | Recovery |
| 54 | Roche et al. 2018       | Ireland      | Case report                | 1  | 65 | F           | -                                                                                                  | -                                                                    | Unspecified                   | Fatigue, low mood                                                                   | Water       | 3 L/day                                                                                 | 119 | -                           | Water restriction                                                                                         | -                                                                                   | Recovery |
| 55 | Snell et al. 2008       | UK           | Case report                | 1  | 25 | M           | -                                                                                                  | Stimulants                                                           | Acute                         | Seizure, agitation                                                                  | Water       | > 6L/day                                                                                | 114 | -                           | Mannitol, 2.7% hypertonic saline, normal saline                                                           | Pseudobulbar palsy, drooling secretions and dysphagia - possible signs of CPM or OD | Recovery |
| 56 | Coler et al. 2012       | USA          | Case report                | 1  | 85 | M           | Mild renal insufficiency                                                                           | Antihypertensives                                                    | Acute                         | Sleepy, confused, incoherent speech, agitated, short of breath                      | Water       | 3 L/9 hrs                                                                               | 120 | -                           | 0.9% saline, furosemide                                                                                   | -                                                                                   | Recovery |
| 57 | Ledochowski et al. 1986 | Austria      | Case report                | 1  | 47 | F           | Schizophrenia                                                                                      | Unspecified                                                          | Acute                         | Confusion, incoherent speech, seizures, coma                                        | Water       | "Large amounts"                                                                         | 101 | -                           | Hypertonic saline, frusemide, potassium replacement, phenytoin                                            | -                                                                                   | Recovery |
| 58 | Itoh et al. 1997        | Japan        | Case report                | 1  | 33 | M           | Schizophrenia                                                                                      | Unspecified                                                          | Chronic                       | Vomiting, abdominal distension, altered                                             | Water       | "Compulsive intake"                                                                     | 130 | -                           | Fluid restriction, urethral catheter                                                                      | -                                                                                   | Ongoing  |

|    |                             |             |                            |    |    |             |                                         |                                   |             | levels of consciousness                                                                                     |       |                                             |     |   |                                                                                                                           |                |             |
|----|-----------------------------|-------------|----------------------------|----|----|-------------|-----------------------------------------|-----------------------------------|-------------|-------------------------------------------------------------------------------------------------------------|-------|---------------------------------------------|-----|---|---------------------------------------------------------------------------------------------------------------------------|----------------|-------------|
| 59 | Salathe et al. 2018         | Switzerland | Case report                | 1  | 19 | F           | Healthy                                 | Stimulants                        | Acute       | Vomiting, loss of consciousness                                                                             | Water | "Excessive water intake"                    | 122 | - | 3% hypertonic saline, normal saline                                                                                       | -              | Recovery    |
| 60 | Putterman et al. 1993       | Israel      | Case report                | 1  | 19 | M           | Healthy                                 | Unspecified                       | Acute       | Nausea, convulsion                                                                                          | Water | Several litres during the hike + more after | 115 | - | Isotonic fluids, fluid restriction                                                                                        | Rhabdomyolysis | Recovery    |
| 61 | Christenson et al. 1985     | USA         | Case report                | 1  | 79 | F           | -                                       | Unspecified                       | Acute       | Dizziness, decreasing level of consciousness, disorientated                                                 | Water | 1.5-2 L/morning                             | 122 | - | 3% saline (300 mL), 5% glucose in normal saline                                                                           | -              | Recovery    |
| 62 | Onozaki et al. 2001         | Japan       | Case report                | 1  | 42 | M           | Nephrogenic DI, polydipsia and polyuria | Antihypertensives                 | Chronic     | Fatigue, weight gain                                                                                        | Water | 20-27 L/day                                 | 124 | - | Water restriction (10 L/day) and discontinuation of diuretics                                                             | -              | Recovery    |
| 63 | Mavragani et al. 2005       | Greece      | Case report                | 1  | 28 | F           | Polydipsia                              | Mood stabilisers                  | Chronic     | Partial seizures, loss of consciousness                                                                     | Water | 6 L/day                                     | 124 | - | Overnight fluid restriction, diphenhydantoin                                                                              | -              | Recovery    |
| 64 | Gutmann et al. 2002         | USA         | Case report                | 1  | 20 | F           | -                                       | Unspecified                       | Chronic     | Dizziness, headaches, confusion, pulmonary oedema                                                           | Water | 10-12 L/2-3 hrs                             | 123 | - | Furosemide, normal saline (0.7 L)                                                                                         | -              | Death       |
| 65 | Lai et al. 2016             | China       | Case report                | 1  | 60 | F           | Delusional infestation (DI), depression | -                                 | Acute       | Shortness of breath, irritation, vomiting, seizure, loss of consciousness, mild coma, frothing of the mouth | Water | 12 L/few hrs                                | 120 | - | Diazepam, sodium valproate pumping, potassium and sodium supplement, risperidone, aripiprazole, bromocriptine, citalopram | -              | Recovery    |
| 66 | Santos-Soares et al. 2008   | Brazil      | Case report                | 1  | 34 | M           | Healthy                                 | Unspecified                       | Acute       | Sleepy, seizures                                                                                            | Water | 8 L/few hrs                                 | 123 | - | 3% saline infusion                                                                                                        | -              | Recovery    |
| 67 | Yalcin-Cakmakli et al. 2010 | Turkey      | Case report 1              | 1  | 33 | F           | Depression                              | Antidepressants                   | Acute       | Nausea, vomiting, uncooperative, sleepy, anxious, seizure, agitated, confused                               | Water | 5-6 L                                       | 122 | - | Water restriction, oral salt supplementation                                                                              | -              | Recovery    |
| 68 | Yalcin-Cakmakli et al. 2010 | Turkey      | Case report 2              | 1  | 19 | F           | Healthy                                 | Unspecified                       | Acute       | Headache, nausea, vomiting, confused, lethargic                                                             | Water | 3 L/1.5 hrs                                 | 126 | - | Unspecified                                                                                                               | -              | Recovery    |
| 69 | Kowalski et al. 2014        | USA         | Case report 1              | 1  | 23 | M           | Schizophrenia                           | Unspecified                       | Unspecified | Delusions                                                                                                   | Water | "Overhydration"                             | 117 | - | Behavioural therapy (given sports drinks)                                                                                 | -              | Ongoing     |
| 70 | Kowalski et al. 2014        | USA         | Case report 2              | 1  | 63 | M           | -                                       | Unspecified                       | Unspecified | Disoriented, pulmonary oedema                                                                               | Water | "Excessive water intake"                    | 118 | - | Normal saline                                                                                                             | -              | Recovery    |
| 71 | Vieweg et al. 1985          | USA         | Case report 1              | 1  | 46 | M           | Schizophrenia                           | Antipsychotics                    | Unspecified | Major motor seizure, hyposthenuria, hypotonic bowel and bladder                                             | Water | Unspecified                                 | 115 | - | Unspecified                                                                                                               | -              | Unspecified |
| 72 | Vieweg et al. 1985          | USA         | Case report 2              | 1  | 45 | M           | Schizophrenia                           | Antipsychotics                    | Unspecified | Major motor seizure, hyposthenuria                                                                          | Water | Unspecified                                 | 108 | - | Unspecified                                                                                                               | -              | Unspecified |
| 73 | Yong et al. 2015            | Australia   | Case reports               | 10 | 84 | 3 M, 7 F    | Cognitive impairment, alcohol abuse     | Antipsychotics, antihypertensives | Unspecified | Seizures, vomiting, coma, confusion, pulmonary oedema                                                       | Water | ~6 L/day                                    | 106 | - | Fluid restriction (n=7), hypertonic saline (n=3), normal saline (n=9), salt tablets (n=1)                                 | -              | Unspecified |
| 74 | Gillum et al. 1984          | USA         | Case report                | 1  | 37 | F           | Schizophrenia                           | Mood stabilisers                  | Acute       | Semi-comatose                                                                                               | Water | "Copious quantities"                        | 118 | - | Urinary catheter                                                                                                          | -              | Recovery    |
| 75 | Cheng et al. 1990           | USA         | Retrospective cohort study | 13 | 49 | Unspecified | Schizophrenia, alcohol dementia         | Antipsychotics, antihypertensives | Unspecified | Seizures, coma, confusion, vomiting, lethargy, weakness, agitation                                          | Water | > 400 mL/hr                                 | 110 | - | Hypertonic saline, fluid restriction                                                                                      | -              | Recovery    |
| 76 | Issa et al. 1997            | USA         | Case report                | 1  | 72 | M           | -                                       | Unspecified                       | Acute       | Anxiety, weakness, confusion, seizure                                                                       | Water | > 6 L/3 hrs                                 | 118 | - | Fluid restriction, diuretics, 3% hypertonic saline                                                                        | -              | Recovery    |
| 77 | Mirvis et al. 2015          | UK          | Case report 1              | 1  | 87 | F           | Multiple myeloma                        | Antineoplastics                   | Chronic     | Confused, disorientated                                                                                     | Water | 3 L/day                                     | 112 | - | Fluid restriction                                                                                                         | -              | Recovery    |
| 78 | Mirvis et al. 2015          | UK          | Case report 2              | 1  | 77 | F           | Multiple myeloma                        | Antineoplastics                   | Chronic     | Unspecified                                                                                                 | Water | 4 L/day                                     | 126 | - | Fluid restriction (1-1.5 L/day)                                                                                           | -              | Recovery    |
| 79 | Strachan et al. 2007        | USA         | Case report                | 1  | 63 | M           | Bipolar disorder                        | Antipsychotics, mood stabilisers  | Unspecified | Shortness of breath, lethargic, pulmonary oedema                                                            | Water | 10-12 L/day                                 | 110 | - | 3% saline, bicarbonate infusion                                                                                           | Rhabdomyolysis | Recovery    |
| 80 | Noonan et al. 1977          | Canada      | Case report                | 1  | 32 | F           | Mental retardation                      | Unspecified                       | Unspecified | Nausea, vomiting, agitation, auditory and visual hallucinations, altered levels of consciousness            | Water | "Excessive water intake"                    | 127 | - | Phenothiazines, butyrophenones, thioxanthenes, behavioural therapy                                                        | -              | Ongoing     |

|     |                        |           |                            |    |    |            |                                                                          |                                                   |              |                                                                                                                         |             |                                             |     |     |                                                                                                                |                                             |             |
|-----|------------------------|-----------|----------------------------|----|----|------------|--------------------------------------------------------------------------|---------------------------------------------------|--------------|-------------------------------------------------------------------------------------------------------------------------|-------------|---------------------------------------------|-----|-----|----------------------------------------------------------------------------------------------------------------|---------------------------------------------|-------------|
| 81  | Hayashi et al. 2005    | Japan     | Case report                | 1  | 69 | M          | Schizophrenia                                                            | Unspecified                                       | Unspecified  | Unspecified                                                                                                             | Water       | "Excessive water intake"                    | 92  | -   | -                                                                                                              | -                                           | Death       |
| 82  | Vanhaebost et al. 2018 | Belgium   | Case report                | 1  | 54 | M          | Tobacco addiction, diabetes, schizophrenia                               | Antipsychotics, antidepressants                   | Acute        | Vomiting, convulsions                                                                                                   | Water       | 5 L/3 hrs                                   | -   | 117 | -                                                                                                              | -                                           | Death       |
| 83  | Cronin 1987            | USA       | Case report 1              | 1  | 60 | M          | Intractable hiccups, alcohol abuse                                       | Unspecified                                       | Unspecified  | Hiccups, weakness, nausea, vomiting, confusion                                                                          | Water       | 10-12 gallons/day                           | 113 | -   | Saline, water restriction, hypnosis, thorazine, diazepam                                                       | -                                           | Ongoing     |
| 84  | Cronin 1987            | USA       | Case report 2              | 1  | 56 | M          | Intractable hiccups, alcohol abuse                                       | Antipsychotics                                    | Unspecified  | Hiccups, vomiting, seizures, agitation, semi-comatose                                                                   | Total fluid | "Large amounts"                             | 103 | -   | Isotonic saline, water restriction, hypertonic saline, frusemide                                               | -                                           | Recovery    |
| 85  | Brenner et al. 1991    | UK        | Case report 1              | 1  | 58 | F          | Schizophrenia, mental handicap, diabetes                                 | Antipsychotics                                    | Unspecified  | Vomiting, fits, stupor                                                                                                  | Water       | "Excessive water intake"                    | 116 | -   | Phenytoin, increased dose of haloperidol                                                                       | -                                           | Recovery    |
| 86  | Brenner et al. 1991    | UK        | Case report 2              | 1  | 53 | M          | Brain damage                                                             | Antihypertensives                                 | Unspecified  | Confusion                                                                                                               | Total fluid | "Excessive water intake"                    | 125 | -   | Chlormpromazine, haloperidol, demeclocycline                                                                   | -                                           | Recovery    |
| 87  | Brenner et al. 1991    | UK        | Case report 3              | 1  | 51 | F          | Personality disorder                                                     | Antipsychotics, antidepressants                   | Unspecified  | Confusion, vomiting, distended abdomen, rigidity, coma                                                                  | Water       | "Always at the tap"                         | 118 | -   | Fluid restriction, flupenthixol, lithium                                                                       | -                                           | Recovery    |
| 88  | Brenner et al. 1991    | UK        | Case report 4              | 1  | 29 | M          | Disintegrative psychosis, childhood autism, anxiety                      | Antipsychotics, antihypertensives                 | Unspecified  | Abusive, tense, vomiting, diarrhoea, coma, respiratory arrest, cerebral oedema                                          | Water       | "Excessive water intake"                    | 121 | -   | Fluid restriction, sodium bicarbonate, normal saline (2 L)                                                     | Hypertonaemia with flaccid tetraplegia, CPM | Death       |
| 89  | Brenner et al. 1991    | UK        | Case report 5              | 1  | 41 | M          | Epilepsy, smoking, alcohol abuse                                         | Mood stabilisers                                  | Unspecified  | Unsteady gait, slurred speech                                                                                           | Total fluid | Coffee with powdered milk + water/5 minutes | 126 | -   | Discontinuation of carbamazepine, fluid restriction                                                            | -                                           | Unspecified |
| 90  | Grainger et al. 1992   | UK        | Case report                | 1  | 60 | F          | Schizoaffective disorder                                                 | Antipsychotics                                    | Unspecified  | Auditory and visual hallucinations, nausea, vomiting, headache, confusion, semi-consciousness, disorientation, seizures | Water       | 4 L/12 hrs                                  | 109 | -   | Fluid restriction (500 mL), diazepam, hypertonic saline (1 L), electrolytes, urinary catheter, chlormpromazine | -                                           | Recovery    |
| 91  | Peh et al. 1990        | Singapore | Retrospective cohort study | 27 | 35 | 10 M, 17 F | Schizophrenia, mental retardation, alcohol dependence syndrome, epilepsy | Antipsychotics, antidepressants, mood stabilisers | Unspecified  | Nausea, tremors, weight gain, disorientation, coma                                                                      | Water       | ~3 L/day                                    | 120 | -   | Fluid restriction                                                                                              | -                                           | Unspecified |
| 92  | Ismail et al. 2010     | Canada    | Letter/case report         | 1  | 62 | M          | Schizophrenia, smoking                                                   | Antipsychotics                                    | Chronic      | Paranoia, delusions, irritability                                                                                       | Water       | "Increase in water intake"                  | 125 | -   | Fluid restriction, normal saline                                                                               | -                                           | Recovery    |
| 93  | Prim 1988              | USA       | Case report                | 1  | 47 | M          | Schizophrenia                                                            | Antipsychotics                                    | Unspecified  | Seizures, copious projectile emesis and uremia                                                                          | Water       | > 20 cups/day                               | 123 | -   | Structured activities, nursing intervention, reduction in medication                                           | -                                           | Recovery    |
| 94  | Lin et al. 2011        | Taiwan    | Case report                | 1  | 31 | F          | Schizophrenia                                                            | Unspecified                                       | Unspecified  | Seizures, loss of consciousness, vomiting                                                                               | Water       | ~15 L/day                                   | 112 | -   | Lorazepam, phenytoin, 3% saline                                                                                | -                                           | Recovery    |
| 95  | Peh et al. 1990        | Singapore | Case report                | 1  | 40 | F          | Schizophrenia, diabetes mellitus                                         | Antipsychotics                                    | Unspecified  | Confusion, fits, coma, restless, frothing at the mouth, pulmonary oedema                                                | Water       | "Excessive water intake"                    | 109 | -   | Dextrose-saline drip, fluid restriction                                                                        | -                                           | Death       |
| 96  | Finkel 2004            | USA       | Case report                | 1  | 45 | F          | Healthy                                                                  | -                                                 | Asymptomatic | Asymptomatic                                                                                                            | Water       | 6-8 L/day                                   | 124 | -   | Unspecified                                                                                                    | -                                           | Unspecified |
| 97  | Finlayson et al. 1989  | Canada    | Case report                | 1  | 55 | F          | Depression                                                               | Antipsychotics                                    | Acute        | Agitation, vomiting, seizure                                                                                            | Water       | 5-10 L/day                                  | 106 | -   | Saline, fluid restriction, vasopressin, lithium, isocarboxazid, L-tryptophan                                   | -                                           | Recovery    |
| 98  | Howe et al. 1983       | UK        | Case report                | 1  | 25 | M          | Healthy                                                                  | Unspecified                                       | Unspecified  | Poor memory, seizures, hallucinations, disorientated, aggressive                                                        | Water       | "Drank from 2 L jugs + bath water"          | 125 | -   | Phenytoin, haloperidol, hypertonic saline                                                                      | -                                           | Ongoing     |
| 99  | Koczapski et al. 1989  | Canada    | Cohort study               | 8  | 42 | M          | Schizophrenia                                                            | Antipsychotics                                    | Unspecified  | Stupor, seizures, drooling                                                                                              | Total fluid | ~11 L/day                                   | 127 | -   | Fluid restriction                                                                                              | -                                           | Unspecified |
| 100 | Kato et al. 2008       | Japan     | Case report                | 1  | 70 | F          | Glomerulonephritis, moderate renal failure                               | Antineoplastics                                   | Unspecified  | Nausea, cerebral oedema                                                                                                 | Total fluid | > 2 L/12 hrs                                | 108 | -   | Fluid restriction (1 L/day)                                                                                    | -                                           | Recovery    |
| 101 | Windpessl et al. 2017  | Austria   | Case report                | 1  | 61 | F          | Healthy                                                                  | NSAIDs                                            | Acute        | Nausea, dizziness, vomiting, confusion, unintelligible speech, unsteady gait, tremor                                    | Total fluid | 4 L                                         | 122 | -   | 3% hypertonic saline                                                                                           | -                                           | Recovery    |
| 102 | Kushnir et al. 1990    | Israel    | Case report                | 1  | 31 | F          | Schizophrenia, depression                                                | Antipsychotics, antispasmodics                    | Acute        | Irritability, vomiting, diarrhoea, coma, shallow breathing, cerebral oedema                                             | Water       | "Drinking frequently"                       | 120 | -   | -                                                                                                              | -                                           | Death       |
| 103 | Korzets et al. 1996    | Israel    | Case report                | 1  | 28 | F          | Paranoid schizophrenia                                                   | Antipsychotics                                    | Chronic      | Confused, dysphasic, coma                                                                                               | Water       | "Excessive water intake"                    | 109 | -   | Urethral catheter, hypertonic saline,                                                                          | Fever (39.3 C), rhabdomyolysis              | Recovery    |

|     |                          |                      |                                  |   |    |          |                                                                          |                                                                     |             |                                                                                 |       |                          |     |     |                                                                                                                                                                                      |              |             |
|-----|--------------------------|----------------------|----------------------------------|---|----|----------|--------------------------------------------------------------------------|---------------------------------------------------------------------|-------------|---------------------------------------------------------------------------------|-------|--------------------------|-----|-----|--------------------------------------------------------------------------------------------------------------------------------------------------------------------------------------|--------------|-------------|
|     |                          |                      |                                  |   |    |          |                                                                          |                                                                     |             |                                                                                 |       |                          |     |     | furosemide, KCl, magnesium sulfate                                                                                                                                                   |              |             |
| 104 | Caputo et al. 2001       | Italy                | Case report                      | 1 | 57 | M        | Chronic alcoholism, smoking                                              | Antihypertensives, benzodiazepines                                  | Chronic     | Vomiting, diarrhoea, muscle pain, loss of consciousness                         | Water | 4-5 L/day                | 95  | -   | Furosemide, 1.5% saline, water restriction, nifedipine, alprazolam, theophylline, disulfiram                                                                                         | -            | Recovery    |
| 105 | Inoue et al. 1985        | Japan                | Cohort study                     | 6 | 38 | 4 M, 2 F | Schizophrenia, schizoaffective disorder, borderline personality disorder | Antipsychotics                                                      | Acute       | Seizures, coma, nausea, vomiting, sleepiness                                    | Water | "Excessive water intake" | 120 | -   | 2.5% sodium chloride                                                                                                                                                                 | -            | Recovery    |
| 106 | Beresford 1970           | USA                  | Case report 1                    | 1 | 34 | F        | Schizophrenia                                                            | Antipsychotics, antihypertensives                                   | Acute       | Seizure, incoherent, somnolent, nauseous, distended bladder, lethargic          | Water | Gallons/day              | 115 | -   | 5% saline (250 mL), fluid restriction                                                                                                                                                | -            | Recovery    |
| 107 | Beresford 1970           | USA                  | Case report 2                    | 1 | 61 | M        | Depression                                                               | Antihypertensives                                                   | Unspecified | Drowsiness, fatigue, confusion, disorientation                                  | Water | "Copious quantities"     | 115 | -   | Hydrochlorothiazide, potassium chloride supplements, fluid restriction                                                                                                               | -            | Recovery    |
| 108 | Goldman et al. 1988      | USA                  | Case-control study               | 8 | 43 | 7 M, 1 F | Schizophrenia, organic delusional syndrome                               | Antipsychotics                                                      | Acute       | -                                                                               | Water | Unspecified              | 133 | -   | Hypertonic saline                                                                                                                                                                    | -            | Unspecified |
| 109 | Gleadhill et al. 1982    | USA                  | Retrospective case-control study | 8 | 50 | 1 M, 7 F | Schizophrenia, smoking                                                   | Antipsychotics                                                      | Unspecified | Obtunded, seizures, vomiting                                                    | Water | "Excessive water intake" | 115 | -   | Unspecified                                                                                                                                                                          | -            | Recovery    |
| 110 | Shapira et al. 1988      | Israel               | Case report                      | 1 | 80 | F        | Healthy                                                                  | Unspecified                                                         | Acute       | Restless, confused, uncooperative                                               | Water | 4 L/night                | 119 | -   | Hypertonic saline                                                                                                                                                                    | -            | Recovery    |
| 111 | Basnyat et al. 2000      | Nepal                | Case report                      | 1 | 28 | F        | -                                                                        | Mood stabilisers                                                    | Acute       | Headache, fatigue, blurred vision, confusion, delirium, seizures, semi-comatose | Water | 10 L/day                 | 122 | -   | Midazolam, phenytoin, Ringer's lactate, normal saline                                                                                                                                | -            | Recovery    |
| 112 | Bhananker et al. 2004    | USA                  | Case report                      | 1 | 40 | F        | Anxiety                                                                  | Benzodiazepines                                                     | Acute       | Anxiety, nausea, confusion, tremors                                             | Water | 10 L/few hrs             | 120 | -   | Fluid restriction, 0.9% saline, Foley catheter                                                                                                                                       | -            | Recovery    |
| 113 | Vieweg et al. 1984       | USA                  | Case report 1                    | 1 | 35 | M        | Paranoid schizophrenia, psychogenic polydipsia                           | Antipsychotics                                                      | Chronic     | Auditory hallucinations, delusions, seizures                                    | Water | 25 L/day                 | 115 | -   | Haloperidol, supplemental sodium chloride, fluid restriction                                                                                                                         | -            | Ongoing     |
| 114 | Vieweg et al. 1984       | USA                  | Case report 2                    | 1 | 42 | F        | Catatonic schizophrenia, psychogenic polydipsia                          | Antipsychotics                                                      | Chronic     | Agitation, hallucinations, delusions                                            | Water | 13 L/day                 | 124 | -   | Haloperidol, fluid restriction, supplemental sodium chloride                                                                                                                         | -            | Ongoing     |
| 115 | Vieweg et al. 1984       | USA                  | Case report 3                    | 1 | 46 | M        | Schizophrenia, psychogenic polydipsia                                    | Antipsychotics                                                      | Chronic     | Hallucinations, delusions                                                       | Water | 35 L/day                 | 115 | -   | Fluid restriction, fluphenazine, chlorpromazine, supplemental sodium chloride                                                                                                        | -            | Ongoing     |
| 116 | Vieweg et al. 1984       | USA                  | Case report 4                    | 1 | 45 | M        | Schizophrenia, psychogenic polydipsia                                    | Antipsychotics                                                      | Chronic     | Withdrawal, inattention, hallucinations, delusions                              | Water | 28 L/day                 | 108 | -   | Haloperidol, fluid restriction, supplemental sodium chloride                                                                                                                         | -            | Ongoing     |
| 117 | DiMaio et al. 1980       | USA                  | Case report                      | 1 | 54 | F        | Psychosis                                                                | Antipsychotics, anticholinergics                                    | Acute       | Passing out, possibly seizing, nervous, agitated, confused                      | Water | "Large amounts"          | 110 | 115 | Hypertonic saline, water restriction                                                                                                                                                 | -            | Death       |
| 118 | Lydakiis et al. 2005     | Greece               | Case report                      | 1 | 59 | M        | Psychotic disorder                                                       | NSAIDs                                                              | Chronic     | Epilepsy, delusions                                                             | Water | 9-12 L/day               | 110 | -   | Hypertonic saline, fluid restriction (1.5 L/day) risperidone, benzodiazepines                                                                                                        | -            | Death       |
| 119 | Pupic-Bakrac et al. 2017 | Bosnia & Herzegovina | Case report                      | 1 | 43 | M        | Psychosis, moderate mental retardation                                   | Mood stabilisers, antipsychotics, anticholinergics, benzodiazepines | Chronic     | Convulsions, vomiting, disorientated                                            | Water | "Large amounts"          | 98  | -   | 0.9% NaCl (500 mL), water restriction (2 L/day), 7.5% hypertonic solution, urinary catheter, amlodipine, sodium valproate, haloperidol, promazine, diazepam, biperiden hydrochloride | -            | Recovery    |
| 120 | Mukherjee et al. 2005    | UK                   | Case report                      | 1 | 52 | F        | Healthy                                                                  | -                                                                   | Acute       | Aphasic, loss of consciousness, slurred speech, disorientated                   | Water | "Large amounts"          | 108 | -   | Potassium replacement, hypertonic saline, normal saline (1 L), venlafaxine, quetiapine                                                                                               | Brain damage | Recovery    |
| 121 | Solomon et al. 2019      | Israel               | Case report 1                    | 1 | 30 | F        | Healthy                                                                  | Unspecified                                                         | Acute       | Disoriented, confused                                                           | Water | "Large amounts"          | 118 | -   | Fluid restriction, 0.9% normal saline                                                                                                                                                | -            | Recovery    |
| 122 | Solomon et al. 2019      | Israel               | Case report 2                    | 1 | 30 | F        | Healthy                                                                  | -                                                                   | Acute       | Unspecified                                                                     | Water | "Excessive water intake" | 120 | -   | Fluid restriction                                                                                                                                                                    | -            | Recovery    |
| 123 | Vishwajeet et al. 2005   | India                | Case report                      | 1 | 77 | M        | Healthy                                                                  | Unspecified                                                         | Acute       | Altered sensorium, weakness, seizure                                            | Water | 6 L/4 hrs                | 119 | -   | Fluid restriction, diuretics, hypertonic saline                                                                                                                                      | -            | Recovery    |

|     |                          |              |                                |    |    |             |                                                                         |                                                   |              |                                                                                                        |             |                                     |     |    |                                                                 |                               |             |       |
|-----|--------------------------|--------------|--------------------------------|----|----|-------------|-------------------------------------------------------------------------|---------------------------------------------------|--------------|--------------------------------------------------------------------------------------------------------|-------------|-------------------------------------|-----|----|-----------------------------------------------------------------|-------------------------------|-------------|-------|
| 124 | Goldman et al. 1985      | USA          | Retrospective cohort study     | 8  | 46 | 7 M, 1 F    | Schizophrenia                                                           | Antipsychotics, anticholinergics                  | Unspecified  | Seizures                                                                                               | Water       | "Compulsive intake"                 | 127 | -  | Salt tablets, fluid restriction, demeclocycline                 | -                             | Ongoing     |       |
| 125 | Chen et al. 2014         | Taiwan       | Case report                    | 1  | 80 | F           | Xerostomia, polydipsia, type II diabetes                                | -                                                 | Acute        | Vertigo, nausea, vomiting                                                                              | Water       | 4 L/several hrs                     | 120 | -  | Water diary, oral salt supplementation, 3% saline               | -                             | Death       |       |
| 126 | Yonemura et al. 1987     | Japan        | Case report                    | 1  | 26 | M           | Mental retardation                                                      | -                                                 | Acute        | Headache, vomiting, seizure                                                                            | Water       | 10-15 L/day                         | 117 | -  | Water restriction                                               | -                             | Ongoing     |       |
| 127 | Nolte et al. 2019        | South Africa | Case report                    | 1  | 26 | M           | Healthy                                                                 | Unspecified                                       | Asymptomatic | Asymptomatic                                                                                           | Water       | 800 mL/hr                           | 134 | -  | Unspecified                                                     | -                             | Unspecified |       |
| 128 | Farrell et al. 2003      | UK           | Case report                    | 1  | 64 | F           | -                                                                       | Unspecified                                       | Acute        | Vomiting, hysteria, distress                                                                           | Water       | 30-40 glasses                       | -   | 92 | -                                                               | -                             | -           | Death |
| 129 | Losonczy et al. 2016     | USA          | Case report                    | 1  | 41 | F           | Recurrent UTIs                                                          | Unspecified                                       | Acute        | Nausea, dizziness, anxiety, seizure, combative, cerebral oedema                                        | Water       | 4-5 L/several hrs                   | 114 | -  | 3% hypertonic saline (100 mL), furosemide                       | Neurogenic stunned myocardium | Recovery    |       |
| 130 | Sarvesvaran 1984         | UK           | Case report                    | 1  | 40 | F           | Healthy                                                                 | Unspecified                                       | Acute        | Vomiting, confusion, talking gibberish, seizure, semi-consciousness, pulmonary and cerebral oedema     | Water       | "Plenty of water"                   | 111 | -  | Unspecified                                                     | -                             | Death       |       |
| 131 | Cicognani et al. 2013    | Italy        | Case report                    | 1  | 51 | F           | Type I diabetes, psychogenic polydipsia                                 | Antidepressants                                   | Unspecified  | Coma, seizures                                                                                         | Water       | "Compulsive intake"                 | 112 | -  | Water restriction (< 1.5 L/day)                                 | -                             | Recovery    |       |
| 132 | Hanihara et al. 1997     | Japan        | Case report 1                  | 1  | 58 | M           | Schizophrenia, psychogenic polydipsia                                   | Antipsychotics                                    | Chronic      | Seizure, loss of consciousness, lethargy                                                               | Water       | "Excessive water intake"            | 114 | -  | Fluid restriction (1.8 L/day), demeclocycline                   | -                             | Ongoing     |       |
| 133 | Hanihara et al. 1997     | Japan        | Case report 2                  | 1  | 52 | M           | Schizophrenia, polydipsia, cognitive impairment                         | Unspecified                                       | Chronic      | Agitated, ataxic gait, cognitive impairment                                                            | Water       | "Compulsive intake"                 | 131 | -  | Water restriction                                               | -                             | Recovery    |       |
| 134 | Hanihara et al. 1997     | Japan        | Case report 3                  | 1  | 52 | M           | Disorganised schizophrenia, psychogenic polydipsia                      | Unspecified                                       | Chronic      | Agitated                                                                                               | Water       | "Compulsive intake"                 | 118 | -  | Water restriction                                               | -                             | Ongoing     |       |
| 135 | Santonastaso et al. 1998 | Italy        | Case report                    | 1  | 26 | F           | Anorexia nervosa                                                        | Antipsychotics                                    | Chronic      | Headache, vomiting, seizures                                                                           | Water       | 6 L/day                             | 113 | -  | Hyperosmolar infusions and forced hyperdiuresis                 | -                             | Ongoing     |       |
| 136 | Ramirez et al. 1993      | USA          | Letter/case report             | 1  | 58 | M           | Intractable hiccups                                                     | Unspecified                                       | Unspecified  | Unspecified                                                                                            | Water       | 2-3 gallons/day                     | 111 | -  | Gamma-aminobutyric acid analog baclofen therapy                 | -                             | Recovery    |       |
| 137 | Kott et al. 1985         | Israel       | Case report                    | 1  | 21 | F           | Healthy                                                                 | Unspecified                                       | Acute        | Confused, agitated, non-communicative, headache, nausea, vomiting, restlessness, loss of consciousness | Water       | 30 glasses                          | 127 | -  | Urinary catheter, 5% NaCl (300 mL), 20% mannitol, dexamethasone | -                             | Recovery    |       |
| 138 | Zilles et al. 2010       | Germany      | Case report                    | 1  | 26 | F           | Schizophrenia                                                           | Antipsychotics, benzodiazepines                   | Acute        | Agitation, vomiting                                                                                    | Water       | 3 L/30 minutes                      | 112 | -  | Quetiapine, olanzapine                                          | -                             | Recovery    |       |
| 139 | Tenyi et al. 2006        | Hungary      | Case report                    | 1  | 46 | M           | Paranoid schizophrenia                                                  | Antipsychotics                                    | Chronic      | Seizure, vomiting, mild muscle pain                                                                    | Water       | "Compulsive intake"                 | 113 | -  | Hyperosmolar sodium solution, olanzapine                        | Rhabdomyolysis                | Recovery    |       |
| 140 | Mor et al. 1987          | Israel       | Case report                    | 1  | 64 | F           | Depression                                                              | Antipsychotics, benzodiazepines                   | Acute        | Stupor                                                                                                 | Water       | "Excessive water intake"            | 119 | -  | Urinary catheter                                                | -                             | Recovery    |       |
| 141 | Johansson et al. 2002    | Sweden       | Case report 1                  | 1  | 33 | F           | Healthy                                                                 | Unspecified                                       | Acute        | Vomiting, seizures                                                                                     | Total fluid | Several litres/9 hrs                | 115 | -  | Unspecified                                                     | -                             | Unspecified |       |
| 142 | Johansson et al. 2002    | Sweden       | Case report 2                  | 1  | 30 | F           | Healthy                                                                 | -                                                 | Asymptomatic | Asymptomatic                                                                                           | Water       | > 8 L/23 hrs                        | 129 | -  | Unspecified                                                     | -                             | Unspecified |       |
| 143 | Goldman et al. 1994      | USA          | Cohort study                   | 4  | 34 | M           | Schizophrenia                                                           | Antipsychotics, benzodiazepines, mood stabilisers | Asymptomatic | Asymptomatic                                                                                           | Total fluid | ~4.9 L/day                          | 132 | -  | Electrolyte-containing beverages                                | -                             | Ongoing     |       |
| 144 | Raskind 1974             | USA          | Case report                    | 1  | 56 | F           | Psychotic depression, schizophrenia                                     | Antipsychotics, antihypertensives                 | Acute        | Agitated, irrational, difficulty sleeping, paranoid, nauseous, confused, incoherent                    | Water       | "Copious quantities"                | 111 | -  | -                                                               | -                             | Death       |       |
| 145 | Musch et al. 2003        | Belgium      | Prospective uncontrolled study | 10 | 55 | Unspecified | Schizophrenia, psychotic disease, alcohol abuse, psychogenic polydipsia | Unspecified                                       | Unspecified  | Drowsiness, weakness, confusion                                                                        | Total fluid | > 4 L/day                           | 126 | -  | Isotonic saline (2 L/24 hrs)                                    | -                             | Recovery    |       |
| 146 | Mercier-Guidez 1998      | France       | Letter/case report             | 1  | 43 | M           | Disorganised schizophrenia, smoking, psychogenic polydipsia             | Antipsychotics                                    | Chronic      | Coma, vomiting, tremors, confusion, agitation, seizures, drowsiness, delirium                          | Total fluid | 13 L/day                            | 110 | -  | Behavioural therapy, fluid restriction                          | -                             | Recovery    |       |
| 147 | Gopal et al. 2000        | USA          | Case report                    | 1  | 58 | F           | Smoking                                                                 | -                                                 | Acute        | Drowsy, disoriented, nausea, vomiting, seizures                                                        | Water       | Several litres + 3 more litres/1 hr | 118 | -  | Promethazine, 0.9% saline, diazepam, water restriction          | -                             | Recovery    |       |
| 148 | Moshihi et al. 2014      | USA          | Case report                    | 1  | 81 | F           | Anxiety disorder, anorexia                                              | Antipsychotics, antihypertensives                 | Unspecified  | Unspecified                                                                                            | Water       | "Excessive water intake"            | 122 | -  | Fluid restriction, discontinuation of hydrochlorothiazide       | -                             | Recovery    |       |

|     |                         |              |                                  |    |    |            |                                                                                   | benzodiazepines   |              |                                                                                                                          |             |                                                                  |     |   |                                                                                        |                                                |                       |  |
|-----|-------------------------|--------------|----------------------------------|----|----|------------|-----------------------------------------------------------------------------------|-------------------|--------------|--------------------------------------------------------------------------------------------------------------------------|-------------|------------------------------------------------------------------|-----|---|----------------------------------------------------------------------------------------|------------------------------------------------|-----------------------|--|
| 149 | Lightenberg et al. 1998 | Netherlands  | Letter/case report               | 1  | 34 | F          | Healthy                                                                           | -                 | Acute        | Anxiety, hallucinations, loss of consciousness, lung oedema, cerebellar herniation                                       | Water       | > 6 L/several hrs                                                | 114 | - | Mannitol                                                                               | -                                              | Death                 |  |
| 150 | Gardner 2002            | USA          | Case report 1                    | 1  | 18 | M          | Healthy                                                                           | -                 | Acute        | Vomiting, dizziness, headache, nausea, confusion, lethargy, loss of consciousness, diffuse cerebral and brainstem oedema | Water       | ~20 L/several hrs                                                | 121 | - | Unspecified                                                                            | -                                              | Death                 |  |
| 151 | Gardner 2002            | USA          | Case report 2                    | 1  | 20 | M          | Healthy                                                                           | Unspecified       | Acute        | Cough, seizure                                                                                                           | Water       | 6 canteens/2-3 hrs                                               | 113 | - | Unspecified                                                                            | -                                              | Recovery              |  |
| 152 | Gardner 2002            | USA          | Case report 3                    | 1  | 19 | M          | Healthy                                                                           | Unspecified       | Acute        | Altered mental status, confusion, lethargy, vomiting, fatigue, coma, cerebral oedema                                     | Water       | 1 gallon/evening                                                 | 128 | - | Unspecified                                                                            | Rhabdomyolysis                                 | Death                 |  |
| 153 | Kipps et al. 2011       | UK           | Cross-sectional study            | 11 | 37 | 4 M, 7 F   | Healthy                                                                           | Unspecified       | Asymptomatic | Asymptomatic                                                                                                             | Total fluid | 3.7 L                                                            | 132 | - | Unspecified                                                                            | -                                              | Unspecified           |  |
| 154 | Tilley et al. 2011      | USA          | Case report                      | 1  | 37 | M          | Healthy                                                                           | -                 | Acute        | Abdominal pain, confusion, restless, inarticulate, seizure                                                               | Water       | 14 L/3 hrs                                                       | 122 | - | Normal saline, lorazepam, Foley catheter                                               | -                                              | Recovery              |  |
| 155 | Hariprasad et al. 1980  | USA          | Cohort study                     | 16 | 50 | M          | Schizophrenia, organic brain syndrome                                             | Antipsychotics    | Unspecified  | Headache, lethargy, coma, seizures                                                                                       | Total fluid | 7-43 L/day                                                       | 111 | - | Water restriction, 5% NaCl                                                             | -                                              | Recovery              |  |
| 156 | Noakes et al. 2004      | South Africa | Case report                      | 1  | 34 | M          | Healthy                                                                           | Unspecified       | Acute        | Mildly confused, oedema in hands, difficulty concentrating, sleepy                                                       | Total fluid | 750 mL/hr while cycling + "drink as much as possible" afterwards | 127 | - | Fluid restriction, 16 NaCl tablets, furosemide                                         | -                                              | Recovery              |  |
| 157 | Oh et al. 2018          | USA          | Case report 1                    | 1  | 31 | F          | Healthy                                                                           | Unspecified       | Acute        | Dizzy, collapsed                                                                                                         | Water       | ~4.5 L/2 hrs                                                     | 129 | - | 0.9% normal saline (2.5 L)                                                             | -                                              | Recovery              |  |
| 158 | Oh et al. 2018          | USA          | Case report 2                    | 1  | 27 | F          | Healthy                                                                           | Unspecified       | Acute        | Collapsed                                                                                                                | Water       | ~5 L/2.5 hrs                                                     | 131 | - | 0.9% normal saline                                                                     | -                                              | Recovery              |  |
| 159 | Oh et al. 2018          | USA          | Case report 3                    | 1  | 27 | M          | Healthy                                                                           | Unspecified       | Acute        | Weakness, dizziness, nausea, vomiting                                                                                    | Water       | ~6 L/2 hrs                                                       | 125 | - | 0.9% normal saline, fluid restriction, 3% hypertonic saline (120 mL)                   | -                                              | Recovery              |  |
| 160 | Tanneau et al. 1993     | France       | Retrospective case-control study | 72 | 65 | 31 M, 41 F | Psychogenic polydipsia                                                            | Antihypertensives | Unspecified  | Weakness, nausea, vomiting, confusion, disorientation, drowsiness, agitation, headaches, vertigo, tremor                 | Water       | "Compulsive intake"                                              | 110 | - | Hypertonic saline, isotonic saline, fluid restriction                                  | Brain damage (3)                               | Recovery + death (11) |  |
| 161 | Madero et al. 2015      | Mexico       | Case report                      | 1  | 57 | F          | -                                                                                 | Antihypertensives | Acute        | Headache, nausea, disorientation, seizure, cerebral oedema                                                               | Water       | "Excessive water intake"                                         | 116 | - | Diazepam, vasopressors, 3% hypertonic saline                                           | -                                              | Recovery              |  |
| 162 | Rosenbaum et al. 1979   | USA          | Case report 1                    | 1  | 48 | M          | Psychotic depression, smoking, alcohol abuse                                      | Unspecified       | Unspecified  | Bizarre behaviour, vomiting, paranoid, delusional, confused                                                              | Water       | "Large amounts"                                                  | 115 | - | Water restriction, normal saline, trifluoperazine                                      | -                                              | Recovery              |  |
| 163 | Rosenbaum et al. 1979   | USA          | Case report 2                    | 1  | 35 | M          | Paranoid schizophrenia                                                            | Antipsychotics    | Acute        | Seizures                                                                                                                 | Total fluid | 20 glasses of water + orange and grapefruit juice and milk       | 116 | - | Phenobarbital, phenytoin, normal saline, water restriction                             | -                                              | Recovery              |  |
| 164 | Rosenbaum et al. 1979   | USA          | Case report 3                    | 1  | 21 | F          | Schizophrenia, psychogenic polydipsia, smoking                                    | Antipsychotics    | Acute        | Seizure, coma                                                                                                            | Water       | "Drinking from shower heads"                                     | 100 | - | Normal saline, water restriction, haloperidol                                          | -                                              | Recovery              |  |
| 165 | Garigan et al. 1999     | USA          | Case report                      | 1  | 18 | M          | Healthy                                                                           | -                 | Acute        | Dizziness, headache, nausea, vomiting, coma, respiratory distress, confused, lethargic, frothy sputum, pulmonary oedema  | Water       | ~20 L/4 hrs                                                      | 115 | - | Normal saline, phenytoin, mannitol                                                     | Sepsis, disseminated intravascular coagulation | Death                 |  |
| 166 | Sjblom et al. 1997      | Sweden       | Case report                      | 1  | 27 | F          | Healthy                                                                           | Unspecified       | Acute        | Vomiting, seizure, exhaustion, unresponsiveness, loss of consciousness, cerebral oedema                                  | Water       | "Drank directly from the tap for 3-4 hrs"                        | 106 | - | Diazepam, hypertonic saline, isotonic saline with potassium, furosemide, betamethasone | -                                              | Death                 |  |
| 167 | Ellinas et al. 1993     | USA          | Retrospective cohort study       | 15 | 42 | 9 M, 6 F   | Schizophrenia, bipolar depression, psychogenic polydipsia, smoking, alcohol abuse | Antipsychotics    | Unspecified  | Seizures, bizarre behaviour, change in mental status,                                                                    | Water       | "Compulsive intake"                                              | 115 | - | Fluid restriction, 3% normal saline (5)                                                | -                                              | Recovery + death (1)  |  |

|     |                            |             |                    |   |    |   |                                                            |                                                   |             | lethargy, respiratory failure                                                                     |             |                                        |     |     |                                                                                                           |                |             |       |
|-----|----------------------------|-------------|--------------------|---|----|---|------------------------------------------------------------|---------------------------------------------------|-------------|---------------------------------------------------------------------------------------------------|-------------|----------------------------------------|-----|-----|-----------------------------------------------------------------------------------------------------------|----------------|-------------|-------|
| 168 | Cosgray et al. 1990        | USA         | Case report        | 1 | 41 | M | Mental impairment                                          | Unspecified                                       | Chronic     | Seizure, withdrawal, confusion, slurred speech                                                    | Water       | "Frequent trips to the water fountain" | 103 | -   | Diazepam, normal saline with potassium supplement                                                         | -              | Recovery    |       |
| 169 | Rao et al. 2011            | India       | Case report        | 1 | 38 | F | Paranoid schizophrenia                                     | Antipsychotics                                    | Chronic     | Delusions, auditory hallucinations, social withdrawal, decreased sleep and appetite               | Water       | 8 L/day                                | 123 | -   | Risperidone, trihexyphenidyl, fluid restriction                                                           | -              | Recovery    |       |
| 170 | Radojevic et al. 2012      | Monte negro | Case report 1      | 1 | 38 | M | Schizophrenia                                              | Unspecified                                       | Unspecified | Brain and lung oedema                                                                             | Water       | "Copious quantities"                   | -   | 112 | -                                                                                                         | -              | -           | Death |
| 171 | Radojevic et al. 2012      | Monte negro | Case report 2      | 1 | 40 | M | Schizophrenia, psychogenic polydipsia                      | Antipsychotics                                    | Acute       | Vomiting, nausea, unable to speak, disturbance of consciousness                                   | Water       | "Large amounts"                        | 98  | -   | -                                                                                                         | -              | -           | Death |
| 172 | McDaniel et al. 2010       | USA         | Case report 1      | 1 | 30 | M | Schizoaffective disorder, cocaine dependence               | Anticonvulsants, antipsychotics, stimulants       | Acute       | Euphoria, rapid speech, mute immobility                                                           | Water       | 17 cups/day                            | 124 | -   | Lorazepam, divalproex, risperidone, demeclocycline, fluid restriction                                     | -              | Recovery    |       |
| 173 | McDaniel et al. 2010       | USA         | Case report 2      | 1 | 58 | F | Bipolar disorder, alcohol abuse                            | Anticonvulsants, benzodiazepines                  | Unspecified | Catatonic, agitated, meaningless activity                                                         | Water       | "Excessive water intake"               | 122 | -   | Fluid restriction, demeclocycline, valproic acid                                                          | -              | Recovery    |       |
| 174 | McDaniel et al. 2010       | USA         | Case report 3      | 1 | 54 | F | Bipolar disorder, psychogenic polydipsia                   | Mood stabilisers, antipsychotics, benzodiazepines | Unspecified | Depressed, hallucinations, delusions, motor excitement followed by muteness and staring           | Total fluid | "Increase in water intake"             | 123 | -   | Resuming regular doses of lithium, increasing lorazepam dose, fluid restriction                           | -              | Recovery    |       |
| 175 | Chen et al. 2006           | China       | Case report        | 1 | 54 | F | Healthy                                                    | Unspecified                                       | Acute       | Vomiting, headache, bizarre behaviour, seizure                                                    | Water       | 6 L                                    | 118 | -   | Furosemide, 3% hypertonic saline, mannitol, bicarbonate                                                   | Rhabdomyolysis | Recovery    |       |
| 176 | Iwazu et al. 2007          | Japan       | Case report        | 1 | 66 | F | Throat inflammation                                        | Antipsychotics, antidepressants                   | Unspecified | Nausea, vomiting, headache, coma, seizures                                                        | Total fluid | 6 L/day                                | 123 | -   | Ringer's lactate, diazepam, phenytoin, azulene gargling                                                   | Rhabdomyolysis | Recovery    |       |
| 177 | Speedy et al. 2000         | New Zealand | Case reports       | 2 | 35 | F | Healthy                                                    | Unspecified                                       | Acute       | Lightheadedness, swollen body, tight skin                                                         | Total fluid | ~9.5 L/12.6 hrs                        | 131 | -   | -                                                                                                         | -              | Recovery    |       |
| 178 | Shevitz et al. 1980        | USA         | Case report        | 1 | 43 | F | Schizophrenia, multiple drug abuse, psychogenic polydipsia | Unspecified                                       | Unspecified | Respiratory failure, acute renal failure, suspicious, uncooperative, fainting episodes, seizure   | Water       | ~15 L/day                              | 114 | -   | Fluid restriction, thioridazine, propranolol, prazosin, hydralazine                                       | -              | Ongoing     |       |
| 179 | Tolan et al. 2001          | Australia   | Case report 1      | 1 | 41 | F | Paranoid schizophrenia                                     | Anticonvulsants, antipsychotics                   | Unspecified | Seizures, loss of consciousness                                                                   | Water       | 10 glasses/day                         | 104 | -   | Hypertonic saline, diuresis, clozapine                                                                    | Rhabdomyolysis | Recovery    |       |
| 180 | Tolan et al. 2001          | Australia   | Case report 2      | 1 | 44 | F | Healthy                                                    | Unspecified                                       | Unspecified | Stupor                                                                                            | Water       | 3 L                                    | 115 | -   | Unspecified                                                                                               | Rhabdomyolysis | Unspecified |       |
| 181 | Penders et al. 2015        | USA         | Case report        | 1 | 49 | M | Schizoaffective disorder                                   | Antipsychotics                                    | Acute       | Altered mental status, delirious, confused, agitated, gait and balance difficulties               | Water       | 8 L/day                                | 101 | -   | Fluid restriction, normal saline infusions, haloperidol, clozapine                                        | -              | Recovery    |       |
| 182 | Olapade-Olaopa et al. 1997 | UK          | Case report 1      | 1 | 64 | M | Healthy                                                    | Unspecified                                       | Acute       | Collapsed                                                                                         | Total fluid | 7 L/6 hrs                              | 116 | -   | Unspecified                                                                                               | -              | Recovery    |       |
| 183 | Olapade-Olaopa et al. 1997 | UK          | Case report 2      | 1 | 59 | M | UTI                                                        | -                                                 | Acute       | Seizure                                                                                           | Total fluid | 15-18 L/24 hrs                         | 113 | -   | Unspecified                                                                                               | -              | Recovery    |       |
| 184 | Funayama et al. 2011       | Japan       | Letter/case report | 1 | 58 | M | Schizophrenia                                              | Antipsychotics                                    | Chronic     | Mild disorientation, agitation                                                                    | Water       | > 10 L/day                             | 100 | -   | 0.9% normal saline, fluid restriction                                                                     | CPM            | Recovery    |       |
| 185 | Fleischhacker et al. 1987  | Austria     | Case report        | 1 | 47 | F | Paranoid schizophrenia                                     | -                                                 | Acute       | Somnolent, seizures, vomiting, bizarre behaviour                                                  | Water       | "Large amounts"                        | 101 | -   | 5% hypertonic saline, furosemide, potassium supplement, doxycycline, dexamethasone, phenytoin, cimetidine | -              | Recovery    |       |
| 186 | Bayir et al. 2012          | Turkey      | Case report        | 1 | 51 | F | Major depression                                           | -                                                 | Acute       | Confused, disoriented, altered consciousness, agitated, headaches, cardiovascular arrest, seizure | Water       | 12 L/4 hrs                             | 107 | -   | Magnesium, 3% NaCl, KCl, diazepam, antidepressants                                                        | -              | Recovery    |       |



|     |                        |              |                            |    |             |             |                                                                             |                                                                    |              |                                                                                        |             |                                               |     |   |                                                                                                     |                                                |             |
|-----|------------------------|--------------|----------------------------|----|-------------|-------------|-----------------------------------------------------------------------------|--------------------------------------------------------------------|--------------|----------------------------------------------------------------------------------------|-------------|-----------------------------------------------|-----|---|-----------------------------------------------------------------------------------------------------|------------------------------------------------|-------------|
| 187 | Weiss 2004             | USA          | Case report                | 1  | 71          | F           | Dry throat                                                                  | Antihypertensives                                                  | Chronic      | Weak, dizzy                                                                            | Water       | 8 L/day                                       | 116 | - | Normal saline, fluid restriction (1 L/day), foscipril                                               | -                                              | Recovery    |
| 188 | Diamond et al. 2003    | USA          | Case report                | 1  | 43          | M           | Healthy                                                                     | -                                                                  | Acute        | Combative, confused, foaming at the mouth, lethargic                                   | Water       | 5 gallons/few hrs                             | 114 | - | 3% saline                                                                                           | Rhabdomyolysis                                 | Recovery    |
| 189 | Su et al. 2012         | Australia    | Case report                | 1  | 82          | M           | Depression, lower UTI                                                       | Antidepressants                                                    | Acute        | Confusion, difficulty finding words                                                    | Water       | 3 L/4 hrs                                     | 114 | - | Fluid restriction (800 mL/day)                                                                      | -                                              | Ongoing     |
| 190 | Leban et al. 2016      | Slovenia     | Case report                | 1  | 44          | F           | Healthy                                                                     | Unspecified                                                        | Acute        | Dizziness, confusion, vomiting, weakness, nausea, muscle cramps, delusional, seizure   | Water       | ~6 L/9 hrs                                    | 116 | - | 0.9% sodium chloride, water restriction                                                             | Rhabdomyolysis                                 | Recovery    |
| 191 | Kawashima et al. 2015  | Japan        | Case report 1              | 1  | 22          | M           | Intellectual disability                                                     | Unspecified                                                        | Chronic      | Vomiting                                                                               | Water       | "Large amounts"                               | 108 | - | -                                                                                                   | -                                              | Death       |
| 192 | Kawashima et al. 2015  | Japan        | Case report 2              | 1  | 23          | M           | Intellectual disability, psychogenic polydipsia                             | Antipsychotics                                                     | Chronic      | Diarrhoea, vomiting                                                                    | Water       | "Large amounts"                               | 100 | - | -                                                                                                   | -                                              | Death       |
| 193 | Kruse 1993             | USA          | Case report                | 1  | 54          | M           | Intractable hiccups, diabetes, psychiatric disorder, psychogenic polydipsia | Mood stabilisers, antipsychotics, anticholinergics                 | Unspecified  | Hiccups, fatigue, agitation                                                            | Water       | "Frequent trips to the water fountain"        | 124 | - | Unspecified                                                                                         | -                                              | Unspecified |
| 194 | Cosgray et al. 1993    | USA          | Cohort study               | 9  | 38          | Unspecified | Schizophrenia, smoking                                                      | Antipsychotics                                                     | Unspecified  | Unspecified                                                                            | Water       | "Excessive water intake"                      | 124 | - | Fluid restriction (3 L/day), behavioural therapy                                                    | -                                              | Recovery    |
| 195 | Cortejoso et al. 2014  | Spain        | Case report                | 1  | 61          | M           | Type II diabetes                                                            | Antihypertensives                                                  | Chronic      | Semi-consciousness, repetitive language, short-term memory loss, lower limb oedema     | Water       | "Excessive water intake"                      | 123 | - | Fluid restriction                                                                                   | -                                              | Recovery    |
| 196 | Thomas et al. 2001     | USA          | Case report                | 1  | 48          | M           | Intractable hiccups                                                         | Antipsychotics, antihypertensives                                  | Chronic      | Nausea, vomiting, seizures, anxiety, irritability                                      | Water       | 10 L/day                                      | 105 | - | Behavioural therapy                                                                                 | -                                              | Recovery    |
| 197 | Scotney et al. 2015    | Australia    | Case report                | 1  | Unspecified | Unspecified | Healthy                                                                     | NSAIDs                                                             | Asymptomatic | Asymptomatic                                                                           | Total fluid | ~5.3 L/11 hrs                                 | 132 | - | Unspecified                                                                                         | -                                              | Unspecified |
| 198 | Nixon et al. 1982      | USA          | Case report                | 1  | 24          | F           | Schizophrenia                                                               | Antipsychotics, anticholinergics                                   | Chronic      | Seizures, coma, vomiting                                                               | Total fluid | 15-20 L/day                                   | 115 | - | Demeclocycline                                                                                      | -                                              | Recovery    |
| 199 | Chong et al. 1997      | Singapore    | Retrospective cohort study | 14 | 49          | 10 M, 4 F   | Schizophrenia, diabetes mellitus                                            | Anticonvulsants, mood stabilisers, antipsychotics, antidepressants | Unspecified  | Unspecified                                                                            | Total fluid | "Excessive water intake"                      | 125 | - | Unspecified                                                                                         | -                                              | Unspecified |
| 200 | Goldman 1999           | USA          | Case report                | 1  | 39          | M           | Schizophrenia                                                               | Antipsychotics, anticonvulsants, anticholinergics                  | Chronic      | Delirium, seizures, aggression                                                         | Total fluid | ~9-15 L/day                                   | 115 | - | Cortisol                                                                                            | -                                              | Ongoing     |
| 201 | Moskowitz 1992         | USA          | Case report                | 1  | 42          | F           | Schizophrenia, psychogenic polydipsia                                       | Antipsychotics, anticholinergics                                   | Chronic      | Collapsed, agitated, unresponsive                                                      | Total fluid | 7 L/day                                       | 115 | - | Foley catheter, 0.9% sodium chloride, water restriction                                             | Rhabdomyolysis, nephrogenic diabetes insipidus | Ongoing     |
| 202 | Simmons et al. 2007    | USA          | Case report                | 1  | 68          | F           | Depression, epilepsy                                                        | Antidepressants, anticonvulsants                                   | Chronic      | Altered mental status, abdominal pain, confusion                                       | Water       | 2-3 gallons/day + 2 L over 3 hrs in emergency | 118 | - | Fluid restriction (2 L/day)                                                                         | -                                              | Recovery    |
| 203 | Lipsky et al. 1987     | USA          | Letter/case report         | 1  | 64          | F           | -                                                                           | -                                                                  | Acute        | Weakness, disoriented, aphasic                                                         | Water       | ~1.4 L/1-2 hrs                                | 123 | - | 3% saline, 5% glucose in normal saline                                                              | -                                              | Recovery    |
| 204 | Looi et al. 1995       | Australia    | Case report                | 1  | 43          | M           | Schizoaffective disorder, smoking, diabetes insipidus                       | Mood stabilisers, antipsychotics, benzodiazepines                  | Chronic      | Low mood, concentration difficulties, slurred speech, disorientated, unsteady, seizure | Water       | 16 L/day                                      | 120 | - | Water restriction (1 glass/hr), normal saline, all psychotropic medications discontinued, midazolam | -                                              | Recovery    |
| 205 | Shiwach 1996           | USA          | Letter/case report         | 1  | 88          | F           | -                                                                           | Unspecified                                                        | Acute        | Confusion, disorientation, poor attention                                              | Water       | 4 L/2 hrs                                     | 118 | - | Hypertonic saline                                                                                   | -                                              | Recovery    |
| 206 | Whitchurch et al. 2011 | Australia    | Letter/case report         | 1  | 42          | F           | Bipolar affective disorder                                                  | Unspecified                                                        | Unspecified  | Paranoid delusions, increased pressure of speech                                       | Water       | Several litres/day                            | 123 | - | Olanzapine, lorazepam, fluid restriction (2 L/day), oral sodium chloride tablets                    | -                                              | Recovery    |
| 207 | Wicke et al. 2017      | Germany      | Case report                | 1  | 44          | F           | Major depressive disorder                                                   | Antidepressants                                                    | Unspecified  | Impaired consciousness, confusion                                                      | Water       | "Overhydration"                               | 102 | - | Saline                                                                                              | CPM                                            | Recovery    |
| 208 | Noakes et al. 2001     | South Africa | Case report                | 1  | Unspecified | M           | Healthy                                                                     | Unspecified                                                        | Acute        | Confusion, semi-comatose                                                               | Total fluid | ~15 L/10 hrs                                  | 123 | - | Furosemide, normal saline                                                                           | -                                              | Recovery    |
| 209 | Kathol et al. 1985     | USA          | Case report 1              | 1  | 31          | M           | Disorganised schizophrenia                                                  | Unspecified                                                        | Chronic      | Unspecified                                                                            | Water       | 8 L/day                                       | 125 | - | Propranolol, molindone hydrochloride                                                                | -                                              | Recovery    |



|     |                      |             |                                  |    |             |          |                                                                |                                 |             |                                                  |             |                                  |     |   |                                                                                                |                |                        |
|-----|----------------------|-------------|----------------------------------|----|-------------|----------|----------------------------------------------------------------|---------------------------------|-------------|--------------------------------------------------|-------------|----------------------------------|-----|---|------------------------------------------------------------------------------------------------|----------------|------------------------|
| 210 | Kathol et al. 1985   | USA         | Case report 2                    | 1  | 42          | M        | Organic mental disorder                                        | Anticonvulsants, antipsychotics | Chronic     | Seizures, hallucinations                         | Water       | 18 L/day                         | 123 | - | Thiothixene discontinued, propranolol, captopril, haloperidol, phenytoin, primidone            | -              | Ongoing                |
| 211 | Kathol et al. 1985   | USA         | Case report 3                    | 1  | 56          | M        | Disorganised schizophrenia                                     | Antihypertensives               | Chronic     | Seizures                                         | Total fluid | > 8 L/day                        | 120 | - | Propranolol, demeclocycline, thiothixene, behavioural therapy                                  | -              | Ongoing                |
| 212 | Lyster et al. 1994   | USA         | Letter/case reports              | 4  | 48          | 3 M, 1 F | Schizophrenia                                                  | Antipsychotics                  | Unspecified | Unspecified                                      | Water       | "Excessive water intake"         | 119 | - | Clozapine                                                                                      | -              | Recovery               |
| 213 | Worthley 1975        | Australia   | Case report                      | 1  | 67          | F        | Smoking                                                        | -                               | Acute       | Vomiting, loss of consciousness, seizure         | Water       | "Excessive water intake"         | 97  | - | Diazepam, frusemide, hypertonic saline                                                         | -              | Recovery               |
| 214 | Dubin et al. 2016    | Israel      | Case report                      | 1  | 58          | M        | Schizophrenia                                                  | Antipsychotics                  | Chronic     | Confused, agitated                               | Water       | "Excessive water intake"         | 110 | - | Hypertonic saline                                                                              | Rhabdomyolysis | Recovery               |
| 215 | Wicki et al. 1998    | Switzerland | Case report                      | 1  | 42          | M        | Paranoid schizophrenia                                         | Antipsychotics                  | Chronic     | Seizure, drowsy, anxious, visual hallucinations  | Water       | "Compulsive intake"              | 120 | - | Diazepam, haloperidol, desmopressin, hyperosmolar sodium, clozapine restarted                  | -              | Recovery               |
| 216 | Zaidi 2005           | USA         | Case report                      | 1  | 50          | M        | Paranoid schizophrenia, smoking, psychogenic polydipsia        | Antipsychotics                  | Chronic     | Restless, behavioural changes, seizures          | Water       | "Excessive water intake"         | 112 | - | Haloperidol, 0.9% normal saline, 3% NaCl, water restriction (< 1 L/day), ziprasidone restarted | Rhabdomyolysis | Recovery               |
| 217 | Allon et al. 1990    | USA         | Case report 1                    | 1  | 53          | F        | Schizophrenia, smoking                                         | Antipsychotics                  | Chronic     | Seizure                                          | Water       | "Excessive water intake"         | 112 | - | Fluid restriction, loxapine restarted                                                          | -              | Recovery               |
| 218 | Allon et al. 1990    | USA         | Case report 2                    | 1  | 39          | M        | Schizophrenia, smoking                                         | Unspecified                     | Unspecified | Seizure                                          | Water       | "Compulsive intake"              | 106 | - | Fluid restriction                                                                              | -              | Recovery               |
| 219 | Ripley et al. 1989   | Canada      | Retrospective case-control study | 17 | Unspecified | M        | Schizophrenia, psychogenic polydipsia                          | Unspecified                     | Unspecified | Seizures, incoordination, ataxia, confusion      | Water       | 5-10 L/day                       | 120 | - | Unspecified                                                                                    | -              | Unspecified            |
| 220 | Amstrong et al. 1993 | USA         | Case report                      | 1  | 21          | M        | Healthy                                                        | Unspecified                     | Acute       | Fatigue, nausea                                  | Total fluid | "Overhydration"                  | 122 | - | 5% hypertonic saline, overnight fluid restriction                                              | -              | Recovery               |
| 221 | Woodard et al. 1992  | USA         | Letter/case report               | 1  | 76          | F        | Diabetes mellitus                                              | Antihypertensives               | Chronic     | Nausea, vomiting                                 | Water       | Gallons/day                      | 114 | - | Normal saline, hydrochlorothiazide discontinued, water restriction                             | -              | Recovery               |
| 222 | Takagi et al. 2011   | Japan       | Cohort study                     | 5  | 52          | 3 M, 2 F | Schizophrenia, mental retardation, epilepsy, organic psychosis | Unspecified                     | Unspecified | Auditory hallucinations, seizures, hyperactivity | Total fluid | "Excessive fluid intake"         | 129 | - | Acetazolamide                                                                                  | -              | Recovery + ongoing (1) |
| 223 | Friedman et al. 1983 | Israel      | Case report                      | 1  | 28          | M        | Lower urinary tract obstruction                                | -                               | Acute       | Nausea, vomiting, restlessness, convulsions      | Water       | 4 L/day + 30-40 glasses in 5 hrs | 117 | - | Suprapubic aspiration, diazepam                                                                | -              | Recovery               |

## Supplemental Data File 3: Full data extraction table

| Case # | Source               |         | Study type                 | Patients |     |              |                                                                                                                                                                                                         | Symptoms    | Fluid                  |                                                                                                                                                                                                                                                                                     | Types of measurement |             | Treatment         |                | Outcome                                                                                                                                                                  |                                                                                   |                                                                                                                                                                                                                                                                                                                                                 |
|--------|----------------------|---------|----------------------------|----------|-----|--------------|---------------------------------------------------------------------------------------------------------------------------------------------------------------------------------------------------------|-------------|------------------------|-------------------------------------------------------------------------------------------------------------------------------------------------------------------------------------------------------------------------------------------------------------------------------------|----------------------|-------------|-------------------|----------------|--------------------------------------------------------------------------------------------------------------------------------------------------------------------------|-----------------------------------------------------------------------------------|-------------------------------------------------------------------------------------------------------------------------------------------------------------------------------------------------------------------------------------------------------------------------------------------------------------------------------------------------|
|        | Author               | Country |                            | Total #  | Age | Gender (M/F) | Medical background                                                                                                                                                                                      |             | Concurrent medications | Onset                                                                                                                                                                                                                                                                               | Types                | Volume      | Serum Na (mmol/L) | Vitreous humor |                                                                                                                                                                          | Types                                                                             | Complications/ side effects                                                                                                                                                                                                                                                                                                                     |
| 1      | Kashiura et al. 2017 | Japan   | Retrospective cohort study | 56       | 53  | 26 M, 30 F   | Medical records from all patients who were admitted to hospital between 2012-2016 with water intoxication were assessed retrospectively. Most patients (51) suffered from an underlying mental disorder | Unspecified | Unspecified            | Convulsions                                                                                                                                                                                                                                                                         | Unspecified          | > 6 L/day   | 110.5             | -              | Water restriction                                                                                                                                                        | Rhabdomyolysis (35)                                                               | Recovery                                                                                                                                                                                                                                                                                                                                        |
| 2      | Pal et al. 2017      | India   | Case report                | 1        | 44  | M            | Patient presented to outpatient department on a background of psychogenic polydipsia presenting with features of parkinsonism, dengue fever, and alcoholism (250 g/week)                                | -           | Chronic                | Slurring of speech, slowness in activities, abnormal posturing of the upper limb, drooling of saliva from the mouth, fever, altered sensorium and thrombocytopenia (26x10 <sup>9</sup> /L). Symptoms subsided after treatment, but on day 6 patient suddenly developed sudden-onset | Water                | 12-15 L/day | 94                | -              | Rapid correction of serum Na with hypertonic saline (3% saline) infusion, levodopa therapy (100-400 mg/day over a period of 2 weeks), psychotherapy (advised to restrict | Osmotic demyelination in bilateral striatum resulting in classical extrapyramidal | Recovery - initial rapid correction of serum Na resulted in improved sensorium and communication, and Na 146 mmol/L, but caused osmotic demyelination on day 6. Patient improved drastically with levodopa therapy and fluid restriction (reduced bradykinesia, tremors and dystonia, Na 136 mmol/L). Complete recovery 1 month after discharge |

|   |                     |        |                    |   |             |   |                                                                                                                                                                                                                                                                                                                                                                 |                                                                                   |             |                                                                                                                                                                                                 |       |                                                                       |     |                             |                                                                                                                                        |                                       |                                                                                                                                                                                                                                                                                                                                                |  |
|---|---------------------|--------|--------------------|---|-------------|---|-----------------------------------------------------------------------------------------------------------------------------------------------------------------------------------------------------------------------------------------------------------------------------------------------------------------------------------------------------------------|-----------------------------------------------------------------------------------|-------------|-------------------------------------------------------------------------------------------------------------------------------------------------------------------------------------------------|-------|-----------------------------------------------------------------------|-----|-----------------------------|----------------------------------------------------------------------------------------------------------------------------------------|---------------------------------------|------------------------------------------------------------------------------------------------------------------------------------------------------------------------------------------------------------------------------------------------------------------------------------------------------------------------------------------------|--|
|   |                     |        |                    |   |             |   |                                                                                                                                                                                                                                                                                                                                                                 |                                                                                   |             | dystonic posturing of the upper limbs. On day 7, he developed dysarthria, dysphagia, significant clumsiness in his routine, bradykinesia, resting tremors and drooling of saliva from the mouth |       |                                                                       |     |                             |                                                                                                                                        | water intake to no more than 3 L/day) | symptoms                                                                                                                                                                                                                                                                                                                                       |  |
| 3 | Suzuki et al. 2016  | Japan  | Case report        | 1 | 52          | M | Patient was found dead in his home. According to family, he frequently complained of polydipsia a few weeks before his death, and had a background of schizophrenia, hypertension and hyperlipidaemia                                                                                                                                                           | Unspecified                                                                       | Acute       | Vomiting                                                                                                                                                                                        | Water | Repeatedly drank a large amount of water                              | 85  | 105 right eye, 107 left eye | Cardiopulmonary resuscitation                                                                                                          | -                                     | Death - forensic autopsy performed 14 hrs after the patient's death revealed moderately congested organs, 700 mL of cadaveric blood, a 494 g heart which retained fluidity, oedematous lungs weighing 479 and 505 g, a large amount of light-brownish liquid in the duodenum and upper jejunum and 50 mL of red-brownish liquid in the stomach |  |
| 4 | De Soto et al. 1985 | USA    | Case report        | 1 | 50          | M | Patient was admitted to hospital for a prostate biopsy where he suffered a grand mal seizure due to hyponatraemia. He had a 25 year history of schizoaffective disorder, and was also diagnosed with benign prostatic hypertrophy, psychogenic polydipsia and nephrogenic diabetes insipidus                                                                    | Lithium carbonate (900-2100 mg/day), fluphenazine decanoate (25 mg) every 2 weeks | Chronic     | Grand mal seizure                                                                                                                                                                               | Water | 20-30 L/day                                                           | 119 | -                           | Moderate water restriction for 1 week                                                                                                  | -                                     | Recovery - urine output of 10 L/day resulting in a 7 pound weight loss over 48 hrs, Na 135 mmol/L                                                                                                                                                                                                                                              |  |
| 5 | Narci 2013          | Turkey | Letter/case report | 1 | 50          | F | Patient was admitted to hospital with a 6 year history of fear, stress and schizophrenia which had recently begun to worsen                                                                                                                                                                                                                                     | Unspecified                                                                       | Acute       | Respiratory distress, confusion and non-cardiogenic pulmonary oedema                                                                                                                            | Water | > 10 L over several hrs                                               | 129 | -                           | 5 ml/min oxygen, 3 mg intravenous morphine, 5 mcg/kg/min nitroglycerin infusion, 400 mg intravenous furosemide, fluid restriction      | -                                     | Recovery - after fluid restriction and intravenous infusion of nitroglycerin and furosemide, the patient excreted a large amount of urine and her symptoms gradually subsided. Patient was discharged after 24 hrs                                                                                                                             |  |
| 6 | Shutty et al. 1993  | USA    | Case report        | 1 | 39          | M | Patient was admitted to a long-stay psychiatric unit with a history of schizophrenia, hyperthyroidism, psychogenic polydipsia, and repeated hospitalisations beginning in early twenties. He had tendencies towards impulsivity, higher energy and poor judgement, but no deficits in orientation, memory or attention were observed                            | Methimazole                                                                       | Acute       | Auditory hallucination, grandiose delusions, and irritability. After 10 months of treatment, patient began reporting that he was "carrying a baby" and that he was his "mother's wife"          | Water | 2.6 L/hr                                                              | 118 | -                           | Thiothixene (20 mg) 3 times a day, lithium (300 mg) 4 times a day, treatment program involving daily monitoring of diurnal weight gain | -                                     | Ongoing - patient continued to experience periodic episodes of excessive water intake leading to hyponatraemia                                                                                                                                                                                                                                 |  |
| 7 | Porter et al. 2007  | UK     | Case report        | 1 | 25          | F | Retail manager presented to the emergency department following a seizure at home. Patient suffered from severe long-term dental pain and analgesics were ineffective. To combat this, the patient continuously held ice cold water in her mouth which she subsequently swallowed. She was diagnosed with acute irreversible pulpitis and psychogenic polydipsia | Ibuprofen (2.6 g) and paracetamol (2 g)                                           | Unspecified | 10 minute seizure, encephalopathy, and generalised behavioural disturbances such as agitation and aggression                                                                                    | Water | Up to 10 L/day                                                        | 123 | -                           | Phenytoin                                                                                                                              | -                                     | Recovery - serum Na normalised after 8 days and patient was discharged with a short course of phenytoin                                                                                                                                                                                                                                        |  |
| 8 | O'Brien et al. 2001 | USA    | Case report 1      | 1 | Unspecified | M | Trainee was admitted to hospital after intensive exercise in hot weather and excessive water intake at the urging of his supervisors                                                                                                                                                                                                                            | Unspecified                                                                       | Acute       | Repeated vomiting, rapidly progressing weakness leading to unresponsiveness, respiratory distress, diffuse pulmonary oedema                                                                     | Water | 10 qt over 2 hrs                                                      | 121 | -                           | Normal saline intravenously, intensive medical care upon admission                                                                     | -                                     | Death - postmortem examination revealed severe cerebral and brainstem oedema and hydrocephalus                                                                                                                                                                                                                                                 |  |
| 9 | O'Brien et al. 2001 | USA    | Case report 2      | 1 | Unspecified | M | Trainee was admitted to hospital after intensive exercise and excessive water intake                                                                                                                                                                                                                                                                            | Unspecified                                                                       | Acute       | Generalised seizures, nausea, vomiting                                                                                                                                                          | Water | 2 qt/hr during the morning, 7 qt over a short period in the afternoon | 124 | -                           | Unspecified                                                                                                                            | -                                     | Recovery - discharged after 4 days of hospitalisation                                                                                                                                                                                                                                                                                          |  |

|    |                     |              |                    |   |             |   |                                                                                                                                                                                                                                                                                                                                                                                                                                                                                     |                                          |               |                                                                                       |                                                                       |                                                                                      |     |   |                                                                               |   |                                                                                                                                                                                               |
|----|---------------------|--------------|--------------------|---|-------------|---|-------------------------------------------------------------------------------------------------------------------------------------------------------------------------------------------------------------------------------------------------------------------------------------------------------------------------------------------------------------------------------------------------------------------------------------------------------------------------------------|------------------------------------------|---------------|---------------------------------------------------------------------------------------|-----------------------------------------------------------------------|--------------------------------------------------------------------------------------|-----|---|-------------------------------------------------------------------------------|---|-----------------------------------------------------------------------------------------------------------------------------------------------------------------------------------------------|
| 10 | O'Brien et al. 2001 | USA          | Case report 3      | 1 | Unspecified | M | Soldier attending a leadership course suffered a seizure after consuming large amounts of water to prevent heat injuries                                                                                                                                                                                                                                                                                                                                                            | Unspecified                              | Acute         | Seizure, light-headedness, weakness, metabolic encephalopathy                         | Water                                                                 | Large quantities                                                                     | 127 | - | Unspecified                                                                   | - | Recovery - the patient's serum Na normalised after several days and he was discharged                                                                                                         |
| 11 | O'Brien et al. 2001 | USA          | Case report 4      | 1 | Unspecified | F | Trainee was admitted to hospital after excessive water consumption                                                                                                                                                                                                                                                                                                                                                                                                                  | Unspecified                              | Acute         | Headache, nausea, vomiting, fatigue                                                   | Water                                                                 | 18-20 qt over 8 hrs                                                                  | 121 | - | Unspecified                                                                   | - | Recovery - patient was discharged after 3 days                                                                                                                                                |
| 12 | O'Brien et al. 2001 | USA          | Case report 5      | 1 | Unspecified | M | Trainee was hospitalised after excessive water consumption                                                                                                                                                                                                                                                                                                                                                                                                                          | Unspecified                              | Acute         | Nausea, dizziness, generalised seizures, tiredness, disorientation                    | Water                                                                 | 10 qt over 4 hrs                                                                     | 123 | - | Unspecified                                                                   | - | Recovery - patient was discharged after several days                                                                                                                                          |
| 13 | O'Brien et al. 2001 | USA          | Case report 6      | 1 | Unspecified | M | Trainee was admitted to hospital after excessive water consumption during a road march                                                                                                                                                                                                                                                                                                                                                                                              | Unspecified                              | Acute         | Weakness, blurred vision, bloated feeling                                             | Water                                                                 | 1 qt/hr during march, 3.7 qt in 30 minutes after discontinuing march                 | 128 | - | Unspecified                                                                   | - | Unspecified                                                                                                                                                                                   |
| 14 | Sato et al. 2018    | Japan        | Letter/case report | 1 | 85          | F | Patient was admitted to hospital after consuming barium for a GI screening x-ray. She had been advised to consume water in order to excrete the barium and subsequently developed hyponatraemia. Despite a moderate level of water intake, water intoxication was given as a diagnosis due to mix of moderate water intake and impaired urinary dilution as evidenced by increased ADH levels. Patient had a history of hypertension, dyslipidaemia and previous lacunar infarction | Nilvadipine, pravastatin and ticlopidine | Acute         | Incoherent speech and tremors in arms                                                 | Water                                                                 | 1 L over 6 hrs                                                                       | 120 | - | Intravenous Na supplementation                                                | - | Recovery - patient's serum Na normalised on day 5 and symptoms subsided on day 7. Water restriction was not necessary in this case                                                            |
| 15 | Noakes et al. 1985  | South Africa | Case report 1      | 1 | 46          | F | A previously healthy patient who had been running for 3.5 years competed in the Comrades Marathon and developed hyponatraemia after excessive water intake. She was mentally confused when finally removed from the race and couldn't recognise her husband                                                                                                                                                                                                                         | Unspecified                              | Acute         | Watery diarrhoea, confusion, grand mal seizure, coma, generalised muscular hypertonia | Mixture of coca-cola and water                                        | 6 L over 7 hrs                                                                       | 115 | - | Intravenous infusion of 0.9% saline                                           | - | Recovery - patient passed 4 L of urine/day and after 2 days, her mental state had normalised. Serum Na normalised after 3 days, and she was discharged on day 6                               |
| 16 | Noakes et al. 1985  | South Africa | Case report 2      | 1 | 37          | M | An anaesthetist who had been running marathons and ultra-marathons for 3 months competed in the Comrades Marathon and developed a mild muscle cramp. After he noticed himself drifting in and out of consciousness, he admitted himself into hospital to get treatment for what he believed was an electrolyte imbalance                                                                                                                                                            | Unspecified                              | Acute - 5 hrs | Muscle cramps and twitching, lapsing consciousness                                    | Mixture of coca-cola and water, tea and beer                          | 12 L of coca-cola and water mixture over 10 hrs, 500 mL tea and 70 mL beer post-race | 118 | - | 0.9% saline/5% dextrose infusion                                              | - | Recovery - patient passed 2.8 L of urine upon treatment. Saline infusion continued overnight and patient excreted more urine. His serum Na normalised the following day and he was discharged |
| 17 | Noakes et al. 1985  | South Africa | Case report 3      | 1 | 20          | M | A university student suffered a seizure 1 hr after completing the Comrades Marathon due to excessive water intake prompted by a fear of dehydration. He had a history of encephalitis                                                                                                                                                                                                                                                                                               | Unspecified                              | Acute - 1 hr  | Seizure, lapsing consciousness, aggression, profuse sweating, supple neck             | Electrolyte-containing sport drink and mixture of coca-cola and water | 10 L over 9 hrs                                                                      | 124 | - | Etomine and 4 L of intravenous infusion of isotonic (0.9%) saline over 12 hrs | - | Recovery - after 2 hrs of treatment, the patient was fully conscious. The patient excreted 3.8 L of urine over 24 hrs and was discharged after 4 days                                         |
| 18 | Noakes et al. 1985  | South Africa | Case report 4      | 1 | 29          | F | Patient felt bloated and unwell after completing the Comrades Marathon. 10 weeks later she competed in the Durban Triathlon and experienced hyponatremic symptoms. She was subsequently hospitalised                                                                                                                                                                                                                                                                                | Unspecified                              | Chronic       | Bloating, short of breath, weight gain of 4.5 kg during the triathlon                 | Mainly water                                                          | 8 L over 10 hrs                                                                      | 125 | - | Diuretic and slow intravenous infusion of 0.9% saline                         | - | Recovery - the patient's serum Na improved after treatment and she was discharged after 4 days                                                                                                |

|    |                           |        |                       |    |    |           |                                                                                                                                                                                                                                                                                                                                                                                                                                                                                                                                      |                                                         |         |                                                                                                                                  |                                 |                                                                          |     |   |                                                                                                                                                         |                                                                                                                                |                                                                                                                                                                                                                                                                                                                                                                     |
|----|---------------------------|--------|-----------------------|----|----|-----------|--------------------------------------------------------------------------------------------------------------------------------------------------------------------------------------------------------------------------------------------------------------------------------------------------------------------------------------------------------------------------------------------------------------------------------------------------------------------------------------------------------------------------------------|---------------------------------------------------------|---------|----------------------------------------------------------------------------------------------------------------------------------|---------------------------------|--------------------------------------------------------------------------|-----|---|---------------------------------------------------------------------------------------------------------------------------------------------------------|--------------------------------------------------------------------------------------------------------------------------------|---------------------------------------------------------------------------------------------------------------------------------------------------------------------------------------------------------------------------------------------------------------------------------------------------------------------------------------------------------------------|
| 19 | Rae 1976                  | Canada | Case report           | 1  | 53 | F         | Patient was a widow with poorly controlled diabetes who had previously been admitted to a psychiatric hospital and was diagnosed with paranoid schizophrenia. Since then she had lived at home with her mother and seen local psychiatrists. She had a history of severe monilial vaginitis and drank excessive amounts of water because "it cooled her blood"                                                                                                                                                                       | NPH insulin (20 U/d) and trifluoperazine (20 mg)        | Chronic | Rigid limbs, dazed, mute, restless, vomited twice, loss of consciousness, flushed face, dilated pupils, fever, convulsions, coma | Water                           | 6.2 L/day                                                                | 111 | - | 5% glucose and saline, then 3% sodium chloride infusion (750 mL over 7 hrs), 1 L Ringer's lactate, 40 mmol of potassium chloride and paraldehyde (5 mL) | -                                                                                                                              | Recovery - patient's condition improved after treatment, her serum Na normalised and she was conscious and talking the next morning. She discharged herself after 2 days, but returned 3 days stating that she had reduced her water intake to 1.7 L/day. She was 4.5 kg lighter                                                                                    |
| 20 | Chapman et al. 2008       | UK     | Case report           | 1  | 37 | F         | A previously well patient presented with symptoms resembling eclampsia during labour. She had an uncomplicated pregnancy and normal blood pressure, however had been drinking more water recently because of the hot weather, fear of dehydration and feelings of thirst                                                                                                                                                                                                                                                             | Unspecified                                             | Acute   | Confusion, tonic-clonic seizure                                                                                                  | Water                           | > 4 L/day                                                                | 111 | - | Hypertonic saline. Due to the acute nature of her illness, fluid restriction was not considered                                                         | -                                                                                                                              | Recovery - the patient made a full recovery and serum Na normalised to 138 mmol/L by day 14                                                                                                                                                                                                                                                                         |
| 21 | Davis et al. 2001         | USA    | Cross-sectional study | 26 | 40 | 3 M, 23 F | Medical records from all patients in the 1998 Suzuki Rock 'N' Roll Marathon who presented to emergency departments with hyponatraemia were assessed retrospectively. Hyponatraemic patients were more likely to be female, use NSAIDs, drink "as much as possible" and have slower running times                                                                                                                                                                                                                                     | Unspecified                                             | Acute   | Nausea, vomiting, weakness, confusion, dizziness, seizures, altered mental status                                                | Bottled water and sports drinks | Drank "as much fluid as possible", exceeding race packet recommendations | 125 | - | Normal saline, 3% HTS for severe cases                                                                                                                  | 3 patients developed seizures and altered mental status requiring intubation for airway protection following initial treatment | Recovery - all patients eventually recovered and were discharged, with the most severe cases requiring 3% HTS                                                                                                                                                                                                                                                       |
| 22 | Goldman 1994              | USA    | Case report           | 1  | 38 | F         | Patient had a history of schizoaffective disorder, bradycardia and 10-year history of polydipsia, but was otherwise in good physical health. Her first hyponatraemic episode was in 1990 when she suffered a seizure. She had more seizures and presentations to ED in the years following but no causal factors were identified. Following the last exacerbation of her illness, she was admitted to a mental health centre where 3 months after admission she was found in a toilet stall upright against the wall, pupils dilated | Lithium, mesoridazine (250 mg/day) and lorazepam (1 mg) | Chronic | Lightheadedness, seizures, dilated pupils, diffuse anoxia, mild oedema                                                           | Unspecified                     | Unspecified                                                              | 119 | - | Fluid restriction, isotonic saline and inotropic agents                                                                                                 | -                                                                                                                              | Death - patient was transferred to the intensive care unit of a nearby hospital after her last hyponatraemic event. She died the day after admission with an unclear cause of death. Patient was believed to have died from the concurrent events of hyponatraemia and a vasovagal episode inducing a fatal arrhythmia (with lithium being a potential contributor) |
| 23 | Budisavljevic et al. 2003 | USA    | Case report           | 1  | 18 | F         | A previously healthy patient was admitted to ICU with altered mental status. She had taken a tablet of ecstasy the night before and consumed an excessive amount of water due to increased thirst                                                                                                                                                                                                                                                                                                                                    | Unspecified                                             | Acute   | Anxiety, remorse, agitation, visual hallucinations, vomited several times, lethargy and loss of responsiveness                   | Water                           | "A lot"                                                                  | 124 | - | 1 L normal saline over 8 hrs, 480 mL of 5% saline intravenously                                                                                         | -                                                                                                                              | Recovery - over the next 24 hrs the patient excreted 4500 mL of urine and her serum Na normalised. Her mental status recovered and she was discharged                                                                                                                                                                                                               |

|    |                       |        |                            |    |    |          |                                                                                                                                                                                                                                                                                                                                                                             |                                                                                                           |             |                                                                                                                                                                                                                                          |                                                   |                                                                               |     |   |                                                                                                        |                                              |                                                                                                                                                                                                                                                                                                                                                                                                     |
|----|-----------------------|--------|----------------------------|----|----|----------|-----------------------------------------------------------------------------------------------------------------------------------------------------------------------------------------------------------------------------------------------------------------------------------------------------------------------------------------------------------------------------|-----------------------------------------------------------------------------------------------------------|-------------|------------------------------------------------------------------------------------------------------------------------------------------------------------------------------------------------------------------------------------------|---------------------------------------------------|-------------------------------------------------------------------------------|-----|---|--------------------------------------------------------------------------------------------------------|----------------------------------------------|-----------------------------------------------------------------------------------------------------------------------------------------------------------------------------------------------------------------------------------------------------------------------------------------------------------------------------------------------------------------------------------------------------|
| 24 | Parkinson et al. 2013 | UK     | Case report                | 1  | 62 | M        | Patient was admitted for a left carotid endarterectomy to treat a TIA. He had a background of mild gastro-oesophageal reflux disease and urinary hesitancy. His serum Na was 127 mmol/L postoperatively, but deteriorated after he developed urinary retention and drank excessive amounts of water (Na = 107 mmol/L)                                                       | Heparin, antibiotic prophylaxis, oral antihypertensives, epinephrine                                      | Acute       | Headache, nausea, confusion, dysphasia, tonic-clonic seizure, pulseless electrical activity cardiac arrest                                                                                                                               | Water                                             | 5-7 L/day                                                                     | 127 | - | Urinary catheter, fluid restriction                                                                    | -                                            | Recovery - patient's serum Na normalised by day 3                                                                                                                                                                                                                                                                                                                                                   |
| 25 | Adetoki et al. 2013   | UK     | Case report                | 1  | 49 | M        | Patient had a history of treatment resistant paranoid schizophrenia and was admitted to hospital following an acute relapse. He had poor compliance with medication                                                                                                                                                                                                         | Olanzapine (10 mg/day) clonazepam (0.5 mg) 4 times daily, depot pipotiazine palmitate (25 mg)             | Acute       | Anxiety, agitation, violent behaviour, visual and auditory hallucinations, vomiting, confusion, tonic-clonic seizure, cerebral oedema                                                                                                    | Water                                             | "Copious quantities"                                                          | 109 | - | Conservative management (sedation, electrolyte corrections, antibiotics and physiotherapy), intubation | -                                            | Recovery - patient's serum Na normalised and he was discharged back to the psychiatric ward. No further polydipsia was observed and his mental state stabilised, after which he was discharged to a nursing home                                                                                                                                                                                    |
| 26 | Hsu et al. 2005       | Taiwan | Retrospective cohort study | 11 | 49 | 2 M, 9 F | Medical records from all patients at a hospital in Taipei were reviewed to identify cases of acute hyponatraemia between January 2001 and December 2002. The estimated amount of daily water intake was gathered from the patients or their family members. Medical backgrounds varied from induced abortion to colonoscopy, drug abuse (MDMA), hypertension and polydipsia | Oxytocin, MDMA, polyethylene glycol, haloperidol, amisulpride, clonazepam, hydrochlorothiazide, amiloride | Acute       | Bizarre behaviour, delirium, grand mal seizures                                                                                                                                                                                          | Water and herbal weight reduction teas            | 2.5-10 L/day                                                                  | 115 | - | Hypertonic saline (4 patients also had combination treatment with furosemide)                          | -                                            | Recovery - no patients displayed any neurological sequelae after treatment and all recovered mental status                                                                                                                                                                                                                                                                                          |
| 27 | Akasaki et al. 1993   | Japan  | Case report                | 1  | 54 | F        | Patient was admitted to hospital following convulsions and a coma. She had previously been diagnosed with schizophrenia and had been hospitalised at psychiatric institutions in the past                                                                                                                                                                                   | Spiperone (6 mg/day)                                                                                      | Chronic     | Auditory hallucination, delusion of persecution, flattening of affect, insomnia, convulsions, coma                                                                                                                                       | Water                                             | "Large quantity of water to satisfy her thirst during the previous two years" | 116 | - | IV maintenance fluid, methylprednisolone sodium succinate, sodium chloride                             | -                                            | Recovery - patient excreted 8850 mL of urine on the first day, her consciousness level became normal over the next few days and her serum Na stabilised by the 3rd day                                                                                                                                                                                                                              |
| 28 | Vieweg et al. 1985    | USA    | Case report 2              | 1  | 52 | F        | Patient was initially hospitalised with schizophrenia                                                                                                                                                                                                                                                                                                                       | Chlorpromazine, thioridazine, haloperidol                                                                 | Unspecified | Unspecified                                                                                                                                                                                                                              | Unspecified                                       | Unspecified                                                                   | 110 | - | Unspecified                                                                                            | -                                            | Death - autopsy findings revealed visceral edema                                                                                                                                                                                                                                                                                                                                                    |
| 29 | Vieweg et al. 1985    | USA    | Case report 4              | 1  | 45 | F        | Patient was initially hospitalised with schizophrenia complicated by epilepsy                                                                                                                                                                                                                                                                                               | Chlorpromazine, trifluoperazine, antiseizure medication                                                   | Unspecified | Distended abdomen, found on floor "unresponsive"                                                                                                                                                                                         | Water                                             | "Drinking water excessively"                                                  | 115 | - | Unspecified                                                                                            | -                                            | Death - 2 days after being found unresponsive, the patient was found dead in bed. An autopsy was not performed                                                                                                                                                                                                                                                                                      |
| 30 | Vieweg et al. 1985    | USA    | Case report 5              | 1  | 24 | M        | Patient was initially hospitalised with schizophrenia. He experienced recurrent episodes of polydipsia and polyuria over the past year                                                                                                                                                                                                                                      | Antipsychotic agents                                                                                      | Chronic     | Hyposthenuria, agitation, nausea, vomiting, seizures, found unconscious in the bathroom                                                                                                                                                  | Unspecified                                       | Unspecified                                                                   | 110 | - | Unspecified                                                                                            | -                                            | Death - patient was found unconscious in the bathroom. He was believed to be in status epilepticus and expired after several hrs of seizures. An autopsy was not performed                                                                                                                                                                                                                          |
| 31 | Algahtani et al. 2008 | Canada | Case report                | 1  | 25 | F        | Patient had a diagnosis of gastric B-cell lymphoma and presented to hospital with abdominal pain, nausea, vomiting, asthenia and an epigastric mass. No other medical history were specified. Her hyponatraemia was corrected rapidly, and she improved. However, 6 days later she deteriorated due to central pontine and extrapontine myelinolysis                        | Unspecified                                                                                               | Unspecified | Deterioration of level of awareness, lethargy, failure to thrive, spastic quadriplegia, hypertonia, clonus, bilateral Babinski sign, extra-pyramidal signs in form of rigidity and tremor, central pontine and extrapontine myelinolysis | Holy water Zamzam (natural well water in Makka h) | Restricted diet to only drinking holy water, Zamzam                           | 109 | - | Saline infusion, intubation, mechanical ventilation, chemotherapy, radiotherapy                        | Rapid correction of hyponatraemia caused CPM | Death - patient's serum Na normalised to 136 mmol/L within 36 hrs and her mental function improved. However, she deteriorated 6 days later from central pontine and extrapontine myelinolysis, and required intubation and mechanical ventilation. When she improved, she received chemotherapy and radiotherapy, however died 3 months later due to a combination of the myelinolysis and lymphoma |
| 32 | Hiramatsu et al. 2007 | Japan  | Case report                | 1  | 50 | F        | Patient presented to emergency department with severe fatigue and nausea. She had consumed excessive water intake due to worry about lower urinary tract                                                                                                                                                                                                                    | Levofloxacin (100 mg) 15 hrs before admission                                                             | Acute       | Severe fatigue, nausea                                                                                                                                                                                                                   | Water                                             | 4 L in 3 hrs                                                                  | 124 | - | Saline infusion with 10 mmol/L KCl                                                                     | -                                            | Recovery - patient's serum Na normalised by day 3 (141 mmol/L) and her symptoms disappeared                                                                                                                                                                                                                                                                                                         |

|    |                           |           |                    |   |    |   |                                                                                                                                                                                                                                                                                                                                                                             |                                                                                                                                                              |             |                                                                            |       |                                                                     |     |   |                                                                                                                                                                        |                                                                                                                                                  |                                                                                                                                                                                                                                                                                              |
|----|---------------------------|-----------|--------------------|---|----|---|-----------------------------------------------------------------------------------------------------------------------------------------------------------------------------------------------------------------------------------------------------------------------------------------------------------------------------------------------------------------------------|--------------------------------------------------------------------------------------------------------------------------------------------------------------|-------------|----------------------------------------------------------------------------|-------|---------------------------------------------------------------------|-----|---|------------------------------------------------------------------------------------------------------------------------------------------------------------------------|--------------------------------------------------------------------------------------------------------------------------------------------------|----------------------------------------------------------------------------------------------------------------------------------------------------------------------------------------------------------------------------------------------------------------------------------------------|
|    |                           |           |                    |   |    |   | infection. No other medical history were specified                                                                                                                                                                                                                                                                                                                          |                                                                                                                                                              |             |                                                                            |       |                                                                     |     |   |                                                                                                                                                                        |                                                                                                                                                  |                                                                                                                                                                                                                                                                                              |
| 33 | Pavalonis et al. 1992     | USA       | Case report        | 1 | 52 | M | Patient was diagnosed with schizophrenia and hospitalised for 20 years. For the first 3 years of hospitalisation, he developed severe polydipsia and polyuria and experienced many episodes of hyponatraemia. He later developed hypotonic bowel and bladder, coronary artery disease complicated by angina pectoris, myocardial infarction and congestive heart failure    | Lithium and phenytoin                                                                                                                                        | Chronic     | Social withdrawal, confusion, auditory hallucinations, delusions           | Fluid | Up to 35 L/day, but 10 L                                            | 130 | - | Non-intensive behavioural intervention using positive reinforcement                                                                                                    | -                                                                                                                                                | Ongoing - patient showed immense improvement after 23 weeks of treatment and at a 1-yr follow-up. His average fluid consumption decreased from 10 L to 4 L/day and incidents of hyponatraemia decreased by 62%                                                                               |
| 34 | Tallis 1989               | Australia | Case report 1      | 1 | 56 | F | Patient was admitted to hospital following increasing confusion and agitation over 24 hrs. She had a history of schizophrenia                                                                                                                                                                                                                                               | Trifluoperazine (1 mg) intermittently                                                                                                                        | Unspecified | Confusion, agitation, generalised convulsion, organic encephalopathy       | Fluid | "History of compulsive fluid intake"                                | 109 | - | Hypertonic (1.8%) saline solution, water restriction supervised by patient's husband                                                                                   | -                                                                                                                                                | Recovery - patient's plasma Na improved over the first 24 hrs (133 mmol/L) and normalised 1 month later (138 mmol/L)                                                                                                                                                                         |
| 35 | Tallis 1989               | Australia | Case report 2      | 1 | 52 | M | Patient presented to hospital in a semi-conscious state after suffering a seizure. He had a history of chronic schizophrenia and lived in a psychiatric institution. The patient had previously been admitted 6 other times with symptomatic hyponatraemia                                                                                                                  | Depot fluphenazine (37.5 mg every 2 weeks), trifluoperazine (25 mg 3 times daily)                                                                            | Chronic     | Semi-consciousness, generalised seizure                                    | Water | "Compulsive drinker of water"                                       | 108 | - | Hypertonic (1.8%) saline solution, demeclocycline (200 mg 3 times daily) recommended                                                                                   | -                                                                                                                                                | Recovery - patient excreted 4.4 L of urine over the first 24 hrs                                                                                                                                                                                                                             |
| 36 | Tallis 1989               | Australia | Case report 3      | 1 | 73 | F | Patient had a history of mild Korsakoff's psychosis and presented to hospital with increasing confusion and agitation. She had been admitted to hospital with hyponatraemia 4 times in the past                                                                                                                                                                             | Amitriptyline (150 mg at night), haloperidol (10 mg at night)                                                                                                | Chronic     | Confusion, agitation                                                       | Water | "Compulsive drinking of water"                                      | 121 | - | Hypertonic (1.8%) saline solution, fluid restriction with increased supervision                                                                                        | -                                                                                                                                                | Recovery - patient's plasma Na increased to 133 mmol/L and her cerebral state improved. She also excreted 3 L of urine                                                                                                                                                                       |
| 37 | Tallis 1989               | Australia | Case report 4      | 1 | 67 | F | Patient presented to hospital unconscious after suffering a convulsion. She had dementia and lived in a psychogeriatric unit                                                                                                                                                                                                                                                | Haloperidol (1 mg 3 times daily)                                                                                                                             | Unspecified | Loss of consciousness, generalised convulsion                              | Water | "Drinking large amounts of water"                                   | 115 | - | Hypertonic (1.8%) saline solution, continuing fluid restriction                                                                                                        | -                                                                                                                                                | Recovery - patient's plasma Na had increased to 138 mmol/L within 36 hrs and she regained consciousness. She also excreted 3.6 L of urine                                                                                                                                                    |
| 38 | Chondrogianis et al. 2009 | Greece    | Letter/case report | 1 | 48 | M | Patient presented to hospital for elective repair of a large incisional hernia. Unremarkable medical history. Patient was reluctant to reveal any information about water drinking habits and refused a recommended psychiatric evaluation. Surgery was postponed until electrolytes were corrected                                                                         | -                                                                                                                                                            | Unspecified | Unspecified                                                                | Water | 8-10 L/day                                                          | 126 | - | Water restriction to 2 L/day                                                                                                                                           | -                                                                                                                                                | Recovery - patient's serum Na normalised to 135 mmol/L over 2 days and he was able to be scheduled for surgery                                                                                                                                                                               |
| 39 | Phull et al. 2011         | UK        | Case report        | 1 | 50 | M | Patient suffered from paranoid schizophrenia and believed that his kidneys were dysfunctional and required 'flushing' out with water. He was admitted to hospital with hyponatraemia where he did not engage with psychological treatment. He was suspected to be drinking toilet water. His diet became increasingly restricted and he lost a significant amount of weight | Aripiprazole (10 mg twice daily), intramuscular haldol (5 mg), intramuscular flupenthixol decanoate, long-acting risperidone, mirtazapine (30 mg once daily) | Unspecified | Thought disorder, depressed, weight loss, loss of consciousness            | Water | Unspecified                                                         | 90  | - | Olanzapine velotabs (5 mg daily), intramuscular olanzapine (10 mg daily). The patient refused oral olanzapine and required a prolonged course of olanzapine injections | Short period of post injection hypotension, which resolved after a few doses and was believed to have been caused by his poor physical condition | Ongoing - patient made a sustained improvement and tolerated the olanzapine, but required it for 155 days. He was eventually transferred to a rehabilitation unit, started on oral olanzapine and discharged to independent accommodation with support from the community mental health team |
| 40 | Chamberlain 2012          | USA       | Case report        | 1 | 40 | M | Patient had paranoid schizophrenia and lived in a group home. He presented to emergency believing that he was                                                                                                                                                                                                                                                               | -                                                                                                                                                            | Unspecified | Bloated, oedema in hands and ankles, labile, paranoid, delusional, seizure | Water | "Large amounts of water in a short time to flush out his system and | 115 | - | Ziprasidone hydrochloride (20 mg) intramuscularly, IV                                                                                                                  | -                                                                                                                                                | Recovery - patient excreted > 10 L of urine in the first 24 hrs of hospitalisation and his serum Na normalised to 135 mmol/L. His                                                                                                                                                            |

|    |                        |     |                            |    |    |             |                                                                                                                                                                                                                                                                                                                                                                                           |                                                                              |               |                                                                                                                                                                                                                                                                                                                                                                                                                                                                                                              |       |                                                                         |     |   |                                                                                                                                                                              |                                                                                            |                                                                                                                                                                                                                                                                                                                                       |
|----|------------------------|-----|----------------------------|----|----|-------------|-------------------------------------------------------------------------------------------------------------------------------------------------------------------------------------------------------------------------------------------------------------------------------------------------------------------------------------------------------------------------------------------|------------------------------------------------------------------------------|---------------|--------------------------------------------------------------------------------------------------------------------------------------------------------------------------------------------------------------------------------------------------------------------------------------------------------------------------------------------------------------------------------------------------------------------------------------------------------------------------------------------------------------|-------|-------------------------------------------------------------------------|-----|---|------------------------------------------------------------------------------------------------------------------------------------------------------------------------------|--------------------------------------------------------------------------------------------|---------------------------------------------------------------------------------------------------------------------------------------------------------------------------------------------------------------------------------------------------------------------------------------------------------------------------------------|
|    |                        |     |                            |    |    |             | "getting a kidney stone". He was initially cooperative but shortly became labile, paranoid and delusional. He paced in his room or rapidly rocked back and forth and struck out a nurse. He required restraints to keep him in place due to his agitation                                                                                                                                 |                                                                              |               |                                                                                                                                                                                                                                                                                                                                                                                                                                                                                                              |       | prevent kidney stones"                                                  |     |   | lorazepam (2 mg), hypertonic saline (3%) infusion at 30 mL/hr until serum Na reached 130 mmol/L, then normal saline 150 mL/hr, propofol (5ug/kg/min), lorazepam, haloperidol |                                                                                            | agitation improved and he was eventually discharged back to his group home                                                                                                                                                                                                                                                            |
| 41 | de Leon et al. 1995    | USA | Case report 2              | 1  | 39 | F           | Patient was diagnosed with schizophrenia and had a 22-year history of psychosis with severe formal thought disorder. She was initially admitted to hospital for unmanageable polydipsia and pica. Over the years, she developed enuresis and hyponatraemia, seizures and appendicitis                                                                                                     | Loxapine (20 mg), lithium (900 mg), phenytoin (400 mg), propranolol (200 mg) | Chronic       | Vomiting, seizures                                                                                                                                                                                                                                                                                                                                                                                                                                                                                           | Fluid | 15 L/day                                                                | 122 | - | Clozapine (up to 400 mg)                                                                                                                                                     | -                                                                                          | Recovery - patient showed improvement in polydipsia on clozapine, however when medication was discontinued following surgery, she relapsed. This cycle of starting and stopping medication continued, and each time the polydipsia returned until clozapine was restarted                                                             |
| 42 | de Leon et al. 1995    | USA | Case report 4              | 1  | 33 | M           | Patient had chronic paranoid schizophrenia and was stable until 26 when he began to deteriorate. He was hospitalised repeatedly and eventually transferred to a research unit for a dose response study of clozapine in patients with treatment resistant schizophrenia                                                                                                                   | Haloperidol                                                                  | Chronic       | Hostile, assaultive, impulsive outbursts, delusional behaviour, grand mal seizure                                                                                                                                                                                                                                                                                                                                                                                                                            | Water | "Excessive water drinking"                                              | 110 | - | Clozapine (100, 300 and 600 mg/day)                                                                                                                                          | -                                                                                          | Recovery - patient's polydipsia and hyponatraemia significantly improved on clozapine, however would deteriorate whenever he missed doses                                                                                                                                                                                             |
| 43 | Young et al. 1987      | USA | Case report                | 1  | 21 | M           | Patient was a previously healthy marathon runner who developed agitation and delirium 4 hrs after his first marathon which he completed in 5.5 hrs. He displayed no symptoms immediately after the race, but was later found by his friends wandering incoherently around his room                                                                                                        | -                                                                            | Acute - 4 hrs | Agitated, incoherent, delirious, pink frothy sputum, pulmonary oedema, metabolic encephalopathy                                                                                                                                                                                                                                                                                                                                                                                                              | Water | 2 L of water post-race and variable amounts at every water station (16) | 123 | - | Ringer's lactate, 1.5 L of 5% dextrose in normal saline for 1 hr, furosemide                                                                                                 | Acute fulminant pulmonary oedema (partially caused by intravenous administration of fluid) | Recovery - over 72 hrs, the patient's cardiovascular abnormalities and mental status returned to normal                                                                                                                                                                                                                               |
| 44 | el-Mallakh et al. 1990 | USA | Letter/case report         | 1  | 46 | M           | Patient had a 28-year history of paranoid schizophrenia and 2-year history of episodic water intoxication. His past symptoms included auditory hallucinations of past friends, paranoid delusions and thought disorder. He believed that his mother and aunt had been replaced by doubles and were trying to poison him. His medical background included rheumatic fever and hypertension | Fluphenazine (50 mg/day), benzotropine (2 mg/day) orally                     | Chronic       | Seizures and anxiety. During episodes of severe hyponatraemia, he would change aspects of his physical appearance and personality (clothes and hairstyle, deepen voice, develop bold swagger in his gait, angry, arrogant, aggressive, abusive and hostile). He also identified himself by a different name                                                                                                                                                                                                  | Water | "Binge drinking of water"                                               | 127 | - | Lithium (1200 mg/day), neuroleptic                                                                                                                                           | -                                                                                          | Recovery - patient's serum Na normalised and episodes of personality change also became infrequent                                                                                                                                                                                                                                    |
| 45 | Shah et al. 1992       | USA | Retrospective cohort study | 31 | 43 | Unspecified | Patients in a state hospital with hyponatraemia were interviewed and their medical charts reviewed. 26 of the 31 patients had schizophrenia, 1 had schizoaffective disorder and 4 had organic personality disorder. 7 patients had a secondary diagnosis of mental retardation, 1 had encephalitis, and 29 were smokers                                                                   | Anticonvulsants, carbamazepine, diuretics                                    | Unspecified   | Seizures, urinary retention, hypotonic bladder, hydronephrosis, delusions, hallucinations. 1 patient expressed globus hystericus (ball in this throat that would choke him if he didn't drink often), 2 patients had delusions that they needed to drink so that their babies wouldn't die, 4 patients were "flushing out poisons", 1 was "baptising himself", 1 was "regenerating" himself, 1 was "dissolving food", 1 was "cooling something hot", 1 was keeping his "blood thin enough" to reach his head | Water | "Excessive water intake"                                                | 115 | - | Water restriction, salt tablets, environmental changes, behavioural restrictions (controlled drinking times at observation faucets, smoking restrictions, weight checking)   | -                                                                                          | Ongoing - water restriction was an ineffective form of treatment for these patients (2 patients drank their urine when water restricted). However, the behavioural restrictions conducted in a special polydipsia unit were quite successful with patients' monthly serum Na values rising. In 9 months, only 1 patient had a seizure |





|    |                   |         |             |   |    |   |                                                                                                                                                                                                                                                                                                                                                                                                                                                                                                                                                                                                    |                                                                                           |                  |                                                                                                                                                     |       |                                              |     |   |                                                                                          |                                                                                                                                                                     |                                                                                                                                                                                                                                |                                                                                                      |  |  |
|----|-------------------|---------|-------------|---|----|---|----------------------------------------------------------------------------------------------------------------------------------------------------------------------------------------------------------------------------------------------------------------------------------------------------------------------------------------------------------------------------------------------------------------------------------------------------------------------------------------------------------------------------------------------------------------------------------------------------|-------------------------------------------------------------------------------------------|------------------|-----------------------------------------------------------------------------------------------------------------------------------------------------|-------|----------------------------------------------|-----|---|------------------------------------------------------------------------------------------|---------------------------------------------------------------------------------------------------------------------------------------------------------------------|--------------------------------------------------------------------------------------------------------------------------------------------------------------------------------------------------------------------------------|------------------------------------------------------------------------------------------------------|--|--|
|    |                   |         |             |   |    |   |                                                                                                                                                                                                                                                                                                                                                                                                                                                                                                                                                                                                    |                                                                                           |                  |                                                                                                                                                     |       |                                              |     |   |                                                                                          |                                                                                                                                                                     |                                                                                                                                                                                                                                | abnormal electrolytes/weight gain), zotepine (100 mg/day), valproate (700 mg/day), clonazepam (5 mg) |  |  |
| 53 | Lee et al. 2016   | UK      | Case report | 1 | 59 | F | Patient presented to emergency with symptoms related to a UTI. Her partner reported that she had woken up over the weekend with dysuria and abdominal back pain which she believed was related to her recurrent UTI. As a result, the patient consumed excessive amounts of water based on medical advice she recalled from the past. The patient had no other medical history                                                                                                                                                                                                                     | Unspecified                                                                               | Acute - same day | Shaky, muddled, rapid and shallow breathing, word finding difficulties                                                                              | Water | "Several litres of water throughout the day" | 123 | - | Fluid restriction (1 L/day)                                                              | -                                                                                                                                                                   | Recovery - by the next morning, patient's symptoms had improved. Her serum Na normalised after 13 hrs and she was discharged the same day                                                                                      |                                                                                                      |  |  |
| 54 | Roche et al. 2018 | Ireland | Case report | 1 | 65 | F | Patient had history of locally invasive squamous cell carcinoma of the tongue and oesophagus and lupus. She was admitted for a resection of the tongue tumour where initial biochemistry reported a low serum Na level. Patient revealed an increased intake of water due to taking crushed tablets for her postoperative dysphagia                                                                                                                                                                                                                                                                | Betamethasone 0.1% w/w topical steroid cream, crushed tablets for postoperative dysphagia | Unspecified      | Anergia, daytime fatigue, low mood and anorexia                                                                                                     | Water | 3 L/day                                      | 119 | - | Glucocorticoid replacement therapy, hydrocortisone therapy, water restriction            | -                                                                                                                                                                   | Recovery - after returning to whole tablet form, the patient's water intake reduced and with appropriate therapy her serum Na normalised                                                                                       |                                                                                                      |  |  |
| 55 | Snell et al. 2008 | UK      | Case report | 1 | 25 | M | Patient presented to emergency after suffering a seizure. He had a history of X-linked adrenal hypoplasia congenita with hypogonadotropic hypogonadism and was non-compliant with his adrenal replacement therapy. He also occasionally took MDMA                                                                                                                                                                                                                                                                                                                                                  | MDMA                                                                                      | Acute - same day | Tonic-clonic seizure, mild respiratory symptoms, agitation                                                                                          | Water | > 6L/day                                     | 114 | - | IV hydrocortisone, mannitol, hypertonic saline (2.7% sodium chloride) then normal saline | Rapidly progressive pseudobulbar palsy with dysarthria, drooling secretions and dysphagia - possible signs of central pontine myelinolysis or osmotic demyelination | Recovery - over a few days of hospitalisation, the patient made a full recovery                                                                                                                                                |                                                                                                      |  |  |
| 56 | Coler et al. 2012 | USA     | Case report | 1 | 85 | M | Patient was an experienced hiker and retired internal medicine physician who went on an overnight hike through Yosemite National Park with his son who was also an internal medicine physician. He had a history of hypertension, mild renal insufficiency and diastolic dysfunction, and had previously undergone surgery for an aortic valve replacement and pacemaker implantation. The son was initially worried that his father was dehydrated and encouraged him to "push fluids" and snack on small bits of chocolate and beef jerky. However, after developing serious symptoms related to | Losartan (50 mg), hydrochlorothiazide (12.5 mg), nadolol (40 mg)                          | Acute - same day | Sleepy, confused, mumbling incoherently, unable to follow directions or respond properly, agitated, short of breath, dilated external jugular veins | Water | 3 L over 9 hrs                               | 120 | - | 0.9% saline, IV bolus furosemide (20 mg)                                                 | -                                                                                                                                                                   | Recovery - patient deteriorated after 0.9% saline, but showed marked improvement after the IV bolus furosemide. He excreted 500 mL urine immediately and was discharged 2 days later without recurrence or neurologic sequelae |                                                                                                      |  |  |

|    |                          |             |             |   |    |   |                                                                                                                                                                                                                                                                                                                                                                                                                                                                                          |                                                             |                 |                                                                                       |       |                                                                                                    |     |   |                                                                                                                         |                |                                                                                                                                                                                                                                  |  |
|----|--------------------------|-------------|-------------|---|----|---|------------------------------------------------------------------------------------------------------------------------------------------------------------------------------------------------------------------------------------------------------------------------------------------------------------------------------------------------------------------------------------------------------------------------------------------------------------------------------------------|-------------------------------------------------------------|-----------------|---------------------------------------------------------------------------------------|-------|----------------------------------------------------------------------------------------------------|-----|---|-------------------------------------------------------------------------------------------------------------------------|----------------|----------------------------------------------------------------------------------------------------------------------------------------------------------------------------------------------------------------------------------|--|
|    |                          |             |             |   |    |   | hyponatraemia, the patient was airlifted to a local hospital                                                                                                                                                                                                                                                                                                                                                                                                                             |                                                             |                 |                                                                                       |       |                                                                                                    |     |   |                                                                                                                         |                |                                                                                                                                                                                                                                  |  |
| 57 | Ledocho wski et al. 1986 | Austria     | Case report | 1 | 47 | F | Patient had a history of schizophrenia and was found drinking water and vomiting by the sink in her room. She was admitted to the psychiatric clinic where psychiatrists suspected poisoning and transferred the patient to internal medicine                                                                                                                                                                                                                                            | Unspecified                                                 | Acute           | Confusion, incoherent speech, seizures, coma                                          | Water | "Drank a large amount"                                                                             | 101 | - | Hypertonic saline, frusemide, potassium replacement, doxycycline, dexamethason, phenytoin, cimetidine, haemo-filtration | -              | Recovery - patient had 3 L of clear fluid removed through haemo-filtration and also excreted 5200 mL of urine over 24 hrs. Her serum Na normalised after 17 hrs and she was transferred back to psychiatry after 36 hrs          |  |
| 58 | Itoh et al. 1997         | Japan       | Case report | 1 | 33 | M | Patient had a history of schizophrenia and had suffered intermittently from vomiting, abdominal distension and altered levels of consciousness                                                                                                                                                                                                                                                                                                                                           | Unspecified                                                 | Chronic         | Vomiting, abdominal distension, altered levels of consciousness, urinary incontinence | Water | "Continuous water drinking"                                                                        | 130 | - | Fluid restriction, urethral catheter, vesicostomy                                                                       | -              | Ongoing - fluid restriction was ineffective, so a surgical intervention was decided upon to prevent renal failure. After surgery, symptoms reduced but the patient's polydipsia persisted                                        |  |
| 59 | Salathe et al. 2018      | Switzerland | Case report | 1 | 19 | F | Patient was admitted to emergency with altered levels of consciousness. Her friends reported that they had previously been at a party where the patient drank a glass of vodka, complained about feeling unwell, threw up and then loss consciousness. A urinalysis showed evidence of MDMA ingestion                                                                                                                                                                                    | MDMA                                                        | Acute - 4.5 hrs | Vomiting, loss of consciousness                                                       | Water | "Very thirsty and drinking lots of water"                                                          | 122 | - | Hypertonic (3%) saline, normal saline                                                                                   | -              | Recovery - patient was discharged the following day and suffered no further complications                                                                                                                                        |  |
| 60 | Putterman et al. 1993    | Israel      | Case report | 1 | 19 | M | A previously healthy patient was admitted to hospital with agitation and confusion. He had a previously low level of physical activity, however on the day of admission, had engaged in many hrs of strenuous hiking in hot weather. During the hike, he also consumed excessive amounts of water                                                                                                                                                                                        | Unspecified                                                 | Acute - 2 hrs   | Nausea, emesis, convulsion                                                            | Water | "Several litres of tap water" during the hike and more after as a medic believed he was dehydrated | 115 | - | IV isotonic fluids, fluid restriction                                                                                   | Rhabdomyolysis | Recovery - isotonic fluids were discontinued and replaced with fluid restriction only. Patient excreted large amounts of urine and his serum Na had normalised within 36 hrs. His symptoms gradually improved with no recurrence |  |
| 61 | Christenson et al. 1985  | USA         | Case report | 1 | 79 | F | Patient presented to hospital with vaginal bleeding and was scheduled for a pelvic ultrasound examination and dilation and curettage surgery. She mixed up her gynaecologists instructions for the surgery with the ultrasound and remained nil by mouth for 12 hrs. In order to complete the ultrasound, technicians had her drink a 1500-2000 mL load of water                                                                                                                         | Unspecified                                                 | Acute           | Dizziness, decreasing level of consciousness, disoriented                             | Water | 1.5-2 L over the morning                                                                           | 122 | - | 300 mL saline infusion (3%), glucose in normal saline (5%)                                                              | -              | Recovery - after treatment, the patient's symptoms improved and her serum Na normalised (141 mmol/L) the following day                                                                                                           |  |
| 62 | Onozaki et al. 2001      | Japan       | Case report | 1 | 42 | M | Patient had a history of nephrogenic DI with a high level of plasma arginine vasopressin. He had experienced chronic polydipsia and polyuria since 2 months of age. After his first hospital admission he was placed on trichlormethiazide and triamterene which were successful in reducing his water intake (7-8 L/day); he remained stable for 6 months. However, his water intake began increasing again and he was eventually re-admitted with general fatigue and 4 kg weight gain | Trichlormethiazide (4 mg daily), triamterene (200 mg daily) | Chronic         | Fatigue, weight gain                                                                  | Water | 20-27 L/day                                                                                        | 124 | - | Water restriction to 10 L/day and discontinuation of diuretics                                                          | -              | Recovery - patient's serum Na normalised within 8 days of water restriction and discontinuation of diuretics. Patient excreted 13 L of urine/day                                                                                 |  |
| 63 | Mavragani et al. 2005    | Greece      | Case report | 1 | 28 | F | Patient was a nun with a history of antiphospholipid syndrome and systemic lupus erythematosus and had experienced persistent                                                                                                                                                                                                                                                                                                                                                            | Acenocoumarol, oxcarbazepine (300-450 mg)                   | Chronic         | Partial seizures, loss of consciousness, sialorrhea, mastication muscle contraction   | Water | 6 L/day                                                                                            | 124 | - | Overnight fluid restriction, diphenhydantoin (300 mg/day)                                                               | -              | Recovery - oxcarbazepine was discontinued and replaced by diphenhydantoin. Within 2 weeks, polydipsia had resolved and serum Na had normalised                                                                                   |  |

|    |                             |        |               |   |    |   |                                                                                                                                                                                                                                                                                                                                                                                                                                                                                                                                                                                                             |                                  |                  |                                                                                                                                                                |       |                                              |     |   |                                                                                                                                                                                    |   |                                                                                                                                                                                                                                                                                                                                                                                                                                        |
|----|-----------------------------|--------|---------------|---|----|---|-------------------------------------------------------------------------------------------------------------------------------------------------------------------------------------------------------------------------------------------------------------------------------------------------------------------------------------------------------------------------------------------------------------------------------------------------------------------------------------------------------------------------------------------------------------------------------------------------------------|----------------------------------|------------------|----------------------------------------------------------------------------------------------------------------------------------------------------------------|-------|----------------------------------------------|-----|---|------------------------------------------------------------------------------------------------------------------------------------------------------------------------------------|---|----------------------------------------------------------------------------------------------------------------------------------------------------------------------------------------------------------------------------------------------------------------------------------------------------------------------------------------------------------------------------------------------------------------------------------------|
|    |                             |        |               |   |    |   | polydipsia and hyponatraemia throughout the years                                                                                                                                                                                                                                                                                                                                                                                                                                                                                                                                                           |                                  |                  |                                                                                                                                                                |       |                                              |     |   |                                                                                                                                                                                    |   |                                                                                                                                                                                                                                                                                                                                                                                                                                        |
| 64 | Gutmann et al. 2002         | USA    | Case report   | 1 | 20 | F | A previously healthy army trainee presented with an upper respiratory and flu-like illness 3 days before her unit was required to complete a drug test. In order to provide a urine sample she consumed up to 10-12 L of water in 2-3 hrs while being supervised and also performed vigorous exercises (push-ups, flutter kicks, running in place)                                                                                                                                                                                                                                                          | Unspecified                      | Chronic - 3 days | Dizziness, headaches, jerky upper extremity movements, confusion, pulmonary oedema, intracranial swelling                                                      | Water | 10-12 L in 2-3 hrs                           | 123 | - | Continuous IV infusion of dopamine and then dobutamine, furosemide (40 mg), 0.7 L normal saline                                                                                    | - | Death - although the patient excreted copious amounts of urine and her serum Na normalised to 144 mmol/L, her mental status didn't improve and she was diagnosed as brain dead 2 days after admission. An autopsy revealed diffuse bilateral intra-alveolar oedema and congestion as well as acute bronchopneumonia and mild brain swelling. The heart and brain weighed 285 g and 1350 g respectively                                 |
| 65 | Lai et al. 2016             | China  | Case report   | 1 | 60 | F | Patient was admitted to hospital following a "skin infestation". She reported feeling insects crawling and breeding under her skin since travelling to a rural area 4 months prior. She also believed that her living room was filled with these insects and that they bit her, caused her great pain and that numerous insect eggs washed off when she showered. She had a past medical history of hypertension and had undergone an appendectomy. When a colonoscopy was scheduled, she ingested excessive amounts of water. She was eventually diagnosed with delusional infestation (DI) and depression | Amlodipine (5 mg daily)          | Acute            | Shortness of breath, irritation, itchy, vomiting, seizure, loss of consciousness, fever, mild coma, frothing of the mouth, biting tongue, urinary incontinence | Water | 12 L (5 thermos jugs) in a few hrs           | 120 | - | IV diazepam (10 mg), IV sodium valproate pumping, IV potassium and sodium supplement, risperidone (2.5 mg/night), aripiprazole (5 mg/night), bromocriptine, citalopram (40 mg/day) | - | Recovery - patient regained consciousness and her serum Na normalised. After her diagnosis of DI and treatment with atypical antipsychotics, her delusions and hallucinations alleviated and she was discharged. During a follow-up, she showed signs of depression which did not improve after 2 weeks of treatment. 1 month later she was reported to have attempted suicide, and was lost to follow-up despite repeated phone calls |
| 66 | Santos-Soares et al. 2008   | Brazil | Case report   | 1 | 34 | M | A previously healthy patient was admitted to hospital after suffering a seizure. He was playing domino and the punishment for losing was to drink a full glass of water. It was estimated that the patient ended up drinking around 40 glasses of water over a few hrs                                                                                                                                                                                                                                                                                                                                      | Unspecified                      | Acute            | Sleepy, seizures                                                                                                                                               | Water | 8 L (40 glasses) over a few hrs              | 123 | - | Saline infusion (3%)                                                                                                                                                               | - | Recovery - patient made a full recovery and was discharged from hospital after 5 days                                                                                                                                                                                                                                                                                                                                                  |
| 67 | Yalcin-Cakmakli et al. 2010 | Turkey | Case report 1 | 1 | 33 | F | Patient presented to emergency unconscious. She had a history of depression and had been taking medication for vaginal discharge. Earlier in the day she had undergone a pelvic ultrasound and consumed roughly 5-6 L of water                                                                                                                                                                                                                                                                                                                                                                              | Escitalopram (10 mg), ornidazole | Acute - 4 hrs    | Nausea, vomiting, numbness of right arm/leg/upper lip, uncooperative, sleepy, anxious, tonic-clonic seizure, agitated, confused                                | Water | 5-6 L                                        | 122 | - | Strict water restriction, oral salt supplementation                                                                                                                                | - | Recovery - patient's serum Na normalised after 18 hrs (137 mmol/L) and her symptoms completely resolved                                                                                                                                                                                                                                                                                                                                |
| 68 | Yalcin-Cakmakli et al. 2010 | Turkey | Case report 2 | 1 | 19 | F | A previously healthy patient was admitted after developing symptoms related to hyponatraemia following a pelvic ultrasound for her menstruation irregularities. She consumed around 3 L of water in 1.5 hrs before the scan                                                                                                                                                                                                                                                                                                                                                                                 | Unspecified                      | Acute - 2 hrs    | Headache, nausea, vomiting, lassitude, progressive confusion, lethargic, central facial paresis and hemiparesis on right                                       | Water | 3 L in 1.5 hrs                               | 126 | - | Unspecified                                                                                                                                                                        | - | Recovery - patient's serum Na normalised in 16 hrs (136 mmol/L) and she was discharged after 48 hrs of observation                                                                                                                                                                                                                                                                                                                     |
| 69 | Kowalski et al. 2014        | USA    | Case report 1 | 1 | 23 | M | Patient had a history of childhood-onset schizophrenia and believed that he was a persecuted Christian who could be "fed to the lions in the coliseum" at any moment. He developed polydipsia in his mid-late teens                                                                                                                                                                                                                                                                                                                                                                                         | Unspecified                      | Unspecified      | Delusions                                                                                                                                                      | Water | "Finding sources of water and overconsuming" | 117 | - | Gatorade protocol behaviour modification program (given sports drinks)                                                                                                             | - | Ongoing - patient's serum Na improved to 120's and his delusions decreased                                                                                                                                                                                                                                                                                                                                                             |
| 70 | Kowalski et al. 2014        | USA    | Case report 2 | 1 | 63 | M | Patient was a veteran with a history of congestive heart failure. He was admitted to hospital after his spouse found him "wandering their                                                                                                                                                                                                                                                                                                                                                                                                                                                                   | Unspecified                      | Unspecified      | Disoriented, pulmonary oedema                                                                                                                                  | Water | "Regimen of drinking more water"             | 118 | - | Normal saline, IV fluids                                                                                                                                                           | - | Recovery - patient improved within 3 days, his cardiac medication was adjusted and he was told to "not over drink" water before discharge                                                                                                                                                                                                                                                                                              |

|    |                    |           |                            |    |    |             |                                                                                                                                                                                                                                                                                                                                                                                                                                                                                                                                                    |                                                                                                                                                |               |                                                                                                                                                   |       |                                |                                |   |                                                                                   |   |                                                                                                                                                                                                      |
|----|--------------------|-----------|----------------------------|----|----|-------------|----------------------------------------------------------------------------------------------------------------------------------------------------------------------------------------------------------------------------------------------------------------------------------------------------------------------------------------------------------------------------------------------------------------------------------------------------------------------------------------------------------------------------------------------------|------------------------------------------------------------------------------------------------------------------------------------------------|---------------|---------------------------------------------------------------------------------------------------------------------------------------------------|-------|--------------------------------|--------------------------------|---|-----------------------------------------------------------------------------------|---|------------------------------------------------------------------------------------------------------------------------------------------------------------------------------------------------------|
|    |                    |           |                            |    |    |             | neighbourhood". The patient reported increasing his water intake because he had been told it was healthy and believed it would help him lose weight                                                                                                                                                                                                                                                                                                                                                                                                |                                                                                                                                                |               |                                                                                                                                                   |       |                                |                                |   |                                                                                   |   |                                                                                                                                                                                                      |
| 71 | Vieweg et al. 1985 | USA       | Case report 1              | 1  | 46 | M           | Patient was institutionalised with a history of schizophrenia and self-induced water intoxication. He developed hypospthenuria at age 39 as well as hypotonic bowel and bladder at age 46                                                                                                                                                                                                                                                                                                                                                          | Antipsychotic agents                                                                                                                           | Unspecified   | Major motor seizure, hyposthenuria, hypotonic bowel and bladder                                                                                   | Water | Unspecified                    | 115                            | - | Unspecified                                                                       | - | Unspecified                                                                                                                                                                                          |
| 72 | Vieweg et al. 1985 | USA       | Case report 2              | 1  | 45 | M           | Patient was institutionalised with a history of schizophrenia and self-induced water intoxication. He developed severe hyposthenuria at age 36                                                                                                                                                                                                                                                                                                                                                                                                     | Antipsychotic agents                                                                                                                           | Unspecified   | Major motor seizure, hyposthenuria                                                                                                                | Water | Unspecified                    | 108                            | - | Unspecified                                                                       | - | Unspecified                                                                                                                                                                                          |
| 73 | Yong et al. 2015   | Australia | Case reports               | 10 | 84 | 3 M, 7 F    | Patients were admitted to hospital during the 2014 Australian heatwave. During this period, public health warnings advised people to "drink plenty of water", and 7 of the 10 patients cited this as being the reason for their excessive intake of water. 6 patients were on medical therapy, 4 patients had a history of excessive water intake, 3 patients were on thiazide diuretics, 1 patient was on loop diuretics and various comorbidities of the patients included cardiac failure, hypertension, cognitive impairment and alcohol abuse | Thiazide diuretics, loop diuretics, spironolactone, angiotensin-converting enzyme inhibitor or angiotensin II receptor blocker, antipsychotics | Unspecified   | Seizures (4), vomiting (4), coma (2), confusion (3), cardiorespiratory distress (2), pulmonary oedema, atrial fibrillation, myocardial infarction | Water | One patient consumed 6 L/day   | One patient's serum Na was 106 | - | Fluid restriction, (7) hypertonic saline (3), normal saline (9), salt tablets (1) | - | Unspecified                                                                                                                                                                                          |
| 74 | Gillum et al. 1984 | USA       | Case report                | 1  | 37 | F           | Patient had chronic schizophrenia and had begun lithium carbonate therapy 3 months before presenting to hospital. Her relatives reported her drinking copious amounts of tap water before collapsing                                                                                                                                                                                                                                                                                                                                               | Lithium carbonate                                                                                                                              | Acute         | Semi-comatose                                                                                                                                     | Water | "Copious amounts of tap water" | 118                            | - | Urinary catheter                                                                  | - | Recovery - patient excreted 2 L of dilute urine upon insertion of urinary catheter and then more for 8 hrs until her serum Na normalised (138 mmol/L). She regained consciousness after around 6 hrs |
| 75 | Cheng et al. 1990  | USA       | Retrospective cohort study | 13 | 49 | Unspecified | Medical records from all patients with polydipsia in a hospital between 1977-1989 were reviewed to identify those who had experienced hyponatraemia. 11 patients had a background of schizophrenia and 2 had alcohol dementia. Other comorbidities included hypertension, benign prostate hypertrophy and chronic obstructive pulmonary disease                                                                                                                                                                                                    | Phenothiazines, haloperidol, thiothixene, thiazide diuretics (4)                                                                               | Unspecified   | Seizures, coma, confusion, vomiting, lethargy, weakness, agitation, staggering gait                                                               | Water | > 400 mL/hr                    | 110                            | - | Hypertonic saline infusion, fluid restriction                                     | - | Recovery - all patients recovered from hyponatraemia immediately after treatment and there was no evidence of adverse neurologic sequelae up to 6 years follow-up                                    |
| 76 | Issa et al. 1997   | USA       | Case report                | 1  | 72 | M           | A previously healthy patient developed obstructive voiding symptoms 6 months after radical retropubic prostatectomy for prostate cancer. Past medical history included partial gastrectomy with Billroth-I diversion for treatment of peptic ulcer disease. In preparation for a uroflowmetry test, the patient consumed excessive amounts of water                                                                                                                                                                                                | Unspecified                                                                                                                                    | Acute - 4 hrs | Anxiety, generalised weakness, confusion, transient clonic seizure                                                                                | Water | > 6 L/3 hrs                    | 118                            | - | Fluid restriction, diuretics, slow IV infusion of 3% hypertonic saline            | - | Recovery - the patient's serum Na normalised within 48 hrs (135 mmol/L), his symptoms resolved and he was discharged home                                                                            |
| 77 | Mirvis et al. 2015 | UK        | Case report 1              | 1  | 87 | F           | Patient had a history of polymyalgia rheumatic and multiple myeloma. When attending hospital treatment she stated that she was "struggling to drink 3 L a day", something a nurse had previously advised her                                                                                                                                                                                                                                                                                                                                       | Cyclophosphamide, prednisolone, thalidomide, bortezomib                                                                                        | Chronic       | Confused, disorientated, pneumonia                                                                                                                | Water | 3 L/day                        | 112                            | - | Fluid restriction, fludrocortisone, antibiotics                                   | - | Recovery - patient's serum Na normalised within 5 days (138 mmol/L)                                                                                                                                  |

|    |                        |         |               |   |    |   |                                                                                                                                                                                                                                                                                                                                                                 |                                                                                                            |               |                                                                                                                           |           |                                      |     |     |                                                                                                      |                |                                                                                                                                                                                                                                                                                                                                                                                |  |
|----|------------------------|---------|---------------|---|----|---|-----------------------------------------------------------------------------------------------------------------------------------------------------------------------------------------------------------------------------------------------------------------------------------------------------------------------------------------------------------------|------------------------------------------------------------------------------------------------------------|---------------|---------------------------------------------------------------------------------------------------------------------------|-----------|--------------------------------------|-----|-----|------------------------------------------------------------------------------------------------------|----------------|--------------------------------------------------------------------------------------------------------------------------------------------------------------------------------------------------------------------------------------------------------------------------------------------------------------------------------------------------------------------------------|--|
|    |                        |         |               |   |    |   | to do. She later experienced a fall at home and was admitted to hospital with hyponatraemia                                                                                                                                                                                                                                                                     |                                                                                                            |               |                                                                                                                           |           |                                      |     |     |                                                                                                      |                |                                                                                                                                                                                                                                                                                                                                                                                |  |
| 78 | Mirvis et al. 2015     | UK      | Case report 2 | 1 | 77 | F | Patient had an 11-year history of multiple myeloma and had been receiving chemotherapy treatments. 3 years after her diagnosis, a routine biochemistry test revealed persistent intermittent hyponatraemia. The patient reported that she had been advised to drink 3 L of water per day by a nurse specialist                                                  | Chemotherapy regimens (melphalan, prednisolone), bortezomib, dexamethasone, cyclophosphamide, lenalidomide | Chronic       | Unspecified                                                                                                               | Water     | 4 L/day                              | 126 | -   | Fluid restriction (1-1.5 L/day)                                                                      | -              | Recovery - patient's serum Na normalised (136 mmol/L)                                                                                                                                                                                                                                                                                                                          |  |
| 79 | Strachan et al. 2007   | USA     | Case report   | 1 | 63 | M | Patient had a history of bipolar disorder and chronic obstructive pulmonary disease. He had previously been hospitalised for a hyponatraemic episode (116 mmol/L) and had developed changes in mental status as well as respiratory failure but improved after treatment                                                                                        | Tiotropium inhaler, fluticasone/salmeterol inhaler, risperidone, lithium carbonate                         | Unspecified   | Shortness of breath, lethargic, pulmonary oedema, hypercapnic respiratory failure                                         | Water     | 10-12 L/day                          | 110 | -   | 3% saline infusion, bicarbonate infusion, intubation                                                 | Rhabdomyolysis | Recovery - patient's serum Na normalised and he was weaned off mechanical ventilation                                                                                                                                                                                                                                                                                          |  |
| 80 | Noonan et al. 1977     | Canada  | Case report   | 1 | 32 | F | Patient had a history of mental retardation and wandering behaviour. Her excessive water drinking behaviours were well concealed but careful observation revealed that she would lie in the bath with her mouth to the faucet so that the sound of running water couldn't be heard. She also had a background of gallstones                                     | Unspecified                                                                                                | Unspecified   | Nausea, vomiting, agitation, auditory and visual hallucinations, compulsive hand washing, altered levels of consciousness | Water     | "Continued excessive water drinking" | 127 | -   | Phenothiazines, butyrophenones, thioxanthenes, behaviour therapy (only bathing in presence of staff) | -              | Ongoing - patient's compulsive water drinking has been resistant to change and episodes of hyponatraemia continue to occur periodically                                                                                                                                                                                                                                        |  |
| 81 | Hayashi et al. 2005    | Japan   | Case report   | 1 | 69 | M | Patient was diagnosed with schizophrenia and hospitalised for 30-years. 2 hrs before he was found dead in his room, he had been observed eating lunch in the dining room. Nurses frequently noted him drinking water excessively                                                                                                                                | Unspecified                                                                                                | Unspecified   | Unspecified                                                                                                               | Water     | "Drink running water excessively"    | 92  | -   | -                                                                                                    | -              | Death - patient was found dead in his room. Autopsy revealed congested organs and diluted intracardiac blood. His heart weighed 320 g and left and right lungs were oedematous, weighing 660 and 780 g respectively. The stomach was enlarged and contained 1400 mL of clear brownish fluid. A large amount of fluid was also found in the duodenum and small intestine        |  |
| 82 | Vanhaebost et al. 2018 | Belgium | Case report   | 1 | 54 | M | Patient was an inmate at the psychiatric unit of a prison. He had a history of tobacco addiction, diabetes and schizophrenia. Two inmates had alerted security that he was "vomiting a transparent fluid" but despite rapid medical attention and resuscitation, he didn't survive. He had previously been seen compulsively drinking water                     | Insulin, paliperidone, aripiprazole, ventafaxine                                                           | Acute - 3 hrs | Vomiting, convulsions                                                                                                     | Water     | 5 L over 3 hrs                       | -   | 117 | Resuscitation                                                                                        | -              | Death - patient was seen vomiting and convulsing by fellow inmates, but despite rapid medical attention he did not survive. Autopsy revealed a whitish, foamy liquid in the upper and lower respiratory airways, oedematous left and right lungs weighing 800 g and 1150 g respectively, heart weighing 420 g, brain weighing 1430 g and 200 mL of watery fluid in the stomach |  |
| 83 | Cronin 1987            | USA     | Case report 1 | 1 | 60 | M | Patient was a retired mechanic with a history of symptomatic hyponatraemia and intractable hiccups. His medical history included hypertension, glaucoma, latent lues, upper GI bleeding, colonic diverticuli and alcohol abuse. Patient reported drinking excessive water to relieve his hiccups, but his wife also reported self-induced vomiting with a spoon | Unspecified                                                                                                | Unspecified   | Hiccups, weakness, nausea, vomiting, confusion                                                                            | Water     | 10-12 gallons/day                    | 113 | -   | IV saline, water restriction, hypnosis, psychoactive drugs (thorazine and diazepam)                  | -              | Ongoing - patient's serum Na normalised within a few days. However, he was still noted to be drinking excessive amounts of water on occasion and inducing vomiting. Despite treatment his drinking behaviour didn't change and he refused long-term psychiatric treatment                                                                                                      |  |
| 84 | Cronin 1987            | USA     | Case report 2 | 1 | 56 | M | Patient was a former construction worker with a 30-                                                                                                                                                                                                                                                                                                             | Thorazine therapy                                                                                          | Unspecified   | Hiccups, vomiting, seizures, agitation, semi-comatose                                                                     | Water and | "Drinking large quantities of        | 103 | -   | Isotonic saline infusion, water                                                                      | -              | Recovery - despite thorazine therapy being ineffective for treating the                                                                                                                                                                                                                                                                                                        |  |

|    |                     |    |               |   |    |   |                                                                                                                                                                                                                                                                                                                                                                                                                                                         |                                                                                 |             |                                                                                |                              |                                                             |     |   |                                                                                  |                                              |                                                                                                                                                                                                                                                                                                                                                                                                                                                                                                              |
|----|---------------------|----|---------------|---|----|---|---------------------------------------------------------------------------------------------------------------------------------------------------------------------------------------------------------------------------------------------------------------------------------------------------------------------------------------------------------------------------------------------------------------------------------------------------------|---------------------------------------------------------------------------------|-------------|--------------------------------------------------------------------------------|------------------------------|-------------------------------------------------------------|-----|---|----------------------------------------------------------------------------------|----------------------------------------------|--------------------------------------------------------------------------------------------------------------------------------------------------------------------------------------------------------------------------------------------------------------------------------------------------------------------------------------------------------------------------------------------------------------------------------------------------------------------------------------------------------------|
|    |                     |    |               |   |    |   | year history of hiccups. He reported inducing vomiting and drinking excessive amounts of water to relieve the hiccups. His medical background included alcohol abuse, probable alcoholic cerebellar degeneration, a partial gastrectomy for peptic ulcer disease, lumbar disc surgery and a right cerebrovascular accident with mild residual left hemiparesis                                                                                          |                                                                                 |             |                                                                                | alcohol                      | water", 1 pint of gin/day for 15 yrs                        |     |   | restriction, hypertonic saline, frusemide diuresis                               |                                              | patient's hiccups, water restriction was effective in restoring serum Na                                                                                                                                                                                                                                                                                                                                                                                                                                     |
| 85 | Bremner et al. 1991 | UK | Case report 1 | 1 | 58 | F | Patient had a 20-year history of schizophrenia as well as a moderate mental handicap. She was noted to be drinking excessively and had various episodes of water intoxication over the past 12 years, possibly related to her hallucinations. Nurses noted that during periods of excessive water consumption, she talked to an imaginary person and looked upwards for no reason. Medical background included diabetes which was managed by diet alone | Haloperidol                                                                     | Unspecified | Vomiting, fits, stupor                                                         | Water                        | "Excessive water drinking"                                  | 116 | - | Phenytoin, increased dose of haloperidol                                         | -                                            | Recovery - patient was prescribed phenytoin following an episode of atypical epilepsy. Her excessive consumption of water and subsequent hyponatraemia were managed well with an increased dose of haloperidol                                                                                                                                                                                                                                                                                               |
| 86 | Bremner et al. 1991 | UK | Case report 2 | 1 | 53 | M | Patient had brain damage resulting from meningitis in infancy as well as a family history of affective disorder. He had various episodes of sleeplessness, weight loss and suicidal thoughts, and episodes of hoarding rubbish and wandering off to sleep outdoors. He had a history of compulsive smoking, self-inflicted skin injuries and excessive consumption of tea                                                                               | Thiazide diuretics                                                              | Unspecified | Confusion                                                                      | Water and tea                | "Drinking excessively"                                      | 125 | - | Chlorpromazine (300-400 mg/day), haloperidol (5 mg/day), demeclocycline (300 mg) | -                                            | Recovery - patient's serum Na normalised after prescription of demeclocycline and he had no further episodes of hyponatraemia                                                                                                                                                                                                                                                                                                                                                                                |
| 87 | Bremner et al. 1991 | UK | Case report 3 | 1 | 51 | F | Patient was deserted in early childhood by an unstable mother and had a family history of psychiatric illnesses. Her brother had repeated admissions for unspecified psychosis. She was diagnosed with personality disorder and described as the "ward bully". She had periods of self-harm and depressive episodes                                                                                                                                     | Depot flupenthixol decanoate, lofepramine                                       | Unspecified | Confusion, vomiting, swollen face, distended abdomen, rigidity, coma           | Water                        | "Always at the tap"                                         | 118 | - | Fluid restriction, daily weighing, depot flupenthixol, lithium                   | -                                            | Recovery - patient's previous medications were suspended and she had 4 further episodes of hyponatraemia over the next 10 months. After fluid restriction, her serum Na values normalised but she became depressed and suicidal and would drink large amounts of water from the toilet. When flupenthixol was re-introduced, her water consumption reduced dramatically and she had no further episodes of hyponatraemia                                                                                     |
| 88 | Bremner et al. 1991 | UK | Case report 4 | 1 | 29 | M | Patient was diagnosed with disintegrative psychosis and childhood autism at 18-months. He developed the habits of touching women's breasts and self-mutilating his eyes, which resulted in cataracts and blindness in one eye. He had a history of hypertension and anxiety and had experienced various episodes of hyponatraemia throughout the years                                                                                                  | Nifedipine, fluvoxamine, chlorpromazine, atenolol, prazosin, thiazide diuretics | Unspecified | Abusive, tense, vomiting, diarrhoea, coma, respiratory arrest, cerebral oedema | Water                        | "Drinking excessively"                                      | 121 | - | Fluid restriction, resuscitation, IV sodium bicarbonate, normal saline (2 L)     | Hypernatraemia with flaccid tetraplegia, CPM | Death - patient's first 2 episodes of hyponatraemia were resolved with fluid restriction and discontinuation of thiazide diuretics. However, during patient's 3rd episode of hyponatraemia he had a respiratory arrest. He was resuscitated and treated with IV sodium bicarbonate and normal saline but became hypernatraemic with suspected CPM. He died 2 weeks later and an autopsy showed total infarction of the cerebral cortices, pons, medulla and cerebral hemispheres through to be due to anoxia |
| 89 | Bremner et al. 1991 | UK | Case report 5 | 1 | 41 | M | Patient had a history of epilepsy, aggressive outbursts, petty thievery and fire-setting under the influence of alcohol. He was institutionalised in a mental hospital, but when trialled for a                                                                                                                                                                                                                                                         | Carbamazepine                                                                   | Unspecified | Cerebrovascular episodes, unsteady gait, slurred speech                        | Water and coffee with powder | Drinks of coffee with powdered milk + water every 5 minutes | 126 | - | Discontinuation of carbamazepine, fluid restriction                              | -                                            | Unspecified                                                                                                                                                                                                                                                                                                                                                                                                                                                                                                  |

|    |                      |           |                            |    |    |                                                                                                                                                                                                                        |                                                                                                                                                                                                                  |             |                                                                                                                                   |          |                                        |     |   |                                                                                                                                        |   |                                                                                                                                                                                                                                                                                                                                                  |
|----|----------------------|-----------|----------------------------|----|----|------------------------------------------------------------------------------------------------------------------------------------------------------------------------------------------------------------------------|------------------------------------------------------------------------------------------------------------------------------------------------------------------------------------------------------------------|-------------|-----------------------------------------------------------------------------------------------------------------------------------|----------|----------------------------------------|-----|---|----------------------------------------------------------------------------------------------------------------------------------------|---|--------------------------------------------------------------------------------------------------------------------------------------------------------------------------------------------------------------------------------------------------------------------------------------------------------------------------------------------------|
|    |                      |           |                            |    |    | hostel rehabilitation program he would become temperamental, threaten arson, chain smoke and carry around jars of coffee and powdered milk to make drinks every 5 minutes. He also consumed excessive amounts of water |                                                                                                                                                                                                                  |             |                                                                                                                                   | red milk |                                        |     |   |                                                                                                                                        |   |                                                                                                                                                                                                                                                                                                                                                  |
| 90 | Grainger et al. 1992 | UK        | Case report                | 1  | 60 | F                                                                                                                                                                                                                      | Haloperidol                                                                                                                                                                                                      | Unspecified | Auditory and visual hallucinations, nausea, vomiting, headache, confusion, semi-consciousness, disorientation, grand mal seizures | Water    | 4 L in 12 hrs                          | 109 | - | Fluid restriction 500 mL, IV diazepam, hypertonic saline infusion (1 L), serum urea and electrolytes, urinary catheter, chlorpromazine | - | Recovery - patient's serum Na normalised over the next few days and she was discharged on day 18                                                                                                                                                                                                                                                 |
| 91 | Peh et al. 1990      | Singapore | Retrospective cohort study | 27 | 35 | 10 M, 17 F                                                                                                                                                                                                             | Chlorpromazine (17), thioridazine (3), haloperidol (10), trifluoperazine (1), fluphenazine decanoate (21), flupenthixol decanoate (1), amitriptyline (1), lithium carbonate (6), carbamazepine (5), diazepam (9) | Unspecified | Nausea, tremors, weight gain, disorientation, coma, fits                                                                          | Water    | 3 L/day                                | 120 | - | Fluid restriction                                                                                                                      | - | Unspecified                                                                                                                                                                                                                                                                                                                                      |
| 92 | Ismail et al. 2010   | Canada    | Letter/case report         | 1  | 62 | M                                                                                                                                                                                                                      | Depot risperidone (20 mg every 2 weeks), varenicline                                                                                                                                                             | Chronic     | Paranoia, delusions, disorganisation, nihilism, irritability                                                                      | Water    | "Significant increase in water intake" | 125 | - | Fluid restriction, normal saline bolus and infusion                                                                                    | - | Recovery - patient's varenicline was discontinued and fluid restriction trialed to no effect due to non-compliance. After administration of normal saline, his serum Na normalised and his mental status improved. He was discharged 3 days later and at a 5-week visit he remained stable despite having resumed smoking                        |
| 93 | Prim 1988            | USA       | Case report                | 1  | 47 | M                                                                                                                                                                                                                      | Haloperidol (5 mg)                                                                                                                                                                                               | Unspecified | Seizures, copious projectile emesis and uresis                                                                                    | Water    | > 20 cups/day                          | 123 | - | Structured activities, intensive nursing intervention, reduction in medication                                                         | - | Recovery - over 2 months, the patient's medication was reduced. Intensive nursing intervention with an increase in the number of structured activities was trialed with much success as the patient began to reduce his trips to the water fountain. After 5 months of this intervention, the patient had no more episodes of water intoxication |
| 94 | Lin et al. 2011      | Taiwan    | Case report                | 1  | 31 | F                                                                                                                                                                                                                      | Unspecified                                                                                                                                                                                                      | Unspecified | Seizures, loss of consciousness, vomiting                                                                                         | Water    | > 10 bottles/day (1500 mL/bottle)      | 112 | - | Lorazepam, phenytoin, intubation, 3% saline solution                                                                                   | - | Recovery - patient's serum Na normalised and she regained consciousness. She was discharged 5                                                                                                                                                                                                                                                    |



|     |                       |           |              |   |    |   |                                                                                                                                                                                                                                                                                                                                                                                                                                                                                                                                                   |                                                                                 |              |                                                                                    |       |                                          |     |   |                                                                                 |   |                                                                                                                                                                                                                                                                                     |
|-----|-----------------------|-----------|--------------|---|----|---|---------------------------------------------------------------------------------------------------------------------------------------------------------------------------------------------------------------------------------------------------------------------------------------------------------------------------------------------------------------------------------------------------------------------------------------------------------------------------------------------------------------------------------------------------|---------------------------------------------------------------------------------|--------------|------------------------------------------------------------------------------------|-------|------------------------------------------|-----|---|---------------------------------------------------------------------------------|---|-------------------------------------------------------------------------------------------------------------------------------------------------------------------------------------------------------------------------------------------------------------------------------------|
|     |                       |           |              |   |    |   | admission. Her medical history was unknown but detailed interviews with her family revealed that she consumed excessive amounts of water                                                                                                                                                                                                                                                                                                                                                                                                          |                                                                                 |              |                                                                                    |       |                                          |     |   |                                                                                 |   | days later and remained stable at a 2-week follow-up                                                                                                                                                                                                                                |
| 95  | Peh et al. 1990       | Singapore | Case report  | 1 | 40 | F | Patient had a history of schizophrenia and persecutory delusions against her family, as well as diabetes mellitus. She had various admissions for relapse. During her last admission, she reported having quarrelled with her husband due to paranoia about him and a woman neighbour                                                                                                                                                                                                                                                             | Fluphenazine decanoate, chlorpromazine, trifluoperazine, benzhexol, tolbutamide | Unspecified  | Confusion, fits, coma, restless, sweating, frothing at the mouth, pulmonary oedema | Water | "Drinking tap water excessively"         | 109 | - | IV dextrose-saline drip, fluid restriction,                                     | - | Death - during her last relapse, the patient threw a fit, fell and hit her head. She was managed for acute pulmonary edema but had a cardiac arrest and died. Autopsy revealed severely congested lungs, kidneys and liver, cerebral oedema and evidence of ischaemic heart disease |
| 96  | Finkel 2004           | USA       | Case report  | 1 | 45 | F | Patient was referred after the urine sample she submitted for drug testing showed a specific gravity of 1.001. She had no previous medical history. 4 months before the testing, she had started a diet that involved appetite suppressants and "fat-burning" pills, avoidance of salt and large quantities of water intake. Patient reported constantly carrying water around with her and waking 4-5 times per night to urinate                                                                                                                 | -                                                                               | Asymptomatic | Asymptomatic                                                                       | Water | 6-8 L/day                                | 124 | - | Unspecified                                                                     | - | Unspecified                                                                                                                                                                                                                                                                         |
| 97  | Finlayson et al. 1989 | Canada    | Case report  | 1 | 55 | F | Patient had a history of depression requiring hospitalisation. She presented for admission with agitation, insomnia, poor appetite and complaints of abdominal burning. During treatment she experienced a seizure and following recovery revealed that she drank excessive amounts of cold water to relieve her dry mouth and anxiety                                                                                                                                                                                                            | Chlorpromazine, thioridazine, diphenhydramine, ECT                              | Acute        | Agitation, vomiting, seizure                                                       | Water | 5-10 L/day                               | 106 | - | IV saline, fluid restriction, vasopressin, lithium, isocarboxazid, L-tryptophan | - | Recovery - patient's serum Na normalised and she was discharged after 5 weeks of treatment                                                                                                                                                                                          |
| 98  | Howe et al. 1983      | UK        | Case report  | 1 | 25 | M | A previously healthy patient developed a "flu-like" illness and suffered a seizure. He presented to hospital in a confused state but was treated and discharged in 1 week. Back at home his parents noticed that his memory had deteriorated and that he ate and drank excessively. After he was admitted to a neurological unit, he complained of hunger and thirst, stole food and water from other patients and drank his own bath water. During a water deprivation test, he escaped from the ward and was found 12 hrs later in another town | Unspecified                                                                     | Unspecified  | Poor memory, apathetic, seizures, hallucinations, disoriented, aggressive, violent | Water | "Drank from 2 L jugs and his bath water" | 125 | - | Phenytoin, haloperidol, hypertonic saline infusion                              | - | Ongoing - patient's hyperphagia and hyperdipsia continued but were slightly better managed. He was discharged to his parent's home but quickly re-admitted to a chronic-care hospital as they could not care for him. He remained hyponatraemic                                     |
| 99  | Koczapski et al. 1989 | Canada    | Cohort study | 8 | 42 | M | 8 patients with chronic schizophrenia and hyposthenuria were studied over 5 days to assess fluid intake and serum sodium level                                                                                                                                                                                                                                                                                                                                                                                                                    | Neuroleptics                                                                    | Unspecified  | Stupor, mild euphoria, seizures, drooling                                          | Fluid | 11 L/day                                 | 127 | - | Fluid restriction                                                               | - | Unspecified                                                                                                                                                                                                                                                                         |
| 100 | Kato et al. 2008      | Japan     | Case report  | 1 | 70 | F | Patient had anti-neutrophil cytoplasmic antibody-related glomerulonephritis and was admitted to hospital with vomiting, confusion and disorientation. After treatment and discharge, she presented to outpatient with low serum Na but no symptoms. She reported                                                                                                                                                                                                                                                                                  | Prednisolone, low-dose cyclophosphamide (CY)                                    | Unspecified  | Nausea, cerebral oedema                                                            | Fluid | > 2 L in 12 hrs                          | 108 | - | Fluid restriction (1 L/day)                                                     | - | Recovery - patient's CY was discontinued and she was fluid restricted. Following this, her serum Na normalised and no further episodes of hyponatraemia were observed                                                                                                               |

|     |                       |         |               |   |    |          |                                                                                                                                                                                                                                                                                                                                                                                                                       |                                                                                                       |                    |                                                                                                           |                        |                                                             |     |   |                                                                                                                                                                          |                                |                                                                                                                                                                                                                                                                                                 |
|-----|-----------------------|---------|---------------|---|----|----------|-----------------------------------------------------------------------------------------------------------------------------------------------------------------------------------------------------------------------------------------------------------------------------------------------------------------------------------------------------------------------------------------------------------------------|-------------------------------------------------------------------------------------------------------|--------------------|-----------------------------------------------------------------------------------------------------------|------------------------|-------------------------------------------------------------|-----|---|--------------------------------------------------------------------------------------------------------------------------------------------------------------------------|--------------------------------|-------------------------------------------------------------------------------------------------------------------------------------------------------------------------------------------------------------------------------------------------------------------------------------------------|
|     |                       |         |               |   |    |          | increased fluid intake to maintain urinary flow and prevent haemorrhagic cystitis. She also had a background of moderate renal failure and hypoalbuminaemia                                                                                                                                                                                                                                                           |                                                                                                       |                    |                                                                                                           |                        |                                                             |     |   |                                                                                                                                                                          |                                |                                                                                                                                                                                                                                                                                                 |
| 101 | Windpessl et al. 2017 | Austria | Case report   | 1 | 61 | F        | Patient was admitted for sudden onset confusion and slurred speech. She had commenced preparation for a colonoscopy by ingesting sodium picosulfate/magnesium citrate, water and tea within 2 hrs. Her husband found her confused with unintelligible speech. She had a history of hypothyroidism. Following treatment, she reported that she had eaten limited food for the past 2 days with minimal amounts of salt | Sodium picosulfate/magnesium citrate, levothyroxine, diclofenac (nonsteroidal anti-inflammatory drug) | Acute - 2 hrs      | Nausea, dizziness, vomiting, confusion, unintelligible speech, unsteady gait, tremor                      | Water, tea and PICOLAX | 2 L of water + 2 L of tea                                   | 122 | - | Hypertonic saline (3%)                                                                                                                                                   | -                              | Recovery - patient's symptoms resolved and her serum Na normalised. She remained well on follow-up 1 week later                                                                                                                                                                                 |
| 102 | Kushnir et al. 1990   | Israel  | Case report   | 1 | 31 | F        | Patient had a 9-year history of schizophrenia and depression. 1 month prior to admission she stopped taking her medications and began drinking excessive amounts of water. She was drinking straight from the garden hose on the day of her admission, and presented to hospital unconscious                                                                                                                          | Haloperidol (3 mg/day), artane (6 mg/day)                                                             | Acute              | Irritability, vomiting, diarrhoea, coma, shallow breathing, cerebral oedema                               | Water                  | "Drinking water frequently"                                 | 120 | - | Resuscitation                                                                                                                                                            | -                              | Death - patient died in asystole on the 5th day. Autopsy revealed cerebral oedema and normal kidneys                                                                                                                                                                                            |
| 103 | Korzets et al. 1996   | Israel  | Case report   | 1 | 28 | F        | Patient had a 8-year history of paranoid schizophrenia that worsened in the month leading to her admission. The patient's mother reported that before admission, the patient began to eat and drink excessively. She presented to ICU in a coma                                                                                                                                                                       | Fluphenazine (12.5 mg every 3 weeks), perphenazine (30 mg)                                            | Chronic - few days | Confused, dysphasic, coma                                                                                 | Water                  | "Drink excessively"                                         | 109 | - | Intubation, urethral catheter, hypertonic saline, IV furosemide therapy, IV KCl, IV magnesium sulfate                                                                    | Fever (39.3 C), rhabdomyolysis | Recovery - patient excreted 8 L of urine within the first 16 hrs. Her serum Na normalised and she was transferred to a psychiatric ward after 12 days                                                                                                                                           |
| 104 | Caputo et al. 2001    | Italy   | Case report   | 1 | 57 | M        | Patient had a history of chronic alcoholism (10-12 drinks/day) and presented with severe asthenia and semi-consciousness. He was a heavy smoker and had a medical background which included bronchitis, emphysema and arterial hypertension. His relatives reported a 10 day history of muscle pain, plus abstinence from food and excessive water intake                                                             | Theophylline, ace-inhibitors, diuretics, alprazolam, carvedilol                                       | Chronic - 10 days  | Vomiting, diarrhoea, muscle pain, asthenia, inability to maintain upright position, loss of consciousness | Water and alcohol      | 4-5 L of water/day + 10-12 alcoholic drinks/day (120-144 g) | 95  | - | Furosemide (20 mg/day), 1.5% saline solution, water restriction, nifedipine, alprazolam, theophylline, group B vitamins, folic acid, abstinence from alcohol, disulfiram | -                              | Recovery - patient regained consciousness and serum Na normalised. He was discharged with medication after 1 week. 1 month after discharge he had some trouble with balance but was otherwise fine (serum Na = 139 mmol/L). He began to take disulfiram and attend an alcohol addiction program |
| 105 | Inoue et al. 1985     | Japan   | Cohort study  | 6 | 38 | 4 M, 2 F | Patients were all psychiatric inpatients with the syndrome of self-induced water intoxication. 4 patients had schizophrenia, 1 had schizoaffective disorder and 1 had borderline personality disorder. 1 believed that water could wash out the poison in his body and 1 felt like someone was commanding her to drink                                                                                                | Psychotherapeutic medications                                                                         | Acute              | Tonic-clonic seizures, postictal coma, perspiration, nausea, vomiting, dyspnea, sleepiness                | Water                  | "Drank water excessively"                                   | 120 | - | IV infusion 2.5% sodium chloride                                                                                                                                         | -                              | Recovery - all patients recovered without neurological sequelae                                                                                                                                                                                                                                 |
| 106 | Beresford 1970        | USA     | Case report 1 | 1 | 34 | F        | Patient had a history of schizophrenia and was admitted with lethargy and convulsion. She had been in various psychiatric hospitals and her husband reported that she often drank 15-20 cups of coffee a day and gallons of water. Nurses noted that she stayed near the water fountain and drank large amounts                                                                                                       | Thioridazine hydrochloride, chlorpromazine hydrochloride, hydrochlorothiazide (25 mg/day)             | Acute - hrs        | Seizure, incoherent, somnolent, nauseous, distended bladder, lethargic                                    | Water and coffee       | 15-20 cups of coffee/day + gallons of water                 | 115 | - | 250 mL of IV saline (5%), fluid restriction                                                                                                                              | -                              | Recovery - the patient excreted 3.4 L of urine within the first 16 hrs. Her serum Na normalised within the first few days and she was transferred back to the psychiatric hospital on the 7th day                                                                                               |

|     |                       |        |                                  |   |    |          |                                                                                                                                                                                                                                                                                                                                                                                                                                                                                                                                                                                                                                                                                                                                                                                                                                                             |                                           |               |                                                                                            |       |                            |     |   |                                                                                                  |   |                                                                                                                                                                                                                                                                                                                                                        |
|-----|-----------------------|--------|----------------------------------|---|----|----------|-------------------------------------------------------------------------------------------------------------------------------------------------------------------------------------------------------------------------------------------------------------------------------------------------------------------------------------------------------------------------------------------------------------------------------------------------------------------------------------------------------------------------------------------------------------------------------------------------------------------------------------------------------------------------------------------------------------------------------------------------------------------------------------------------------------------------------------------------------------|-------------------------------------------|---------------|--------------------------------------------------------------------------------------------|-------|----------------------------|-----|---|--------------------------------------------------------------------------------------------------|---|--------------------------------------------------------------------------------------------------------------------------------------------------------------------------------------------------------------------------------------------------------------------------------------------------------------------------------------------------------|
| 107 | Beresford 1970        | USA    | Case report 2                    | 1 | 61 | M        | Patient had a history of depression, mild hypertension, atrial fibrillation, mild congestive heart failure and weakness in both legs due to a cervical spine injury. He presented to hospital multiple times complaining of fatigue, rapid heart rate, drowsiness etc. and reported that he drank lots of beer, coffee and water when he felt depressed. When nurses observed him drinking copious amounts of water, he stated it was because his "intestinal waters were reversed"                                                                                                                                                                                                                                                                                                                                                                         | Digoxin, methyldopa, hydrochloro thiazide | Unspecified   | Drowsiness, fatigue, confusion, disorientation                                             | Water | "Copious amounts of water" | 115 | - | Digoxin, low-sodium diet, hydrochlorothiazide, potassium chloride supplements, fluid restriction | - | Recovery - patient was prescribed a low-sodium diet to combat mild congestive heart failure, however his condition improved when salt was reintroduced. He passed 2.5 mL of urine on the 4th day and was alert by the 6th (serum Na had normalised to 138 mmol/L). Hydrochlorothiazide was discontinued and the patient was discharged on the 15th day |
| 108 | Goldman et al. 1988   | USA    | Case-control study               | 8 | 43 | 7 M, 1 F | Patients were recruited from the extended-treatment units of a psychiatric facility. All patients had a history of hyponatraemia. 7 patients had schizophrenia and 1 patient had organic delusional syndrome. A control group of patients without polydipsia, polyuria or hyponatraemia was also selected for comparison. Patients were asked to consume a standard oral water load over 15 minutes and blood and urine samples were collected every 30 minutes for 4 hrs. At the same time, patients were shown a form with different amounts of water and asked how much they wanted to drink. 2 hrs after this procedure, patients were given an infusion of hypertonic saline (3%). Ad libitum fluid intake was measured for 30 minutes after the completion of the infusion. Water intake was shown to be higher in test patients compared to controls | Chlorpromazine, other neuroleptics        | Acute - 4 hrs | -                                                                                          | Water | Unspecified                | 133 | - | Hypertonic saline                                                                                | - | Unspecified                                                                                                                                                                                                                                                                                                                                            |
| 109 | Gleadhill et al. 1982 | USA    | Retrospective case-control study | 8 | 50 | 1 M, 7 F | A computerised review of records from 1976-1979 was conducted to identify patients who were diagnosed with schizophrenia and had experienced episodes of hyponatraemia. 6 patients were smokers, all drank water excessively and all recovered without any lasting complications. A control group of schizophrenic patients who hadn't experienced hyponatraemia was also selected for comparison. 2 patients believed they were "washing away sins" and "purging their bodies". The others all reported thirst as the reason for their excessive intake                                                                                                                                                                                                                                                                                                    | Antipsychotic medication                  | Unspecified   | Obtunded (8), seizures (6), vomiting (6), alterations in sensorium and neurologic function | Water | "Drink water excessively"  | 115 | - | Unspecified                                                                                      | - | Recovery - all patients recovered and were discharged from hospital without any visible lasting complications                                                                                                                                                                                                                                          |
| 110 | Shapira et al. 1988   | Israel | Case report                      | 1 | 80 | F        | Patient was hospitalised in a confused state. She had no previous medical history except for some recent abdominal pains. When preparing for an abdominal ultrasound she was advised to drink plenty of water while fasting on a clear liquid diet. As she previously wasn't able to complete her ultrasound                                                                                                                                                                                                                                                                                                                                                                                                                                                                                                                                                | Unspecified                               | Acute         | Restless, confused, uncooperative                                                          | Water | 4 L overnight              | 119 | - | Hypertonic saline                                                                                | - | Recovery - patient improved within 24 hrs and serum Na normalised (138 mmol/L)                                                                                                                                                                                                                                                                         |

|     |                       |       |               |   |    |   |                                                                                                                                                                                                                                                                                                                                                                                                                                                                                                                                                                                                                     |                                           |               |                                                                                                                   |       |                             |     |     |                                                                                 |   |                                                                                                                                                                                           |
|-----|-----------------------|-------|---------------|---|----|---|---------------------------------------------------------------------------------------------------------------------------------------------------------------------------------------------------------------------------------------------------------------------------------------------------------------------------------------------------------------------------------------------------------------------------------------------------------------------------------------------------------------------------------------------------------------------------------------------------------------------|-------------------------------------------|---------------|-------------------------------------------------------------------------------------------------------------------|-------|-----------------------------|-----|-----|---------------------------------------------------------------------------------|---|-------------------------------------------------------------------------------------------------------------------------------------------------------------------------------------------|
|     |                       |       |               |   |    |   | due to inadequate preparation, she made sure to drink around 4 L of boiled water this time around                                                                                                                                                                                                                                                                                                                                                                                                                                                                                                                   |                                           |               |                                                                                                                   |       |                             |     |     |                                                                                 |   |                                                                                                                                                                                           |
| 111 | Basnyat et al. 2000   | Nepal | Case report   | 1 | 28 | F | Patient was trekking with her friend at low altitude in a hot, humid environment in Nepal when she developed a headache, confusion, delirium and seizures. They were attempting to complete a 2-day hike in 1 day. The patient believed that any dizziness experienced while working out could be overcome by drinking plenty of fluids, so continued to "pound water" over 6 hrs and only ate some saltless watery noodle soup. She was seen by a local shaman before her partner helped organise a helicopter rescue to Kathmandu. She had a history of asthma and childhood seizure secondary to a sports injury | Valproate (250 mg), pneumocort (200 mg)   | Acute         | Headache, fatigue, blurred vision, confusion, delirium, seizures, semi-comatose                                   | Water | 10 L/day                    | 122 | -   | Midazolam, phenytoin, 1500 mL Ringer's lactate, normal saline, cefotaxime (2 g) | - | Recovery - patient woke after 12 hrs and excreted around 2 L of urine while in hospital. She was later flown out of Kathmandu to Singapore where she fully recovered                      |
| 112 | Bhananker et al. 2004 | USA   | Case report   | 1 | 40 | F | A previously healthy patient presented to emergency with severe anxiety, diaphoresis, nausea and confusion. 12 hrs earlier she had undergone rhinoplasty and she had a history of generalised anxiety. During the evaluation, the patient often repeated herself and forget how to answer simple questions. The anesthesiologist was contacted and stated that the patient had consumed 4 L of water before surgery and 6 L after to prevent dehydration on advice from a naturopathic physician                                                                                                                    | Benzodiazepines, alprazolam               | Acute - 5 hrs | Anxiety, diaphoresis, nausea, confusion, tremors, fever                                                           | Water | 10 L over a few hrs         | 120 | -   | Fluid restriction, IV infusion 0.9% saline, Foley catheter                      | - | Recovery - patient's serum Na normalised over 10 hrs (140 mmol/L) and she excreted around 3.7 L of urine. She made a full recovery and was discharged without sequelae                    |
| 113 | Vieweg et al. 1984    | USA   | Case report 1 | 1 | 35 | M | Patient had a history of paranoid schizophrenia and had been hospitalised for 14 yrs. He developed hyposthenuria and polydipsia, and suffered from intermittent hyponatraemia throughout the years                                                                                                                                                                                                                                                                                                                                                                                                                  | Haloperidol                               | Chronic       | Auditory hallucinations, grandiose and persecutory delusions, disturbed thought content and progression, seizures | Water | 25 L/day                    | 115 | -   | Haloperidol, supplemental sodium chloride, fluid restriction                    | - | Ongoing - patient's serum Na improved to 132 mmol/L with supplemental sodium chloride. Antipsychotic therapy was continued. His schizophrenic symptoms persisted despite treatment        |
| 114 | Vieweg et al. 1984    | USA   | Case report 2 | 1 | 42 | F | Patient had a history of catatonic schizophrenia and had been hospitalised for 21 yrs. She suffered from hyposthenuria, hypotonic bowel and bladder, hydronephrosis and intermittent hyponatraemia and polydipsia                                                                                                                                                                                                                                                                                                                                                                                                   | Haloperidol                               | Chronic       | Agitation, mutism, blunted affect, hallucinations, delusions                                                      | Water | 13 L/day                    | 124 | -   | Haloperidol, fluid restriction, supplemental sodium chloride                    | - | Ongoing - patient's serum Na improved to 134 mmol/L with supplemental sodium chloride. Antipsychotic therapy was continued. Her schizophrenic symptoms persisted despite treatment        |
| 115 | Vieweg et al. 1984    | USA   | Case report 3 | 1 | 46 | M | Patient had disorganised schizophrenia and had been hospitalised for 30 yrs. He had hyposthenuria, hypotonic bowel and bladder and intermittent hyponatraemia and polydipsia                                                                                                                                                                                                                                                                                                                                                                                                                                        | Haloperidol, fluphenazine, chlorpromazine | Chronic       | Hallucinations, delusions                                                                                         | Water | 35 L/day                    | 115 | -   | Fluid restriction, fluphenazine, chlorpromazine, supplemental sodium chloride   | - | Ongoing - patient's serum Na improved to 134 mmol/L with supplemental sodium chloride. Antipsychotic therapy was continued. His schizophrenic symptoms persisted despite treatment        |
| 116 | Vieweg et al. 1984    | USA   | Case report 4 | 1 | 45 | M | Patient had undifferentiated schizophrenia and had been hospitalised for 20 yrs. He had hyposthenuria and intermittent hyponatraemia and polydipsia                                                                                                                                                                                                                                                                                                                                                                                                                                                                 | Haloperidol                               | Chronic       | Withdrawal, inattention, hallucinations, delusions                                                                | Water | 28 L/day                    | 108 | -   | Haloperidol, fluid restriction, supplemental sodium chloride                    | - | Ongoing - patient's serum Na improved to 133 mmol/L with supplemental sodium chloride. Antipsychotic therapy was continued. His schizophrenic symptoms persisted despite treatment        |
| 117 | DIMaio et al. 1980    | USA   | Case report   | 1 | 54 | F | Patient was found dead at home. She had been seen alive 2 hrs prior and her husband stated that she had been released from hospital the day before. Medical records from the hospital                                                                                                                                                                                                                                                                                                                                                                                                                               | Haloperidol, trihexyphenidyl              | Acute         | Passing out, possibly seizing, nervous, agitated, confused                                                        | Water | "Large quantities of water" | 110 | 115 | Hypertonic saline, water restriction                                            | - | Death - after the patient's 1st hospital admission, she recovered and was discharged (135 mmol/L) with a diagnosis of psychogenic polydipsia. An autopsy didn't find anything significant |

|     |                          |                      |               |   |    |   |                                                                                                                                                                                                                                                                                                                                                                                                                                                                                                                   |                                                                                                                                                                     |               |                                                                                                                              |                       |                                   |     |   |                                                                                                                                                                                                                                        |              |                                                                                                                                                                                                                                                                                        |
|-----|--------------------------|----------------------|---------------|---|----|---|-------------------------------------------------------------------------------------------------------------------------------------------------------------------------------------------------------------------------------------------------------------------------------------------------------------------------------------------------------------------------------------------------------------------------------------------------------------------------------------------------------------------|---------------------------------------------------------------------------------------------------------------------------------------------------------------------|---------------|------------------------------------------------------------------------------------------------------------------------------|-----------------------|-----------------------------------|-----|---|----------------------------------------------------------------------------------------------------------------------------------------------------------------------------------------------------------------------------------------|--------------|----------------------------------------------------------------------------------------------------------------------------------------------------------------------------------------------------------------------------------------------------------------------------------------|
|     |                          |                      |               |   |    |   | revealed that she had been admitted after passing out and that she had a long history of psychosis. Her husband stated that she ran out of her usual medications several days before admission and became increasingly nervous, drinking excessive amounts of water to combat this                                                                                                                                                                                                                                |                                                                                                                                                                     |               |                                                                                                                              |                       |                                   |     |   |                                                                                                                                                                                                                                        |              |                                                                                                                                                                                                                                                                                        |
| 118 | Lydakias et al. 2005     | Greece               | Case report   | 1 | 59 | M | Patient was a farmer working in an isolated village. He had a history of chronic mild thoracic pain and a CT scan revealed a small lesion at the lower lobe of the right lung. Patient presented to hospital once with epileptic status and was re-evaluated at a clinic 8 months later. When questioned, patient reported that he believed he had cancer and was going to die soon. He also reported high water consumption. Following psychiatric evaluation, the patient was diagnosed with psychotic disorder | Verapamil hydrochloride, NSAIDs                                                                                                                                     | Chronic       | Epilepsy, non-bizarre delusions                                                                                              | Water                 | 9-12 L/day                        | 110 | - | Hypertonic saline, fluid restriction (1.5 L/day) risperidone, benzodiazepines                                                                                                                                                          | -            | Death - patient was treated for past hyponatraemic episodes and discharged on psychiatric medications. However, he was non-compliant with medication and rarely attended his medical follow-ups. He committed suicide 1 yr later                                                       |
| 119 | Pupic-Bakrac et al. 2017 | Bosnia & Herzegovina | Case report   | 1 | 43 | M | Patient presented to emergency with convulsions. He had a history of psychosis and moderate mental retardation and was institutionalised in a facility for adults with special needs. He had a medical background of hypertension and tuberculosis                                                                                                                                                                                                                                                                | Antiepileptic therapy, carbamazepine, sodium valproate, haloperidol, promazine, diazepam, biperiden hydrochloride, lisinopril, amoxicillin, antituberculous therapy | Chronic       | Convulsions, vomiting, urinary incontinence, disorientated                                                                   | Water                 | "Drinking large amounts of water" | 98  | - | 500 mL of 0.9% NaCl solution, water restriction (2 L/day), hypertonic NaCl solution (7.5%), preoral salt intake, urinary catheter, amlodipine, metoprolol, sodium valproate, haloperidol, promazine, diazepam, biperiden hydrochloride | -            | Recovery - patient was discharged on the 9th day and medical staff at the facility were instructed to restrict water intake and regularly check serum electrolytes. His neuropsychiatric therapy was modified                                                                          |
| 120 | Mukherjee et al. 2005    | UK                   | Case report   | 1 | 52 | F | Patient was found unconscious at home. She was previously fit, worked as a property dealer and didn't have any physical or mental health issues. Following an argument with her partner, she was extremely stressed and upset and was observed to self-induce vomiting and drink excessive amounts of water                                                                                                                                                                                                       | -                                                                                                                                                                   | Acute         | Aphasic, loss of consciousness, rapid, high tone, slurred speech, expressive and receptive dysphagia, disoriented, excitable | Water                 | "Drink large quantities of water" | 108 | - | Benzyl penicillin, cefuroxime, potassium replacement, hypertonic saline, 1000 mL normal saline, venlafaxine, quetiapine                                                                                                                | Brain damage | Recovery - patient's serum Na normalised after 36 hrs and she regained consciousness. However, she was transferred to the psychiatry unit and diagnosed with organic behavioural and cognitive impairment. Her mental status improved over time but some cognitive impairment remained |
| 121 | Solomon et al. 2019      | Israel               | Case report 1 | 1 | 30 | F | A pregnant patient presented at 41 weeks in labour. She was confused and disoriented upon admission and had reportedly been drinking vast amounts of water to help cope with contractions                                                                                                                                                                                                                                                                                                                         | Unspecified                                                                                                                                                         | Acute         | Disoriented, confused, apathetic                                                                                             | Water                 | "Vast amounts"                    | 118 | - | Fluid restriction, normal saline (0.9% sodium chloride), cessation of epidural anaesthesia                                                                                                                                             | -            | Recovery - patient's neurological status improved after 2 hrs and she gave birth to an asymptomatic baby with serum Na of 122 mmol/L. Following delivery she was treated exclusively with water restriction and her serum Na normalised within 48 hrs                                  |
| 122 | Solomon et al. 2019      | Israel               | Case report 2 | 1 | 30 | F | A pregnant patient presented with ruptured membranes at 40 weeks. She gave birth to a baby with signs of lethargy and serum Na of 121 mmol/L. The patient reported excessive drinking during contractions                                                                                                                                                                                                                                                                                                         | -                                                                                                                                                                   | Acute         | Unspecified                                                                                                                  | Water                 | "Excessive drinking"              | 120 | - | Fluid restriction                                                                                                                                                                                                                      | -            | Recovery - patient's serum Na normalised after 12 hrs                                                                                                                                                                                                                                  |
| 123 | Vishwaje et al. 2005     | India                | Case report   | 1 | 77 | M | Patient presented to hospital with lower urinary tract symptoms. He was advised to undergo a uroflowmetry and drink plenty of fluids beforehand to ensure a full bladder. 2 hrs                                                                                                                                                                                                                                                                                                                                   | Unspecified                                                                                                                                                         | Acute - 2 hrs | Altered sensorium, weakness, seizure                                                                                         | Fluids (mainly water) | 6 L over 4 hrs                    | 119 | - | Fluid restriction, diuretics, IV hypertonic saline                                                                                                                                                                                     | -            | Recovery - patient's serum Na normalised after 24 hrs (138 mmol/L) and he was subsequently discharged                                                                                                                                                                                  |

|     |                      |              |                            |   |    |          |                                                                                                                                                                                                                                                                                                                                                                                                     |                                            |               |                                                                                                    |       |                             |     |    |                                                                                             |                               |                                                                                                                                                                                                                                                                                                                          |                                                                                                                 |
|-----|----------------------|--------------|----------------------------|---|----|----------|-----------------------------------------------------------------------------------------------------------------------------------------------------------------------------------------------------------------------------------------------------------------------------------------------------------------------------------------------------------------------------------------------------|--------------------------------------------|---------------|----------------------------------------------------------------------------------------------------|-------|-----------------------------|-----|----|---------------------------------------------------------------------------------------------|-------------------------------|--------------------------------------------------------------------------------------------------------------------------------------------------------------------------------------------------------------------------------------------------------------------------------------------------------------------------|-----------------------------------------------------------------------------------------------------------------|
|     |                      |              |                            |   |    |          | after the test, the patient had a seizure and was taken to emergency                                                                                                                                                                                                                                                                                                                                |                                            |               |                                                                                                    |       |                             |     |    |                                                                                             |                               |                                                                                                                                                                                                                                                                                                                          |                                                                                                                 |
| 124 | Goldman et al. 1985  | USA          | Retrospective cohort study | 8 | 46 | 7 M, 1 F | Patients were all psychiatric inpatients with a history of chronic undifferentiated schizophrenia. They all had a history of seizures and unexplained syncopal episodes                                                                                                                                                                                                                             | Neuroleptics / anticholinergic medications | Unspecified   | Seizures, syncopal episodes                                                                        | Water | "Compulsive water drinkers" | 127 | -  | Salt tablets, fluid restriction, demeclocycline                                             | -                             | Ongoing - salt tablets and fluid restriction had both failed in reducing episodes of hyponatraemia. However, demeclocycline helped to reduce the frequency and severity of hyponatraemic episodes                                                                                                                        |                                                                                                                 |
| 125 | Chen et al. 2014     | Taiwan       | Case report                | 1 | 80 | F        | Patient presented to emergency 14 times with vertigo and hyponatraemia. She developed water intoxication after developing xerostomia and polydipsia. She had a medical background which included type II diabetes and hypertension. She reported experiencing vertigo with oscillopsia, nausea and vomiting after she consumed 4 L of water over several hrs                                        | Acarbose, glimepiride, valsartan           | Acute         | Vertigo, oscillopsia, nausea, vomiting                                                             | Water | 4 L over several hrs        | 120 | -  | Water diary, add teaspoon of salt to a 600 mL bottle of sport drink/day, 3% IV saline bolus | -                             | Death - 2 yrs following her 14th hospital admission she died from pneumonia. During those 2 yrs she didn't experience any further episodes of vertigo or water intoxication                                                                                                                                              |                                                                                                                 |
| 126 | Yonemura et al. 1987 | Japan        | Case report                | 1 | 26 | M        | Patient had a history of mental retardation and was transferred to hospital with hyponatraemia. He drank 10-15 L of water for several days. After a fight with a friend, he drank a large amount of water and experienced symptoms a few hrs later                                                                                                                                                  | -                                          | Acute - hrs   | Headache, vomiting, somnolent, grand mal seizure                                                   | Water | 10-15 L/day                 | 117 | -  | Water restriction                                                                           | -                             | Ongoing - patient excreted 5.5 L of urine within the first 10 hrs. His serum Na normalised after 34 hrs (143 mmol/L). As water restriction would be difficult following discharge due to his mental retardation, he was hospitalised for 3 months. During these 3 months he experienced another 3 hyponatraemic episodes |                                                                                                                 |
| 127 | Nolte et al. 2019    | South Africa | Case report                | 1 | 26 | M        | Patient was a soldier who completed a route-march as part of a selection preparation program. Ad libitum drinking along the march was allowed. He completed the march in 8 hrs and 38 minutes                                                                                                                                                                                                       | Unspecified                                | Asymptomatic  | Asymptomatic                                                                                       | Water | 800 mL/hr                   | 134 | -  | Unspecified                                                                                 | -                             | Unspecified                                                                                                                                                                                                                                                                                                              |                                                                                                                 |
| 128 | Farrell et al. 2003  | UK           | Case report                | 1 | 64 | F        | Patient had a history of mitral valve disease. The night before her death, she drank vast amounts of water (30-40 glasses) and began vomiting. She was hysterical and distressed and shouted that she hadn't drunk enough water. She refused medical help and continued drinking after she had gone to bed. She died sometime later                                                                 | Unspecified                                | Acute - hrs   | Vomiting, hysteria, distress                                                                       | Water | 30-40 glasses               | -   | 92 | -                                                                                           | -                             | -                                                                                                                                                                                                                                                                                                                        | Death - autopsy revealed frothy pink fluid exuding from the lungs and 800 mL of watery fluid within the stomach |
| 129 | Losonczy et al. 2016 | USA          | Case report                | 1 | 41 | F        | Patient had a history of recurrent urinary tract infections and presented to emergency with nausea, dizziness, anxiety, and 2 hrs of dysuria similar to her previous UTIs. She reported that she drank 4-5 L of water over several hrs after she developed dysuria as a form of self-treatment                                                                                                      | Unspecified                                | Acute - 2 hrs | Nausea, dizziness, anxiety, dysuria, tonic-clonic seizure, diaphoretic, combative, cerebral oedema | Water | 4-5 L over several hrs      | 114 | -  | 100 mL of 3% hypertonic saline, intubation, furosemide (20 mg)                              | Neurogenic stunned myocardium | Recovery - patient became dyspneic and hypoxic after initial treatment and developed crackles throughout lung fields on auscultation. However, after intubation and furosemide, her serum Na slowly normalised over 2 days                                                                                               |                                                                                                                 |
| 130 | Sarvesvaran 1984     | UK           | Case report                | 1 | 40 | F        | Patient drank water from a cup containing bleach which had been left there by her brother for cleaning. After she realised what had happened, she phoned her local hospital and was told to drink plenty of water. She then developed vomiting and phoned a poisons unit where she was given the same advice. She was later transported to hospital after her brother found her in a confused state | Unspecified                                | Acute - 2 hrs | Vomiting, confusion, talking gibberish, seizure, semi-consciousness, pulmonary and cerebral oedema | Water | "Plenty of water"           | 111 | -  | Unspecified                                                                                 | -                             | Death - patient was pronounced brain dead a few days after admission. Autopsy revealed cerebral anoxia with terminal hypostatic bronchopneumonia                                                                                                                                                                         |                                                                                                                 |

|     |                          |        |                    |   |    |   |                                                                                                                                                                                                                                                                                                                                                                                                                                                                                                                                                                                                          |                     |             |                                                                                                                           |       |                                 |     |   |                                                                                           |   |                                                                                                                                                                                       |
|-----|--------------------------|--------|--------------------|---|----|---|----------------------------------------------------------------------------------------------------------------------------------------------------------------------------------------------------------------------------------------------------------------------------------------------------------------------------------------------------------------------------------------------------------------------------------------------------------------------------------------------------------------------------------------------------------------------------------------------------------|---------------------|-------------|---------------------------------------------------------------------------------------------------------------------------|-------|---------------------------------|-----|---|-------------------------------------------------------------------------------------------|---|---------------------------------------------------------------------------------------------------------------------------------------------------------------------------------------|
| 131 | Cicognani et al. 2013    | Italy  | Case report        | 1 | 51 | F | Patient was referred to emergency in a coma following 2 seizures. She had a history of type I diabetes and psychogenic polydipsia                                                                                                                                                                                                                                                                                                                                                                                                                                                                        | Low dose citalopram | Unspecified | Postictal coma, tonic-clonic seizures                                                                                     | Water | "Compulsive water drinking"     | 112 | - | Water restriction (< 1.5 L/day)                                                           | - | Recovery - no further symptoms occurred after her seizures resolved                                                                                                                   |
| 132 | Hanihara et al. 1997     | Japan  | Case report 1      | 1 | 58 | M | Patient had a history of undifferentiated schizophrenia and 20-yr polydipsia. His 1st episode of hyponatraemia led to a seizure and loss of consciousness. Several more episodes occurred over the years. He fractured his left femoral bone at 55 and became wheelchair-bound which prevented his excessive water intake                                                                                                                                                                                                                                                                                | Neuroleptics        | Chronic     | Seizure, loss of consciousness, lethargy                                                                                  | Water | "Excessive water intake"        | 114 | - | Elemental diet, fluid restriction (1800 mL/day), demeclocycline (600 mg/day)              | - | Ongoing - patient remained unconscious for over 1 month, during which time his hyponatraemia persisted                                                                                |
| 133 | Hanihara et al. 1997     | Japan  | Case report 2      | 1 | 52 | M | Patient had a history of undifferentiated schizophrenia and mild polydipsia. He frequently experienced ataxic gait and cognitive impairment                                                                                                                                                                                                                                                                                                                                                                                                                                                              | Unspecified         | Chronic     | Agitated, nocturnal incontinence, ataxic gait, cognitive impairment                                                       | Water | "Compulsive water drinking"     | 131 | - | Water restriction                                                                         | - | Recovery - patient remained free of any symptoms or hyponatraemic episodes despite still being moderately polydipsic                                                                  |
| 134 | Hanihara et al. 1997     | Japan  | Case report 3      | 1 | 52 | M | Patient had a history of disorganised schizophrenia and polydipsia. He had experienced various episodes of hyponatraemia throughout the years                                                                                                                                                                                                                                                                                                                                                                                                                                                            | Unspecified         | Chronic     | Agitated                                                                                                                  | Water | "Compulsive water drinking"     | 118 | - | Water restriction                                                                         | - | Ongoing - fluid restriction normalised his serum Na values, however he still experienced intermittent episodes of hyponatraemia                                                       |
| 135 | Santonastaso et al. 1998 | Italy  | Case report        | 1 | 26 | F | Patient had a 13-yr history of anorexia nervosa. She was 1st hospitalised after her weight dropped to 27 kg but she discharged herself against advice after 1 month. A few months later compulsory treatment was given through an NG tube for 3 months. Patient began to slowly eat voluntarily. She was discharged after she made considerable improvement with the agreement to have periodic visits. During a 1 month visit she complained of a headache, vomiting and seizures and was hospitalised again. She later reported that she had begun to drink compulsively to maintain her target weight | Haloperidol         | Chronic     | Headache, vomiting, seizures                                                                                              | Water | 6 L/day                         | 113 | - | Hyperosmolar infusions and forced hyperdiuresis                                           | - | Ongoing - patient continued to drink compulsively despite knowing the risks. She refused other medical control. 3 yrs later her parents reported that she remained anorexic           |
| 136 | Ramirez et al. 1993      | USA    | Letter/case report | 1 | 58 | M | Patient was admitted various times for hyponatraemia due to excessive water consumption in an attempt to stop chronic hiccups. He was admitted 7 times in 9 months before he began gamma-aminobutyric acid analog baclofen therapy. This helped to reduce his compulsive water drinking until he discontinued therapy. He subsequently began therapy again and remained well after                                                                                                                                                                                                                       | Unspecified         | Unspecified | Unspecified                                                                                                               | Water | 2-3 gallons/day                 | 111 | - | Gamma-aminobutyric acid analog baclofen therapy (20 mg orally 4 times daily)              | - | Recovery - patient's compulsive water drinking behaviours reduced with therapy and the frequency of his hiccups also decreased                                                        |
| 137 | Kott et al. 1985         | Israel | Case report        | 1 | 21 | F | Patient was a university student who presented to emergency with confusion and bizarre behaviour. She reacted to other people speaking by staring and screaming incoherent words. Her mother reported that she had drunk 30 glasses of water to prepare for an ultrasound examination for an ovarian cyst. She believed that the more she                                                                                                                                                                                                                                                                | Unspecified         | Acute - hrs | Confused, agitated, non-communicative, headache, nausea, vomiting, restlessness, tingling in limbs, loss of consciousness | Water | 30 glasses, one after the other | 127 | - | Urinary catheter, resuscitation, 300 mL NaCl 5% IV, 100 mL mannitol 20%, IV dexamethasone | - | Recovery - patient's serum Na normalised after she had a large diuresis in the first 24 hrs. She regained consciousness and was discharged after 4 days with no neurological deficits |

|     |                       |         |               |   |    |   |                                                                                                                                                                                                                                                                                                                                                                                                                                                                                                                                                                                                                                                      |                                                                |                        |                                                              |                       |                                              |     |   |                                          |                |                                                                                                                                                                                                                                                                                                                             |  |
|-----|-----------------------|---------|---------------|---|----|---|------------------------------------------------------------------------------------------------------------------------------------------------------------------------------------------------------------------------------------------------------------------------------------------------------------------------------------------------------------------------------------------------------------------------------------------------------------------------------------------------------------------------------------------------------------------------------------------------------------------------------------------------------|----------------------------------------------------------------|------------------------|--------------------------------------------------------------|-----------------------|----------------------------------------------|-----|---|------------------------------------------|----------------|-----------------------------------------------------------------------------------------------------------------------------------------------------------------------------------------------------------------------------------------------------------------------------------------------------------------------------|--|
|     |                       |         |               |   |    |   | drank, the more precise the test would be                                                                                                                                                                                                                                                                                                                                                                                                                                                                                                                                                                                                            |                                                                |                        |                                                              |                       |                                              |     |   |                                          |                |                                                                                                                                                                                                                                                                                                                             |  |
| 138 | Zilles et al. 2010    | Germany | Case report   | 1 | 26 | F | Patient had a history of schizophrenia and frequently experienced anxiety and delusions, believing that something bad would happen to herself or her friends and family. After 3 days of inpatient treatment, she experienced increased psychomotor agitation. The patient reported that she had drunk 6 half-litre bottles of mineral water within 30 minutes to help with agitation and nerves                                                                                                                                                                                                                                                     | Quetiapine (100 mg/day), lorazepam                             | Acute - hrs            | Agitation, enuresis, encopresis, vomiting, reduced vigilance | Mineral water         | 6 half-litre bottles within 30 minutes (3 L) | 112 | - | Quetiapine (700 mg), olanzapine          | -              | Recovery - patient's electrolyte abnormalities were corrected. Antipsychotic therapy was continued with quetiapine for 3 weeks before being switched to olanzapine due to lack of efficacy                                                                                                                                  |  |
| 139 | Tenyi et al. 2006     | Hungary | Case report   | 1 | 46 | M | Patient had a history of paranoid schizophrenia and had been on clozapine treatment for 4-yrs before admission to hospital with seizures and vomiting. Nurses reported that he had displayed compulsive drinking for a few days before admission                                                                                                                                                                                                                                                                                                                                                                                                     | Clozapine                                                      | Chronic - several days | Seizure, vomiting, mild muscle pain, asthenia                | Water                 | "Compulsive drinking"                        | 113 | - | Hyperosmolar sodium solution, olanzapine | Rhabdomyolysis | Recovery - hyperosmolar sodium solution was administered and the patient's serum Na normalised the next day (140 mmol/L). Clozapine was discontinued and olanzapine started on days 11 and 12. The patient was eventually discharged on day 35 with no further recurrence of rhabdomyolysis                                 |  |
| 140 | Mor et al. 1987       | Israel  | Case report   | 1 | 64 | F | Patient was admitted with stupor and polyuria. She had a history of labile hypertension, hysterectomy and bilateral cataract. She was previously hospitalised in a psychiatric institution due to delusions, anorexia and insomnia, and was subsequently diagnosed with depression with psychotic features. She responded well to neuroleptic therapy, but was readmitted 7-yrs later with delusions and a 20 kg weight gain due to excessive eating. On the day of admission, she was found by her neighbour in a stupor. She later revealed that she had drunk excessive amounts of water the day before admission after feeling unusually thirsty | Neuroleptics / levomepromazine (25 mg), oxazepam (10 mg daily) | Acute - 1 day          | Stupor, polyuria                                             | Water                 | "Excessive drinking of water"                | 119 | - | Urinary catheter                         | -              | Recovery - patient excreted 1.9 L of clear, hypotonic urine after urinary catheter was inserted. She regained consciousness after excreting 6780 mL of urine within the 1st day of hospitalisation. After correction of serum Na, she was transferred to a psychiatric hospital for further treatment of psychotic symptoms |  |
| 141 | Johansson et al. 2002 | Sweden  | Case report 1 | 1 | 33 | F | Patient was a healthy 33-yr old woman expecting her first child. She had a normal pregnancy, but 9 hrs after admission began to vomit and became somnolent. A caesarean was performed, during which she had seizures. She later reported drinking several litres of water and fruit juice over 9hrs                                                                                                                                                                                                                                                                                                                                                  | Unspecified                                                    | Acute - 9 hrs          | Somnolent, vomiting, seizures                                | Water and fruit juice | Several litres over 9 hrs                    | 115 | - | Unspecified                              | -              | Unspecified                                                                                                                                                                                                                                                                                                                 |  |
| 142 | Johansson et al. 2002 | Sweden  | Case report 2 | 1 | 30 | F | Patient was a healthy woman who had a normal delivery at 40 weeks. IV infusion of oxytocin was started 5 hrs before delivery due to weak contractions                                                                                                                                                                                                                                                                                                                                                                                                                                                                                                | Oxytocin (300 mL)                                              | Asymptomatic           | Asymptomatic                                                 | Water                 | > 8 L in 23 hrs                              | 129 | - | Unspecified                              | -              | Unspecified                                                                                                                                                                                                                                                                                                                 |  |
| 143 | Goldman et al. 1994   | USA     | Cohort study  | 4 | 34 | M | 4 inpatients with chronic undifferentiated schizophrenia and recent hyponatraemia were given unlimited water for 1 week, Gatorade plus water for 3 weeks and then water again for 1 week to test the effect of electrolyte-containing beverages on water imbalance. All patients consumed a large amount of                                                                                                                                                                                                                                                                                                                                          | Chlorpromazine (4), lithium (1), clonazepam (1)                | Asymptomatic           | Asymptomatic                                                 | Gatorade, water       | 4.9 L/day                                    | 132 | - | Electrolyte-containing beverages         | -              | Ongoing - patients didn't appear to benefit from the electrolyte-containing beverages as serum Na remained the same                                                                                                                                                                                                         |  |



|     |                         |             |                                |    |    |             |                                                                                                                                                                                                                                                                                                                                                                                                                                                                                                                                                                                                                                                                                                     |                                                                                                                                                    |             |                                                                                                                                   |                |                                            |     |   |                                                                                           |   |                                                                                                                                                                                                                 |
|-----|-------------------------|-------------|--------------------------------|----|----|-------------|-----------------------------------------------------------------------------------------------------------------------------------------------------------------------------------------------------------------------------------------------------------------------------------------------------------------------------------------------------------------------------------------------------------------------------------------------------------------------------------------------------------------------------------------------------------------------------------------------------------------------------------------------------------------------------------------------------|----------------------------------------------------------------------------------------------------------------------------------------------------|-------------|-----------------------------------------------------------------------------------------------------------------------------------|----------------|--------------------------------------------|-----|---|-------------------------------------------------------------------------------------------|---|-----------------------------------------------------------------------------------------------------------------------------------------------------------------------------------------------------------------|
|     |                         |             |                                |    |    |             | gatorade and stated that they preferred it to water                                                                                                                                                                                                                                                                                                                                                                                                                                                                                                                                                                                                                                                 |                                                                                                                                                    |             |                                                                                                                                   |                |                                            |     |   |                                                                                           |   |                                                                                                                                                                                                                 |
| 144 | Raskind 1974            | USA         | Case report                    | 1  | 56 | F           | Patient was admitted to hospital following the ingestion of 6 glutethimide tablets in an apparent suicide attempt after a fight with her son. She had a history of psychotic depression and schizophrenia and had been hospitalised various times in the past. She had a medical background of moderate hypertension. While in hospital she slept little and spent most of her time in the bathroom or by the water fountain                                                                                                                                                                                                                                                                        | Hydroflumet hiazide, thioridazine, hydrochlorid e (50 mg)                                                                                          | Acute - hrs | Agitated, irrational, difficulty sleeping, emotionally labile, paranoid, nauseous, urinary urgency, confused, incoherent          | Water          | "Copious amounts"                          | 111 | - | Intubation, ventilation                                                                   | - | Death - patient's serum Na normalised after 3 days (138 mmol/L). However, her symptoms remained unchanged and she died the following day. Autopsy revealed cerebral oedema                                      |
| 145 | Musch et al. 2003       | Belgium     | Prospective uncontrolled study | 10 | 55 | Unspecified | Patients all had a history of polydipsia and hyponatraemia. Medical histories included schizophrenia, psychotic disease and alcohol abuse. 4 were compulsive water drinkers and 6 compulsive beer drinkers                                                                                                                                                                                                                                                                                                                                                                                                                                                                                          | Unspecified                                                                                                                                        | Unspecified | Drowsiness, weakness, confusion                                                                                                   | Water and beer | > 4 L/day                                  | 126 | - | 2 L isotonic saline over 24 hrs                                                           | - | Recovery - patients' serum Na improved to 135 mmol/L after 24 hrs of isotonic saline                                                                                                                            |
| 146 | Mercier-Guidez 1998     | France      | Letter/case report             | 1  | 43 | M           | Patient had a 16-yr history of psychogenic polydipsia and drank up to 13 L of fluids/day. He had a history of disorganised schizophrenia and had been hospitalised various times throughout the years. He was a heavy smoker                                                                                                                                                                                                                                                                                                                                                                                                                                                                        | Neuroleptics                                                                                                                                       | Chronic     | Coma, vomiting, tremors, confusion, agitation, seizures, neuroleptic malignant syndrome, drowsiness, emotional lability, delirium | Fluids         | 13 L/day                                   | 110 | - | Ventilation, behavioural treatment, fluid restriction                                     | - | Recovery - behavioural treatment and fluid restriction over 6 months resulted in a significant reduction in symptoms                                                                                            |
| 147 | Gopal et al. 2000       | USA         | Case report                    | 1  | 58 | F           | Patient presented to her physician's office after 1 week of vaginal spotting. She was referred for a pelvic ultrasound examination. She had a history of hypertension, chronic constipation, self-induced vomiting for weight loss and smoking. She reported checking the locks on her doors multiple times a day but never sought medical care for obsessive and compulsive tendencies. Before her procedure she was advised to drink several litres of water. During an initial scan, the radiology technician noted that her bladder was not distended fully so encouraged her to drink more water. After consuming 3 more litres of water within an hr, she developed symptoms of hyponatraemia | Nisoldipine (30 mg once daily), vitamin E (400 IU daily), multivitamin tablet (once daily), phenolphthalein (1 square every 2 to 3 days as needed) | Acute - hrs | Drowsy, disoriented, nausea, vomiting, grand mal tonic-clonic seizures                                                            | Water          | Several litres + 3 more litres within 1 hr | 118 | - | Promethazine (25 mg), 0.9% saline, IV diazepam, oxygen, water restriction                 | - | Recovery - the patient's serum Na normalised and she was discharged on the 5th hospital day. She received outpatient care for a year and remained symptom-free                                                  |
| 148 | Moshiri et al. 2014     | USA         | Case report                    | 1  | 81 | F           | Patient had a history of COPD, hypertension, anxiety disorder, constipation, anorexia, weight loss, fatigue and non-pruritic maculo-papular rash. After her physician mentioned the benefits of water intake, she began ingesting large amounts                                                                                                                                                                                                                                                                                                                                                                                                                                                     | Amlodipine, valsartan, hydrochlorothiazide, bronchodilators, quetiapine, clonazepam                                                                | Unspecified | Unspecified                                                                                                                       | Water          | "Excessive water intake"                   | 122 | - | Fluid restriction, discontinuation of hydrochlorothiazide, hydroxychloroquine (for lupus) | - | Recovery - patient's serum Na improved after discontinuation of hydrochlorothiazide and fluid restriction                                                                                                       |
| 149 | Lightenberg et al. 1998 | Netherlands | Letter/case report             | 1  | 34 | F           | A previously healthy patient was admitted due to loss of consciousness after 1 day of anxiety and hallucinations. She had been compulsively drinking for several hrs                                                                                                                                                                                                                                                                                                                                                                                                                                                                                                                                | -                                                                                                                                                  | Acute - hrs | Anxiety, hallucinations, loss of consciousness, bilateral lung oedema, cerebellar herniation                                      | Water          | > 6 L over several hrs                     | 114 | - | Mannitol                                                                                  | - | Death - mannitol did not improve the patient's neurological state and she was confirmed to be brain dead 8 hrs after admission. Autopsy revealed cerebral oedema, cerebellar herniation and edema in both lungs |
| 150 | Gardner 2002            | USA         | Case report 1                  | 1  | 18 | M           | A previously healthy soldier drank 8 quarts of water over a few hrs on a hot day and subsequently developed                                                                                                                                                                                                                                                                                                                                                                                                                                                                                                                                                                                         | -                                                                                                                                                  | Acute - hrs | Vomiting, dizziness, headache, nausea, confusion, lethargy, loss of consciousness, diffuse                                        | Water          | 20 quarts over several hrs                 | 121 | - | Unspecified                                                                               | - | Death - patient died from diffuse cerebral and brainstem oedema                                                                                                                                                 |

|     |                        |              |                       |    |    |          |                                                                                                                                                                                                                                                                                                                                                               |                     |                   |                                                                                                |                                    |                                                                  |     |   |                                                        |                |                                                                                                                                                                                                                  |
|-----|------------------------|--------------|-----------------------|----|----|----------|---------------------------------------------------------------------------------------------------------------------------------------------------------------------------------------------------------------------------------------------------------------------------------------------------------------------------------------------------------------|---------------------|-------------------|------------------------------------------------------------------------------------------------|------------------------------------|------------------------------------------------------------------|-----|---|--------------------------------------------------------|----------------|------------------------------------------------------------------------------------------------------------------------------------------------------------------------------------------------------------------|
|     |                        |              |                       |    |    |          | symptoms of hyponatraemia which were mistakenly attributed to dehydration. He then drank up to 10 quarts more water over the next 2 hrs and died from cerebral and brainstem edema                                                                                                                                                                            |                     |                   | cerebral and brainstem edema                                                                   |                                    |                                                                  |     |   |                                                        |                |                                                                                                                                                                                                                  |
| 151 | Gardner 2002           | USA          | Case report 2         | 1  | 20 | M        | Patient was a Marine Corps recruit who presented to a field aid station on a hot day after 9 hrs of hiking with an 18 kg pack and maneuvering obstacle courses. He had a cough and experienced a generalised seizure. He reported drinking at least 6 canteens of water over 2-3 hrs                                                                          | Unspecified         | Acute - 2-3 hrs   | Cough, seizure                                                                                 | Water                              | 6 canteens over 2-3 hrs                                          | 113 | - | Unspecified                                            | -              | Recovery - patient excreted around 6.5 L of urine over 14 hrs and was discharged after 5 days in hospital                                                                                                        |
| 152 | Gardner 2002           | USA          | Case report 3         | 1  | 19 | M        | A Marine died from cerebral oedema after a 26-mile march. He completed the 8-hr march carrying a pack weighing more than 90 pounds. Towards the end of the march he began vomiting and developed altered mental status. He was reported to have drunk at least 1 gallon of water the night before the march                                                   | Unspecified         | Acute - overnight | Altered mental status, confusion, acidosis, lethargy, vomiting, fatigue, coma, cerebral oedema | Water                              | 1 gallon over an evening                                         | 128 | - | Unspecified                                            | Rhabdomyolysis | Death - patient's lethargy progressed to coma and he was declared brain dead the next day due to cerebral oedema                                                                                                 |
| 153 | Kipps et al. 2011      | UK           | Cross-sectional study | 11 | 37 | 4 M, 7 F | Runners in the London Marathon were recruited at race registration to participate in a study investigating the effects of water intake on development of exercise-associated hyponatraemia. The 11 runners who developed asymptomatic hyponatraemia were assessed for fluid intake volume and compared against the runners who didn't develop hyponatraemia   | Unspecified         | Asymptomatic      | Asymptomatic                                                                                   | Water and sports drinks            | 3.7 L or 843 mL/hr                                               | 132 | - | Unspecified                                            | -              | Unspecified                                                                                                                                                                                                      |
| 154 | Tilley et al. 2011     | USA          | Case report           | 1  | 37 | M        | A previously healthy Air Force soldier had a history of obstructive sleep apnea. He was instructed to report for a urine drug screen test where he needed to produce urine under direct visual observation. After a 1st unsuccessful attempt, the patient drank over 14 L of water within 3 hrs. He developed hyponatraemia and was quickly taken to hospital | Modafinil           | Acute - 3 hrs     | Abdominal pain, confusion, restless, inarticulate, seizure                                     | Water                              | 14 L in 3 hrs                                                    | 122 | - | IV normal saline, lorazepam, Foley catheter            | -              | Recovery - patient excreted 4.5 L of urine within 90 minutes of admission and his serum Na increased considerably. His serum Na eventually normalised (139 mmol/L) and he was discharged the following afternoon |
| 155 | Hariprasad et al. 1980 | USA          | Cohort study          | 16 | 50 | M        | Patients were all hospitalised with a history of hyponatraemia. Some had schizophrenia and some had organic brain syndrome. Patients all engaged in compulsive drinking behaviours with varying levels of severity. Patients drank from various sources (e.g. showers, toilets, water fountains)                                                              | Antipsychotic drugs | Unspecified       | Headache, lethargy, coma, recurrent seizures                                                   | Fluids                             | 7-43 L/day                                                       | 111 | - | Water restriction, 5% IV NaCl (1)                      | -              | Recovery - patients responded well to infusions of hypertonic saline (3% to 5%)                                                                                                                                  |
| 156 | Noakes et al. 2004     | South Africa | Case report           | 1  | 34 | M        | Patient was an experienced ultramarathon runner who competed in his 1st Ironman triathlon. Before the race, he agreed to participate in a study investigating the effects of sodium supplementation during prolonged exercise and was given starch-containing tablets to take (4-8/hr). He finished the                                                       | Unspecified         | Acute - 12 hrs    | Mildly confused, swollen face, oedema in hands, difficulty concentrating, sleepy               | Water, coca cola and sports drinks | 750 mL/hr while cycling + "drink as much as possible" afterwards | 127 | - | Fluid restriction, 16 NaCl tablets, furosemide (50 mg) | -              | Recovery - patient passed 4.1 L of urine overnight at the hospital and was discharged the following day with normal serum Na (136 mmol/L)                                                                        |

|     |                       |        |                                  |    |    |            |                                                                                                                                                                                                                                                                                                                                                                                                                                                                                           |                                                                  |                 |                                                                                                                                       |                              |                                                            |     |   |                                                                                                                   |                  |                                                                                                                                                                                                                                  |
|-----|-----------------------|--------|----------------------------------|----|----|------------|-------------------------------------------------------------------------------------------------------------------------------------------------------------------------------------------------------------------------------------------------------------------------------------------------------------------------------------------------------------------------------------------------------------------------------------------------------------------------------------------|------------------------------------------------------------------|-----------------|---------------------------------------------------------------------------------------------------------------------------------------|------------------------------|------------------------------------------------------------|-----|---|-------------------------------------------------------------------------------------------------------------------|------------------|----------------------------------------------------------------------------------------------------------------------------------------------------------------------------------------------------------------------------------|
|     |                       |        |                                  |    |    |            | race in 12 hrs but became mildly confused and sleepy. He had visible edema in his hands                                                                                                                                                                                                                                                                                                                                                                                                   |                                                                  |                 |                                                                                                                                       |                              |                                                            |     |   |                                                                                                                   |                  |                                                                                                                                                                                                                                  |
| 157 | Oh et al. 2018        | USA    | Case report 1                    | 1  | 31 | F          | Patient was a soldier conducting a 12-mile timed foot march. She carried 35 lbs on her back and began to feel dizzy at mile 6. She collapsed and later reported having drunk around 4.5 quarts of water in 2 hrs                                                                                                                                                                                                                                                                          | Unspecified                                                      | Acute - 2 hrs   | Dizzy, collapsed                                                                                                                      | Water                        | 4.5 quarts over 2 hrs                                      | 129 | - | 2.5 L of 0.9% normal saline                                                                                       | -                | Recovery - patient's serum Na normalised to 136 mmol/L and she was subsequently discharged                                                                                                                                       |
| 158 | Oh et al. 2018        | USA    | Case report 2                    | 1  | 27 | F          | Patient was a soldier who presented to emergency after collapsing during a 12-mile timed foot march. She reported drinking "a lot" over the 2.5 hrs                                                                                                                                                                                                                                                                                                                                       | Unspecified                                                      | Acute - 2.5 hrs | Collapsed                                                                                                                             | Water                        | 5 quarts over 2.5 hrs                                      | 131 | - | 0.9% normal saline infusion                                                                                       | -                | Recovery - patient excreted a significant amount of urine and was discharged back to her unit                                                                                                                                    |
| 159 | Oh et al. 2018        | USA    | Case report 3                    | 1  | 27 | M          | Patient was a soldier who presented to emergency for weakness and dizziness. He had been conducting an outdoor training event and reported drinking 6 quarts of water in 2 hrs                                                                                                                                                                                                                                                                                                            | Unspecified                                                      | Acute - 2 hrs   | Weakness, dizziness, nausea, vomiting                                                                                                 | Water                        | 6 quarts in 2 hrs                                          | 125 | - | 0.9% normal saline bolus, fluid restriction, oral hypertonic broth (120 mL oral solution of 3% hypertonic saline) | -                | Recovery - patient tolerated treatment well and had a large volume diuresis. His serum Na normalised within 8 hrs and he was discharged after an overnight stay (140 mmol/L)                                                     |
| 160 | Tanneau et al. 1993   | France | Retrospective case-control study | 72 | 65 | 31 M, 41 F | Medical records of elderly and younger patients who were hospitalised with hyponatraemia at 4 different medical units were reviewed. Patients had a history of meningitis, carcinoma, pulmonary disease, head trauma and psychogenic polydipsia. Psychogenic polydipsia was the most common cause of hyponatraemia in the younger patients, while thiazide diuretics played a role in development of hyponatraemia in the older patients                                                  | Thiazide diuretics, spironolactone, amiloride                    | Unspecified     | Weakness, anorexia, nausea, vomiting, confusion, disorientation, drowsiness, agitation, psychosis, headaches, vertigo, ataxia, tremor | Water                        | "Compulsive drinking"                                      | 110 | - | Hypertonic saline, isotonic saline, fluid restriction                                                             | Brain damage (3) | Recovery + death - most patients recovered after treatment, but 11 patients died due to underlying diseases (e.g. stroke, pneumonia, COPD). 7 of the patients who died were of the older patient group and 4 of the younger      |
| 161 | Madero et al. 2015    | Mexico | Case report                      | 1  | 57 | F          | Patient was a previously healthy flight attendant with a history of essential hypertension. During a flight from London to Mexico City, she drank excessive amounts of water like she had on previous flights. However, she developed a headache and nausea, and upon arrival to Mexico City was transferred to a hospital where she suffered a seizure                                                                                                                                   | Angiotensin converting enzyme inhibitor (ACE), thiazide diuretic | Acute - hrs     | Headache, nausea, disorientation, tonic clonic seizure, cerebral oedema                                                               | Water                        | "Significant amount of water"                              | 116 | - | Intubation, diazepam, vasopressors, 3% hypertonic saline                                                          | -                | Recovery - patient's serum Na increased to 135 mmol/L within 12 hrs after she excreted a significant amount of urine. She was discharged after 5 days, and when contacted 2 months later, she reported no clinical abnormalities |
| 162 | Rosenbaum et al. 1979 | USA    | Case report 1                    | 1  | 48 | M          | Patient was a married school teacher who was taken to hospital by police after he claimed to be trying to reach the CIA and Food and Drug Administration because "doctors were trying to kill him" and had given him "poisoned pills" that would lead to "death by dehydration". Patient was a heavy smoker (3 packs/day) and had been drinking excessive amounts of alcohol for several months. Because of his delusional beliefs, he had also begun to drink excessive amounts of water | Unspecified                                                      | Unspecified     | Bizarre behaviour, vomiting, paranoid, delusional, confused                                                                           | Water                        | "Compulsively ingest large quantities of water"            | 115 | - | Water restriction, IV normal saline, trifluoperazine (40 mg)                                                      | -                | Recovery - patient's serum Na normalised after 48 hrs (139 mmol/L). He was diagnosed with psychotic depression and transferred for treatment of his psychiatric illness. With treatment, his psychosis resolved                  |
| 163 | Rosenbaum et al. 1979 | USA    | Case report 2                    | 1  | 35 | M          | Patient was brought to emergency by ambulance with convulsions. He had 2 grand mal seizures upon arrival. He had a history of hospitalisations for chronic paranoid schizophrenia                                                                                                                                                                                                                                                                                                         | Psychotropic medications                                         | Acute - hrs     | Grand mal seizures                                                                                                                    | Water, orange and grapefruit | 20 glasses of water + orange and grapefruit juice and milk | 116 | - | Phenobarbital, phenytoin, IV normal saline, water restriction                                                     | -                | Recovery - patient's serum Na normalised after 2 days. He was then transferred to a psychiatric hospital for treatment                                                                                                           |

|     |                       |        |               |   |    |   |                                                                                                                                                                                                                                                                                                                                                                                                                                                                                                                                                                                                                                                                                                                                                                                                                                      |                           |             |                                                                                                                                                  |       |                                         |               |   |                                                                                                                                                               |                                                |                                                                                                                                                                                                                                                                                                                                |
|-----|-----------------------|--------|---------------|---|----|---|--------------------------------------------------------------------------------------------------------------------------------------------------------------------------------------------------------------------------------------------------------------------------------------------------------------------------------------------------------------------------------------------------------------------------------------------------------------------------------------------------------------------------------------------------------------------------------------------------------------------------------------------------------------------------------------------------------------------------------------------------------------------------------------------------------------------------------------|---------------------------|-------------|--------------------------------------------------------------------------------------------------------------------------------------------------|-------|-----------------------------------------|---------------|---|---------------------------------------------------------------------------------------------------------------------------------------------------------------|------------------------------------------------|--------------------------------------------------------------------------------------------------------------------------------------------------------------------------------------------------------------------------------------------------------------------------------------------------------------------------------|
|     |                       |        |               |   |    |   | and had stopped antipsychotic medication at the time of admission. His mother reported that the afternoon prior to admission he had gotten up every 5 minutes to drink "water, orange and grapefruit juice, milk... like nothing I'd ever seen before". His father found a bottle of "Old English" furniture polish in his room, opened and missing 1 inch of volume                                                                                                                                                                                                                                                                                                                                                                                                                                                                 |                           |             |                                                                                                                                                  |       |                                         |               |   |                                                                                                                                                               |                                                | juice, milk                                                                                                                                                                                                                                                                                                                    |
| 164 | Rosenbaum et al. 1979 | USA    | Case report 3 | 1 | 21 | F | Patient presented to emergency following a grand mal seizure. She had a history of hospitalisations for chronic schizophrenia, psychosis and self-destructive behaviour. She was diagnosed with psychogenic polydipsia. After successful treatment the 1st time around, she presented again 19 days later with another episode of hyponatraemia. This was also successfully treated. However, when she was given unrestricted access to cigarettes, her ability to dilute her urine was diminished. Thus, she was diagnosed with mild SIADH from nicotine                                                                                                                                                                                                                                                                            | Thioridazine (300 mg/day) | Acute       | Grand mal seizure, coma                                                                                                                          | Water | "Drinking from the shower heads"        | 100, then 117 | - | Normal saline, water restriction, haloperidol (20 mg/day)                                                                                                     | -                                              | Recovery - patient's serum Na normalised and she was discharged back to her normal state hospital                                                                                                                                                                                                                              |
| 165 | Garigan et al. 1999   | USA    | Case report   | 1 | 18 | M | Patient was a soldier in his 4th week of Army basic training. He was previously healthy. He drank 1 quart of water (1 canteen) upon waking, another after training and 1 more before arriving at the rifle range. During rifle training he sweated profusely so drank another 2 quarts. By mid morning he was complaining of thirst and drank 3 more quarts. When he developed symptoms of hyponatraemia, they were mistaken for dehydration and was instructed to drink another 2 quarts in the shade. He urinated only once upon arriving at training. When his symptoms didn't improve, he was encouraged to drink another 10 quarts during the next 90 minutes. He was eventually taken to hospital with acute respiratory distress where he suffered cardiac arrest. He was diagnosed with diabetes insipidus while in hospital | -                         | Acute - hrs | Dizziness, throbbing headache, nausea, pale, thirsty, vomiting, coma, respiratory distress, confused, lethargic, frothy sputum, pulmonary oedema | Water | 20 quarts over 4 hrs                    | 115           | - | IV normal saline, intubation, IV phenytoin, mannitol                                                                                                          | Sepsis, disseminated intravascular coagulation | Death - although serum Na normalised and patient diuresed a significant amount of urine, he remained comatose. He suffered a cardiac arrest several days after admission to hospital. Autopsy revealed diffuse cerebral and brainstem oedema without myelinolysis and focal autolysis versus infarction of the adenohypophysis |
| 166 | Sjblom et al. 1997    | Sweden | Case report   | 1 | 27 | F | A previously healthy mother was brought to emergency unconscious with seizures. The day before, her 1-yr old son had gotten sick with diarrhoea. She began experiencing symptoms too and spent most of the day vomiting and experiencing diarrhoea. Her husband recommended that she drink lots of water and she took his advice by drinking directly from the tap during the next 3-4 hrs. She was taken to hospital after her                                                                                                                                                                                                                                                                                                                                                                                                      | Unspecified               | Acute - hrs | Vomiting, seizure, exhaustion, unresponsiveness, loss of consciousness, cerebral edema                                                           | Water | Drank directly from the tap for 3-4 hrs | 106           | - | IV diazepam (10 mg), intubation, mechanical ventilation, hypertonic saline infusion, isotonic saline with potassium, furosemide (20 mg), betamethasone (8 mg) | -                                              | Death - patient remained unconscious and was diagnosed as brain dead. Autopsy revealed pronounced cerebral oedema with cerebellar herniation                                                                                                                                                                                   |

|     |                       |            |                            |    |    |          |                                                                                                                                                                                                                                                                                                                                                                                                                                                                                                              |                                                                                                                                                                   |                |                                                                                             |                                                                                                                                                    |                                                              |                             |     |                                                                                              |                                                  |                                                                                                                                                                                                                                                                                                                             |                                                                                                                                                                                                                                                            |
|-----|-----------------------|------------|----------------------------|----|----|----------|--------------------------------------------------------------------------------------------------------------------------------------------------------------------------------------------------------------------------------------------------------------------------------------------------------------------------------------------------------------------------------------------------------------------------------------------------------------------------------------------------------------|-------------------------------------------------------------------------------------------------------------------------------------------------------------------|----------------|---------------------------------------------------------------------------------------------|----------------------------------------------------------------------------------------------------------------------------------------------------|--------------------------------------------------------------|-----------------------------|-----|----------------------------------------------------------------------------------------------|--------------------------------------------------|-----------------------------------------------------------------------------------------------------------------------------------------------------------------------------------------------------------------------------------------------------------------------------------------------------------------------------|------------------------------------------------------------------------------------------------------------------------------------------------------------------------------------------------------------------------------------------------------------|
|     |                       |            |                            |    |    |          | husband found her exhausted and semi-unresponsive                                                                                                                                                                                                                                                                                                                                                                                                                                                            |                                                                                                                                                                   |                |                                                                                             |                                                                                                                                                    |                                                              |                             |     |                                                                                              |                                                  |                                                                                                                                                                                                                                                                                                                             |                                                                                                                                                                                                                                                            |
| 167 | Ellinas et al. 1993   | USA        | Retrospective cohort study | 15 | 42 | 9 M, 6 F | Medical records of patients who had been hospitalised with hyponatraemia from 1986 to 1989 at a hospital in New York were reviewed. All patients had a history of polydipsia and were heavy smokers. 13 had chronic schizophrenia, 1 had bipolar depression with psychotic features, and 1 had no psychiatric history but was a chronic alcoholic                                                                                                                                                            | Chlorpromazine, fluphenazine, thioridazine, perphenazine, trifluoperazine, loxapine, haloperidol, chlorpropamide, tolazamide, nonsteroidal anti-inflammatory drug | Unspecified    |                                                                                             | Grand mal seizures (14), tonic-clonic seizures (10), bizarre behaviour, change in mental status, lethargy, respiratory failure, status epilepticus | Water                                                        | "Compulsive water drinking" | 115 | -                                                                                            | Fluid restriction, 3% normal saline infusion (5) | -                                                                                                                                                                                                                                                                                                                           | Recovery + death - 14 patients recovered with treatment and were discharged, however, 1 patient died on the day of admission. This patient was the only nonpsychiatric patient and presented due to a 3-day alcohol binge in a diabetic hyperosmolar state |
| 168 | Cosgray et al. 1990   | USA        | Case report                | 1  | 41 | M        | Patient was admitted to a psychiatric facility with symptoms of mental impairment. Several weeks after admission he began to exhibit urinary incontinence and withdrawal. Staff members observed the patient making frequent trips to the water fountain. He eventually suffered a grand mal seizure and was transferred to hospital for treatment                                                                                                                                                           | Unspecified                                                                                                                                                       | Chronic        | Grand mal seizure, withdrawal, confusion, slurred speech                                    | Water                                                                                                                                              | "Frequent trips to the water fountain"                       | 103                         | -   | IV diazepam, normal saline with potassium supplement                                         | -                                                | Recovery - patient made a steady recovery and was discharged                                                                                                                                                                                                                                                                |                                                                                                                                                                                                                                                            |
| 169 | Rao et al. 2011       | India      | Case report                | 1  | 38 | F        | Patient had an 8-yr history of paranoid schizophrenia. She discontinued her medication 6 months earlier and her symptoms exacerbated. She also began to drink water excessively                                                                                                                                                                                                                                                                                                                              | Antipsychotics                                                                                                                                                    | Chronic        | Delusions, auditory hallucinations, social withdrawal, decreased sleep and appetite         | Water                                                                                                                                              | 8 L/day                                                      | 123                         | -   | Risperidone (6 mg/day), trihexyphenidyl (2 mg/day), fluid restriction                        | -                                                | Recovery - after 6 weeks, the patient's symptoms improved. Her water intake decreased to 2 L/day and her serum Na normalised (138 mmol/L)                                                                                                                                                                                   |                                                                                                                                                                                                                                                            |
| 170 | Radojevic et al. 2012 | Montenegro | Case report 1              | 1  | 38 | M        | Patient had a history of schizophrenia and occasionally engaged in the excessive intake of water. He was found dead in his apartment next to the sink, with the tap still running                                                                                                                                                                                                                                                                                                                            | Unspecified                                                                                                                                                       | Unspecified    | Brain and lung oedema                                                                       | Water                                                                                                                                              | "Intake of copious amounts of water"                         | -                           | 112 | -                                                                                            | -                                                | Death - patient was found dead in his apartment next to the sink. Autopsy revealed general congestion, brain and lung oedema and 1000 mL of urine in the bladder                                                                                                                                                            |                                                                                                                                                                                                                                                            |
| 171 | Radojevic et al. 2012 | Montenegro | Case report 2              | 1  | 40 | M        | Patient had a 14-yr history of schizophrenia and began experiencing polydipsia 1-yr prior to his death. He was frequently seen drinking an excessive amount of water by staff who provided psychiatric treatment. He died 4 hrs after admission to hospital with disturbance of consciousness                                                                                                                                                                                                                | Neuroleptic (nosinan)                                                                                                                                             | Acute - hrs    | Vomiting, nausea, pale, unable to speak, disturbance of consciousness, urinary incontinence | Water                                                                                                                                              | "Continuous drinking of extremely large quantities of water" | 98                          | -   | Resuscitation                                                                                | -                                                | Death - patient died 4 hrs after hospital admission despite therapeutic and resuscitating measures. Autopsy revealed oedematous brain (1370 g) and lungs (800 and 850 g), a heart weighing 420 g and extremely dilated stomach with 1400 ccm of brownish fluid. Other organs also showed congestion and interstitial oedema |                                                                                                                                                                                                                                                            |
| 172 | McDaniel et al. 2010  | USA        | Case report 1              | 1  | 30 | M        | Patient had a history of schizoaffective disorder and cocaine dependence. He presented twice within 2 weeks with exacerbations of psychosis due to discontinuation of his medications. During his hospitalisation, he would take paper clips from the nursing station and swallow them. He also worked a steel bracket and screw loose from the wall and swallowed them. X-rays revealed cap and wires used to secure cork stoppers and other pieces of unidentified metal in his stomach. A high-fibre diet | Divalproex (1500 mg/day), risperidone (4 mg), cocaine                                                                                                             | Acute - 26 hrs | Euphoria, rapid speech, mute immobility                                                     | Water                                                                                                                                              | 17 cups/day                                                  | 124                         | -   | Lorazepam (2 mg 3-4 times daily), divalproex, risperidone, demeclocycline, fluid restriction | -                                                | Recovery - patient's psychotic symptoms resolved with treatment and excessive water drinking behaviours also stopped                                                                                                                                                                                                        |                                                                                                                                                                                                                                                            |

|     |                      |             |               |   |    |   |                                                                                                                                                                                                                                                                                                                                                                                                                                                                                                                |                                                                                                       |             |                                                                                                                                                    |                               |                          |     |   |                                                                                                                                |                |                                                                                                                                                                                                                                                                                                                                                                                                                                                                                            |  |
|-----|----------------------|-------------|---------------|---|----|---|----------------------------------------------------------------------------------------------------------------------------------------------------------------------------------------------------------------------------------------------------------------------------------------------------------------------------------------------------------------------------------------------------------------------------------------------------------------------------------------------------------------|-------------------------------------------------------------------------------------------------------|-------------|----------------------------------------------------------------------------------------------------------------------------------------------------|-------------------------------|--------------------------|-----|---|--------------------------------------------------------------------------------------------------------------------------------|----------------|--------------------------------------------------------------------------------------------------------------------------------------------------------------------------------------------------------------------------------------------------------------------------------------------------------------------------------------------------------------------------------------------------------------------------------------------------------------------------------------------|--|
|     |                      |             |               |   |    |   | helped the patient to pass these objects in his stool                                                                                                                                                                                                                                                                                                                                                                                                                                                          |                                                                                                       |             |                                                                                                                                                    |                               |                          |     |   |                                                                                                                                |                |                                                                                                                                                                                                                                                                                                                                                                                                                                                                                            |  |
| 173 | McDaniel et al. 2010 | USA         | Case report 2 | 1 | 58 | F | Patient had a history of bipolar disorder and alcoholism. She had been hospitalised several times in the past with paranoid delusions and auditory hallucinations                                                                                                                                                                                                                                                                                                                                              | Divalproex, lorazepam                                                                                 | Unspecified | Catatonic, agitated, meaningless activity                                                                                                          | Water                         | "Excessive drinking"     | 122 | - | Fluid restriction, demeclocycline (300 mg), valproic acid (1500 mg/day)                                                        | -              | Recovery - patient's symptoms and polydipsia were successfully treated                                                                                                                                                                                                                                                                                                                                                                                                                     |  |
| 174 | McDaniel et al. 2010 | USA         | Case report 3 | 1 | 54 | F | Patient had a 30-yr history of bipolar disorder with several episodes of mania and psychosis. She had been stable on lithium for 25 yrs. However, any attempts to withdraw fluoxetine resulted in relapsing depression. She had also been drinking excessive amounts of water for 25 yrs and was diagnosed with psychogenic polydipsia. During a recent episode, she demonstrated odd mannerisms such as saluting people and beginning and ending conversations with a "hearty handshake" which she verbalised | Lithium (900 mg/day), fluphenazine (5 mg/day), fluoxetine (60 mg/day), lorazepam (1 mg 3 times daily) | Unspecified | Depressed mood, hallucinations, paranoid delusions, motor excitement followed by muteness and staring                                              | Fluids                        | "Increased fluid intake" | 123 | - | Resuming regular doses of lithium, increasing lorazepam dose, fluid restriction                                                | -              | Recovery - patient's symptoms resolved after resuming her regular doses of lithium (she had missed a few doses) and increasing doses of lorazepam. She continued her fluid restriction by buying a 1 L bottle that she filled once a day                                                                                                                                                                                                                                                   |  |
| 175 | Chen et al. 2006     | China       | Case report   | 1 | 54 | F | Patient was admitted with vomiting, seizures and bizarre behaviour. Her family reported that she had consumed 6 L of water in preparation for a colonoscopy. The colonoscopy revealed narrow stools and unexplained anaemia                                                                                                                                                                                                                                                                                    | Unspecified                                                                                           | Acute       | Vomiting, headache, bizarre behaviour, seizure                                                                                                     | Water                         | 6 L                      | 118 | - | Furosemide (60 mg), 3% hypertonic saline infusion, mannitol, bicarbonate                                                       | Rhabdomyolysis | Recovery - patient regained consciousness and serum Na increased. 10 L of IV fluid were given over 3 days until she recovered                                                                                                                                                                                                                                                                                                                                                              |  |
| 176 | Iwazu et al. 2007    | Japan       | Case report   | 1 | 66 | F | Patient was admitted due to vomiting and loss of appetite. She had a cold 2 days prior to admission which developed into acute viral bronchitis. She had a history of hyperlipidaemia and hypertension, and had been taking various cold medications. She drank a large amount of water to ease throat inflammation                                                                                                                                                                                            | Salicylamide (270 mg), acetaminophen (150 mg), promethazine methylenedil salicylate (13.5 mg)         | Unspecified | Nausea, vomiting, headache, coma, seizures                                                                                                         | Water and Japanese tea        | 6 L/day                  | 123 | - | IV Ringer's lactate solution, IV diazepam, IV phenytoin, azulene gargling                                                      | Rhabdomyolysis | Recovery - patient regained consciousness after IV infusion. She began drinking large amounts of water to ease throat inflammation which caused her serum Na to drop again. After she started azulene gargling for throat discomfort, her water intake reduced and serum Na normalised                                                                                                                                                                                                     |  |
| 177 | Speedy et al 2000    | New Zealand | Case reports  | 2 | 35 | F | 2 female ultradistance triathletes participated in a study investigating electrolyte changes in the Ironman triathlon. They both drank excessive volumes of fluid and developed mild hyponatraemia as a result                                                                                                                                                                                                                                                                                                 | Unspecified                                                                                           | Acute       | Lightheadedness, swollen body, tight skin                                                                                                          | Water, Powerade and coca-cola | 9.5 L/12.6 hrs           | 131 | - | -                                                                                                                              | -              | Recovery - patients didn't seek treatment, and their serum normalised by the next morning (141 mmol/L)                                                                                                                                                                                                                                                                                                                                                                                     |  |
| 178 | Shevitz et al. 1980  | USA         | Case report   | 1 | 43 | F | Patient was admitted to hospital in a coma. She had been living with her mother since the breakup of an unhappy marriage 20 yrs prior. She had 2 prior psychiatric hospitalisations for toxic delirium and multiple drug abuse, as well as a history of essential hypertension and schizophrenia. She developed psychogenic polydipsia and delusional thoughts, believing that she was the only patient in hospital who was being treated cruelly and not able to drink as much water as she wanted            | Unspecified                                                                                           | Unspecified | Hypotension, respiratory failure, right upper lobe pneumonia, acute renal failure, suspicious, uncooperative, fainting episodes, grand mal seizure | Water                         | 15 quarts/day            | 114 | - | Respirator, broad spectrum antibiotic, fluid restriction, thioridazine (50 mg every 8 hrs), propranolol, prazosin, hydralazine | -              | Ongoing - patient's mood and symptoms improved markedly after treatment with propranolol. She transitioned into ad libitum water intake and her electrolytes normalised. However, after she was discharged she failed to attend outpatient appointments and became noncompliant with medication. She was later found to be ataxic and brought back to emergency where it was discovered that she still suffered from excessive thirst and drinking. She refused more psychiatric follow-up |  |
| 179 | Tolan et al. 2001    | Australia   | Case report 1 | 1 | 41 | F | Patient was admitted with seizures secondary to severe hyponatraemia. She had a history of paranoid                                                                                                                                                                                                                                                                                                                                                                                                            | Olanzapine (10 mg/day), sertraline (50 mg/day)                                                        | Unspecified | Seizures, loss of consciousness                                                                                                                    | Water                         | 10 glasses/day           | 104 | - | Intubation, artificial ventilation,                                                                                            | Rhabdomyolysis | Recovery - patient's serum Na normalised over 48 hrs                                                                                                                                                                                                                                                                                                                                                                                                                                       |  |

|     |                            |           |                    |   |    |   |                                                                                                                                                                                                                                                                                                                                                                                                                                                                                                                                                                                                                                                 |                                                              |                                            |                                                                                     |       |                                      |     |   |                                                                                                           |                              |                                                                                                                                                                                                                                                                                                                                                                                                                                                                                                                                                     |
|-----|----------------------------|-----------|--------------------|---|----|---|-------------------------------------------------------------------------------------------------------------------------------------------------------------------------------------------------------------------------------------------------------------------------------------------------------------------------------------------------------------------------------------------------------------------------------------------------------------------------------------------------------------------------------------------------------------------------------------------------------------------------------------------------|--------------------------------------------------------------|--------------------------------------------|-------------------------------------------------------------------------------------|-------|--------------------------------------|-----|---|-----------------------------------------------------------------------------------------------------------|------------------------------|-----------------------------------------------------------------------------------------------------------------------------------------------------------------------------------------------------------------------------------------------------------------------------------------------------------------------------------------------------------------------------------------------------------------------------------------------------------------------------------------------------------------------------------------------------|
|     |                            |           |                    |   |    |   | schizophrenia. A few weeks before admission, she had begun receiving assertive community treatment with a case manager visiting daily. The morning of admission she was found unconscious at home                                                                                                                                                                                                                                                                                                                                                                                                                                               |                                                              |                                            |                                                                                     |       |                                      |     |   | hypertonic saline, diuresis, clozapine                                                                    |                              |                                                                                                                                                                                                                                                                                                                                                                                                                                                                                                                                                     |
| 180 | Tolan et al. 2001          | Australia | Case report 2      | 1 | 44 | F | Patient consumed 3 L of water after drinking alcohol                                                                                                                                                                                                                                                                                                                                                                                                                                                                                                                                                                                            | Unspecified                                                  | Unspecified                                | Stupor                                                                              | Water | 3 L                                  | 115 | - | Unspecified                                                                                               | Rhabdomyolysis               | Unspecified                                                                                                                                                                                                                                                                                                                                                                                                                                                                                                                                         |
| 181 | Penders et al. 2015        | USA       | Case report        | 1 | 49 | M | Patient presented to emergency with altered mental status. He had a history of schizoaffective disorder and had recently increased his fluid intake to 8 L/day. He also had a history of alcohol abuse but had remained alcohol-free for many years                                                                                                                                                                                                                                                                                                                                                                                             | Valproate (2500 mg nightly), ziprasidone (80 mg twice daily) | Acute - waxing and waning over past 2 days | Altered mental status, delirious, confused, agitated, gait and balance difficulties | Water | 8 L/day                              | 101 | - | Fluid restriction, normal saline infusions, haloperidol (1 mg twice daily), clozapine (350 mg/day)        | -                            | Recovery - patient's serum Na normalised within 6 days of hospitalisation. He was transferred to a behavioural health service where he demonstrated cognitive deficits and agitation. He was started on clozapine but this was discontinued after no improvements were seen. His cognitive state began to improve and he was discharged after 10 days on no psychotropic medications. At a 3-month follow-up he remained free of symptoms and did not require any pharmacological treatment                                                         |
| 182 | Olapade-Olaopa et al. 1997 | UK        | Case report 1      | 1 | 64 | M | Patient collapsed in hospital after a bladder-neck incision procedure. He later reported having drunk 7 L of fluid in the 6 hrs postop in an attempt to adhere to medical advice                                                                                                                                                                                                                                                                                                                                                                                                                                                                | Unspecified                                                  | Acute - 6 hrs                              | Collapsed                                                                           | Fluid | 7 L over 6 hrs                       | 116 | - | Unspecified                                                                                               | -                            | Recovery - patient made a full recovery and was discharged after 8 days                                                                                                                                                                                                                                                                                                                                                                                                                                                                             |
| 183 | Olapade-Olaopa et al. 1997 | UK        | Case report 2      | 1 | 59 | M | Patient was admitted with acute urinary retention. He had previously visited his GP with symptoms suggestive of a urinary infection, and was given a course of antibiotics and encouraged to "drink plenty". Shortly after being admitted to hospital he suffered a seizure but was successfully resuscitated. His wife later revealed that he had drunk 15-18 L of fluid 24 hrs before admission                                                                                                                                                                                                                                               | Antibiotics                                                  | Acute - 24 hrs                             | Seizure                                                                             | Fluid | 15-18 L/24 hrs                       | 113 | - | Unspecified                                                                                               | -                            | Recovery - patient made a full recovery and was discharged after 5 days                                                                                                                                                                                                                                                                                                                                                                                                                                                                             |
| 184 | Funayama et al. 2011       | Japan     | Letter/case report | 1 | 58 | M | Patient had a 35-yr history of schizophrenia with 1 hospital admission due to a psychotic episode. He had been treated as an outpatient for 34 yrs                                                                                                                                                                                                                                                                                                                                                                                                                                                                                              | Haloperidol (3 mg/day)                                       | Chronic                                    | Mild disorientation, agitation                                                      | Water | > 10 L/day                           | 100 | - | 0.9% normal saline, fluid restriction                                                                     | Central pontine myelinolysis | Recovery - patient's serum Na normalised over 7 days, but he developed CPM. With treatment, he fully recovered over the next few months and his symptoms reversed. His water intake reduced to 1.5 L/day and he was discharged after 6 months                                                                                                                                                                                                                                                                                                       |
| 185 | Fleischhacker et al. 1987  | Austria   | Case report        | 1 | 47 | F | Patient had a history of paranoid schizophrenia that was treated with neuroleptics. However, in the 8 months prior to admission she had discontinued medication. She had been holidaying in a small village near Innsbruck before admission, and the landlady of the inn she stayed at for over 4 weeks described her behaviour as bizarre. She withdrew from others, spent most of her time in her darkened room praying, only visited the graveyard and church and only ate cereal products, yoghurt and fruit juice. 4 hrs after one of her visits to the graveyard she was found in her room drinking water from the washbasin and vomiting | -                                                            | Acute - 4 hrs                              | Somnolent, grand mal seizures, vomiting, bizarre behaviour                          | Water | "Drinking large quantities of water" | 101 | - | 5% hypertonic saline, furosemide, potassium supplement, doxycycline, dexamethasone, phenytoin, cimetidine | -                            | Recovery - patient had 3 L of clear fluid removed through haemofiltration. She had profuse diuresis and her serum Na normalised within 17 hrs of admission. She regained consciousness after 36 hrs but could not remember anything that had happened between her arrival in Austria to her hospitalisation. She developed symptoms of depersonalisation and thought disturbances 9 days later, and reported that the voice of God had commanded her to drink large amounts of water to cleanse herself. She was discharged 16 days after admission |

|     |                       |           |               |   |    |   |                                                                                                                                                                                                                                                                                                                                                                                                                                                                                                                                                                                     |                                                                                   |               |                                                                                                                |       |                                         |     |   |                                                                              |                |                                                                                                                                                                                                                                                                                                                 |
|-----|-----------------------|-----------|---------------|---|----|---|-------------------------------------------------------------------------------------------------------------------------------------------------------------------------------------------------------------------------------------------------------------------------------------------------------------------------------------------------------------------------------------------------------------------------------------------------------------------------------------------------------------------------------------------------------------------------------------|-----------------------------------------------------------------------------------|---------------|----------------------------------------------------------------------------------------------------------------|-------|-----------------------------------------|-----|---|------------------------------------------------------------------------------|----------------|-----------------------------------------------------------------------------------------------------------------------------------------------------------------------------------------------------------------------------------------------------------------------------------------------------------------|
| 186 | Bayir et al. 2012     | Turkey    | Case report   | 1 | 51 | F | Patient was admitted with altered consciousness and agitation. She complained of severe headaches before loss of consciousness, and went into cardiac arrest during initial examination. She had a history of hypertension, and her family reported that she had consumed several litres of tap water in a short period of time due to emotional stress. She later confirmed that she had consumed 12 L of water in 4 hrs with suicidal intent, and was diagnosed with major depression                                                                                             | Olmesartan (20 mg/day)                                                            | Acute - 4 hrs | Confused, disoriented, altered consciousness, agitated, headaches, cardiovascular arrest, tonic-clonic seizure | Water | 12 L in 4 hrs                           | 107 | - | Intubation, IV magnesium, 3% NaCl, KCl, IV diazepam (10 mg), antidepressants | -              | Recovery - patient's serum Na normalised and she was discharged with antidepressants                                                                                                                                                                                                                            |
| 187 | Weiss 2004            | USA       | Case report   | 1 | 71 | F | Patient had a history of hypertension, hyperlipidaemia and right eye cataract. She reported to a clinic for evaluation before cataract extraction where hyponatraemia was detected. She reported drinking up to 8 L of water/day for years, that it "felt good" to drink cold water and that it helped with her dry throat                                                                                                                                                                                                                                                          | Labetolol, nifedipine, fosinopril, hydrochlorothiazide (12.5 mg/day), pravastatin | Chronic       | Weak, dizzy                                                                                                    | Water | 8 L/day                                 | 116 | - | Normal saline, fluid restriction (1 L/day), fosinopril (20 mg)               | -              | Recovery - patient recovered and was discharged home on fosinopril (40 mg), aspirin, pravastatin and nifedipine. Cataract surgery was performed 2 weeks later and her serum Na at the time was normal (136 mmol/L). Over the next month, she had no further problems with medication compliance or fluid intake |
| 188 | Diamond et al. 2003   | USA       | Case report   | 1 | 43 | M | Patient had no prior medical history. He had recently smoked marijuana and took 20 capsules of the herbal, uva ursi (hydroquinone) with 5 gallons of water in preparation for a pre-employment drug screen. Several hrs later he was transferred to hospital for hyponatraemia                                                                                                                                                                                                                                                                                                      | Marijuana, uva ursi (hydroquinone, ursolic acid, isoquercetin, arbutin)           | Acute - hrs   | Combative, confused, lip smacking, "foaming at the mouth", lethargic                                           | Water | 5 gallons over a few hrs                | 114 | - | 3% saline                                                                    | Rhabdomyolysis | Recovery - patient's serum Na improved over 48 hrs and he had a huge diuresis of > 9 L. He was discharged after 6 days                                                                                                                                                                                          |
| 189 | Su et al. 2012        | Australia | Case report   | 1 | 82 | M | Patient had a history of TURP, AF, hypertension and depression and was reviewed for ongoing chronic lower urinary tract symptoms. While preparing for a urine flow study, he drank 3 L of water in 4 hrs. Hrs later, his family noticed he was having difficulty speaking and becoming confused                                                                                                                                                                                                                                                                                     | Mirtazapine, ramipril                                                             | Acute - 4 hrs | Confusion, difficulty finding words                                                                            | Water | 3 L over 4 hrs                          | 114 | - | Fluid restriction (800 mL/day)                                               | -              | Ongoing - patient was discharged with a serum Na level of 127 mmol/L                                                                                                                                                                                                                                            |
| 190 | Leban et al. 2016     | Slovenia  | Case report   | 1 | 44 | F | Patient had no previous medical history. She was admitted after attending a purification and detoxification ritual called "Amazonia" which was organised by a South American shaman. The shaman burned her shoulder 5 times with a burning stick, and applied dried skin secretion from a giant leaf frog to the wounds. She began feeling dizzy and started drinking the recommended 4 L of water. 3 hrs later she developed symptoms of hyponatraemia, drank more water and called her husband for help. She developed SIADH which was exacerbated by excessive water consumption | Unspecified                                                                       | Acute - 9 hrs | Dizziness, confusion, vomiting, weakness, nausea, muscle cramps, shivering, delusional, grand mal seizure      | Water | 6 L over 9 hrs                          | 116 | - | 0.9% sodium chloride, water restriction                                      | Rhabdomyolysis | Recovery - 12-24 hrs after venom exposure, she was somnolent, confused and agitated, and had painful muscle spasms. The next day she regained consciousness, and her serum Na normalised after 48 hrs. Rhabdomyolysis got worse, but began to recover by the 3rd day                                            |
| 191 | Kawashima et al. 2015 | Japan     | Case report 1 | 1 | 22 | M | Patient was found dead in his room. He had an intellectual disability and had been seen drinking considerable volumes of water and vomiting 10 days before his death                                                                                                                                                                                                                                                                                                                                                                                                                | Unspecified                                                                       | Chronic       | Vomiting                                                                                                       | Water | "Repeatedly drunk considerable amounts" | 108 | - | -                                                                            | -              | Death - autopsy revealed a congested brain weighing 1540 g, heart weighing 415 g, lungs weighing 670 g (left) and 750 g (right) and swelling and red-coloured fluid in the trachea and bronchi. The bladder was distended and contained 910 cc of urine. Lung                                                   |



|     |                       |           |               |   |             |             |                                                                                                                                                                                                                                                                                                                                                                                                         |                                                                                                                           |                  |                                                                                                         |                                |                                           |       |   |                                                                                                                                             |   |                                                            |                                                                                                                                                                                                                                                                                                                                                                                 |
|-----|-----------------------|-----------|---------------|---|-------------|-------------|---------------------------------------------------------------------------------------------------------------------------------------------------------------------------------------------------------------------------------------------------------------------------------------------------------------------------------------------------------------------------------------------------------|---------------------------------------------------------------------------------------------------------------------------|------------------|---------------------------------------------------------------------------------------------------------|--------------------------------|-------------------------------------------|-------|---|---------------------------------------------------------------------------------------------------------------------------------------------|---|------------------------------------------------------------|---------------------------------------------------------------------------------------------------------------------------------------------------------------------------------------------------------------------------------------------------------------------------------------------------------------------------------------------------------------------------------|
|     |                       |           |               |   |             |             |                                                                                                                                                                                                                                                                                                                                                                                                         |                                                                                                                           |                  |                                                                                                         |                                |                                           |       |   |                                                                                                                                             |   | tissue was significantly congested with presence of oedema |                                                                                                                                                                                                                                                                                                                                                                                 |
| 192 | Kawashima et al. 2015 | Japan     | Case report 2 | 1 | 23          | M           | Patient with an intellectual disability had a sudden fall and was found unconscious. He suffered from polydipsia and repeatedly drunk large volumes of water. His polydipsia was uncontrollable so his family had him admitted into an institution. He day following his admission, he was found unconscious and died despite transport to emergency                                                    | Antipsychotic medication                                                                                                  | Chronic          | Diarrhoea, vomiting                                                                                     | Water                          | "Repeatedly drunk considerable amounts"   | < 100 | - | -                                                                                                                                           | - | -                                                          | Death - autopsy revealed a congested brain weighing 1383 g, heart weighing 328 g, and swollen lungs weighing 422 g (left) and 509 g (right). Intraperitoneal space contained 3100 cc of fluid. Oedema of the subarachnoid space was observed as well as protruded cardiac vessels and fluid in the bronchi                                                                      |
| 193 | Kruse 1993            | USA       | Case report   | 1 | 54          | M           | Patient presented to emergency with hiccups He reported having tried "holding his breath and sugar on his tongue" but nothing helped to stop the hiccups. He had a medical history of hypertension, diabetes and a psychiatric disorder that he couldn't name. He also had a history of psychogenic polydipsia and the hiccups were caused by diaphragmatic seizures induced by his low serum Na levels | Lithium, chlorpromazine, benzotropine mesylate                                                                            | Unspecified      | Hiccups, fatigue, agitation                                                                             | Water                          | "Walked frequently to the water fountain" | 124   | - | Unspecified                                                                                                                                 | - | -                                                          | Unspecified                                                                                                                                                                                                                                                                                                                                                                     |
| 194 | Cosgray et al. 1993   | USA       | Cohort study  | 9 | 38          | Unspecified | 9 patients in a state hospital were placed into a special water intoxication program and monitored. They all had a history of schizophrenia and smoking. All patients had experienced hyponatraemia due to excessive water intake                                                                                                                                                                       | Haldol, mellaril, proloxin, navane, thiorazine                                                                            | Unspecified      | Unspecified                                                                                             | Water                          | "Excessive water intake"                  | 124   | - | Fluid restriction (3 L/day), behavioural therapy (water fountains turned off, bathrooms supervised, weight and electrolytes monitored)      | - | -                                                          | Recovery - all patients' electrolytes were within normal ranges, and fluid intake was well controlled                                                                                                                                                                                                                                                                           |
| 195 | Cortejoso et al. 2014 | Spain     | Case report   | 1 | 61          | M           | Patient presented to emergency semi-conscious with repetitive language and short-term memory loss. He had a history of type II diabetes, hypertension and a left foot ulcer                                                                                                                                                                                                                             | Metformin, indapamide                                                                                                     | Chronic - 3 days | Semi-consciousness, repetitive language, short-term memory loss, depressive symptoms, lower limb oedema | Water                          | "High water intake for 3 days"            | 123   | - | Fluid restriction, acyclovir, enoxaparin, amlodipine, insulin, metoclopramide, acetaminophen, acetylsalicylic acid, atorvastatin, enalapril | - | -                                                          | Recovery - after treatment with acyclovir was discontinued, sodium Na began to increase. Patient eventually recovered and was discharged after 6 days                                                                                                                                                                                                                           |
| 196 | Thomas et al. 2001    | USA       | Case report   | 1 | 48          | M           | Patient had a 21-yr history of intractable hiccups and had previously been admitted 4 times for hyponatraemia. He had a history of gastritis, hypocalcaemia, hypertension, pancreatitis and CPM. He reported drinking excessive amounts of water in order to prevent hiccups                                                                                                                            | Propranolol (20 mg twice daily), clonidine (0.1 mg twice daily), chlorpromazine (50 mg), benadryl (50 mg), pepcid (20 mg) | Chronic          | Nausea, vomiting, epigastric pain, weight loss over 6 months, seizures, anxiety, irritability, euthymia | Water                          | 10 L/day                                  | 105   | - | Behavioural treatment                                                                                                                       | - | -                                                          | Recovery - patient was unable to restrict his fluid consumption previously, so was started on outpatient behavioural treatment. Over the 8-week treatment, he had weekly individual and family sessions where he was given education on causes of hiccups and consequences of excessive water intake. Since then, the patient has not had any further episodes of hyponatraemia |
| 197 | Scotney et al. 2015   | Australia | Case report   | 1 | Unspecified | Unspecified | Patient was a moderately experienced runner who participated in the Cradle Mountain Run. Patient completed the event in 11 hrs and 24 minutes                                                                                                                                                                                                                                                           | Diclofenac (150 mg)                                                                                                       | Asymptomatic     | Asymptomatic                                                                                            | Water and electrolyte solution | 5.3 L/11 hrs                              | 132   | - | Unspecified                                                                                                                                 | - | -                                                          | Unspecified                                                                                                                                                                                                                                                                                                                                                                     |
| 198 | Nixon et al. 1982     | USA       | Case report   | 1 | 24          | F           | Patient had a history of 15 psychiatric admissions since she was 14 and had been hospitalised for 3 yrs with schizophrenia. She had experienced various episodes of hyponatraemia throughout the years. During 3 separate                                                                                                                                                                               | Haloperidol, benzotropine                                                                                                 | Chronic          | Seizures, postictal coma, vomiting                                                                      | Fluids                         | 15-20 L/day                               | 115   | - | Demeclocycline (1200 mg)                                                                                                                    | - | -                                                          | Recovery - treatment was effective in reducing patient's hyponatraemia                                                                                                                                                                                                                                                                                                          |

|     |                     |           |                            |    |    |           |                                                                                                                                                                                                                                                                                                                                                                                                                                                                                                                                                        |                                                                                        |               |                                                                                                                                                    |        |                                               |     |   |                                                                                                           |                                                |                                                                                                                                                                                                                                                                                                                                                                                                                                                                        |  |
|-----|---------------------|-----------|----------------------------|----|----|-----------|--------------------------------------------------------------------------------------------------------------------------------------------------------------------------------------------------------------------------------------------------------------------------------------------------------------------------------------------------------------------------------------------------------------------------------------------------------------------------------------------------------------------------------------------------------|----------------------------------------------------------------------------------------|---------------|----------------------------------------------------------------------------------------------------------------------------------------------------|--------|-----------------------------------------------|-----|---|-----------------------------------------------------------------------------------------------------------|------------------------------------------------|------------------------------------------------------------------------------------------------------------------------------------------------------------------------------------------------------------------------------------------------------------------------------------------------------------------------------------------------------------------------------------------------------------------------------------------------------------------------|--|
|     |                     |           |                            |    |    |           | episodes she set herself on fire and incurred severe burns                                                                                                                                                                                                                                                                                                                                                                                                                                                                                             |                                                                                        |               |                                                                                                                                                    |        |                                               |     |   |                                                                                                           |                                                |                                                                                                                                                                                                                                                                                                                                                                                                                                                                        |  |
| 199 | Chong et al. 1997   | Singapore | Retrospective cohort study | 14 | 49 | 10 M, 4 F | Patients were inpatients at a mental hospital and all had a history of schizophrenia. All patients had experienced hyponatraemia related to excessive water drinking. 2 patients had a history of diabetes mellitus. Reasons for excessive fluid intake included thirst, pleasure, auditory hallucination commands and hunger                                                                                                                                                                                                                          | Chlorpromazine, lithium, carbamazepine, tolbutamide, tricyclic antidepressant          | Unspecified   | Unspecified                                                                                                                                        | Fluids | "Excessive amounts"                           | 125 | - | Unspecified                                                                                               | -                                              | Unspecified                                                                                                                                                                                                                                                                                                                                                                                                                                                            |  |
| 200 | Goldman 1999        | USA       | Case report                | 1  | 39 | M         | Patient had a 19-yr history of schizophrenia and had been hospitalised for over 7 yrs during which time he suffered various episodes of hyponatraemia. He was trialled on different types of treatments                                                                                                                                                                                                                                                                                                                                                | Clozapine, trifluoperazine, phenytoin, valproic acid, benzotropine                     | Chronic       | Delirium, seizures, aggression, thought disorder                                                                                                   | Fluids | 9-15 L/day                                    | 115 | - | Cortisol                                                                                                  | -                                              | Ongoing - serum Na appeared to rise slightly during cortisol treatment, but the result was not significant and serum Na did not normalise over the course of treatment                                                                                                                                                                                                                                                                                                 |  |
| 201 | Moskowitz 1992      | USA       | Case report                | 1  | 42 | F         | Patient had a history of schizophrenia and polydipsia, and had been hospitalised many times throughout the years. She presented to emergency with hyponatraemia. 7 years before the current admission, she jumped out of a car on a highway, and the following year was treated for a self-inflicted stab wound to the epigastrium                                                                                                                                                                                                                     | Haloperidol (5 mg), benzotropine mesylate (2 mg)                                       | Chronic       | Collapsed, agitated, thrashing about in bed, unresponsive                                                                                          | Fluids | 7 L/day                                       | 115 | - | Foley catheter, 0.9% IV sodium chloride, water restriction                                                | Rhabdomyolysis, nephrogenic diabetes insipidus | Ongoing - 3 L of urine was drained within 1 hr of admission. 7 hrs after admission, the patient's serum Na had normalised. However, after the Foley catheter was removed and she was given free access to cigarettes and water, she relapsed. Subsequent treatment helped to bring her serum Na back up, and she was discharged with an indwelling Foley catheter that was removed 2 months later. Follow-ups over the next 66 months revealed recurrent hyponatraemia |  |
| 202 | Simmons et al. 2007 | USA       | Case report                | 1  | 68 | F         | Patient presented to emergency with a change in mental status and abdominal pain. Her husband reported that she had been confused for 3 days prior to admission, but only in the evenings. She had experienced a syncopal episode with urinary incontinence the night before admission and had suffered from abdominal pain and distension for a week. She had a history of hypertension, epilepsy, depression, melanoma and colon cancer. She believed she had gastroenteritis and could "flush out" the infection by drinking large amounts of water | Sertraline, divalproex, lamotrigine, zonisamide, amlodipine, atorvastatin              | Chronic       | Altered mental status, abdominal pain, confusion                                                                                                   | Water  | 2-3 gallons/day + 2 L over 3 hrs in emergency | 118 | - | Fluid restriction (2 L/day)                                                                               | -                                              | Recovery - patient's serum Na normalised and her mental status normalised. She was able to get an appendectomy for acute appendicitis discovered in emergency, and was discharged after 6 days in hospital                                                                                                                                                                                                                                                             |  |
| 203 | Lipsky et al. 1987  | USA       | Letter/case report         | 1  | 64 | F         | Patient was admitted with severe lower back pain, and had a history of thyroid disease. In preparation for a pelvic ultrasonography, she drank 1350 mL of water over 1-2 hrs and subsequently developed symptoms of hyponatraemia                                                                                                                                                                                                                                                                                                                      | Carisoprodol, aspirin, ibuprofen, oxycodone, acetaminophen, L-thyroxine, dexamethasone | Acute - 2 hrs | Severe weakness, disoriented, aphasic                                                                                                              | Water  | 1350 mL over 1-2 hrs                          | 123 | - | 3% saline infusion, 5% glucose in normal saline                                                           | -                                              | Recovery - patient's serum Na normalised after 14 hrs                                                                                                                                                                                                                                                                                                                                                                                                                  |  |
| 204 | Looi et al. 1995    | Australia | Case report                | 1  | 43 | M         | Patient presented with anxiety and depressive symptoms. He had a history of multiple admissions for schizoaffective disorder and experienced auditory hallucinations telling him to commit suicide. He was also a smoker and suffered from chronic airflow limitation. Patient reported drinking excessive amounts of water out of habit rather than thirst. On                                                                                                                                                                                        | Clonazepam, lithium carbonate, nocte, chlorpromazine                                   | Chronic       | Low mood, weight loss, decreased appetite, concentration difficulties, slurred speech, disorientated, unsteady, tremulous, twitching feet, seizure | Water  | 4 glasses/hr or 16 L/day                      | 120 | - | Water restriction (1 glass/hr), IV normal saline, all psychotropic medications discontinued, IV midazolam | -                                              | Recovery - patient recovered and was discharged after 13 days in hospital on clonazepam alone                                                                                                                                                                                                                                                                                                                                                                          |  |

|     |                        |              |                    |   |             |   |                                                                                                                                                                                                                                                                                                                                                                                                                                                                               |                                          |                |                                                  |        |                                                                 |     |   |                                                                                                                              |                              |                                                                                                                                                                                                                                                                                                                                                                                                      |
|-----|------------------------|--------------|--------------------|---|-------------|---|-------------------------------------------------------------------------------------------------------------------------------------------------------------------------------------------------------------------------------------------------------------------------------------------------------------------------------------------------------------------------------------------------------------------------------------------------------------------------------|------------------------------------------|----------------|--------------------------------------------------|--------|-----------------------------------------------------------------|-----|---|------------------------------------------------------------------------------------------------------------------------------|------------------------------|------------------------------------------------------------------------------------------------------------------------------------------------------------------------------------------------------------------------------------------------------------------------------------------------------------------------------------------------------------------------------------------------------|
|     |                        |              |                    |   |             |   | the 3rd day, he was diagnosed with diabetes insipidus                                                                                                                                                                                                                                                                                                                                                                                                                         |                                          |                |                                                  |        |                                                                 |     |   |                                                                                                                              |                              |                                                                                                                                                                                                                                                                                                                                                                                                      |
| 205 | Shiwach 1996           | USA          | Letter/case report | 1 | 88          | F | Patient was admitted with sudden onset acute confusion. Her family reported that she went to the bathroom to irrigate her colostomy bag, but emerged 2 hrs later talking gibberish and unable to identify any of her family members. She had a history of rectal carcinoma, peptic ulcer, breast cancer and gallstones. She later revealed that she had been having some trouble with her bowels and when 1 L of water didn't get her any results, she overirrigated with 4 L | Unspecified                              | Acute - 2 hrs  | Confusion, disorientation, poor attention        | Water  | 4 L/2 hrs                                                       | 118 | - | Hypertonic saline infusion                                                                                                   | -                            | Recovery - patient's serum Na normalised and she was discharged after 2 days                                                                                                                                                                                                                                                                                                                         |
| 206 | Whitchurch et al. 2011 | Australia    | Letter/case report | 1 | 42          | F | Patient was an accountant with a long history of bipolar affective disorder. She presented to hospital with a psychotic manic relapse due to work stress and non-compliance with medication. Her family reported that she increased her intake of water since the onset of psychosis                                                                                                                                                                                          | Unspecified                              | Unspecified    | Paranoid delusions, increased pressure of speech | Water  | Several litres/day                                              | 123 | - | Olanzapine, lorazepam, fluid restriction (2 L/day), oral sodium chloride tablets                                             | -                            | Recovery - patient's serum Na normalised after 8 days (137 mmol/L), her psychosis abated significantly and she was transferred to a psychiatric unit. She was discharged a week later and showed continued improvement at an 8-month follow-up                                                                                                                                                       |
| 207 | Wicke et al. 2017      | Germany      | Case report        | 1 | 44          | F | Patient was admitted to ICU with impaired consciousness and confusion. Her relatives reported that she may have taken medication in a suicide attempt. She had a history of major depressive disorder, and possibly psychogenic polydipsia                                                                                                                                                                                                                                    | Venlafaxine, ibuprofen, opipramole       | Unspecified    | Impaired consciousness, confusion                | Water  | "In a hyperhydrated state likely due to psychogenic polydipsia" | 102 | - | Saline solutions                                                                                                             | Central pontine myelinolysis | Recovery - upon admission, patient had a spontaneous diuresis of 3 L of urine/day so it was assumed that she was in a hyperhydrated state. Patient's serum Na normalised after 10 days, but she developed CPM. She was subsequently transferred to a specialised rehabilitation clinic, and at a 4-month follow-up she was able to walk on her own and perform most activities of daily living again |
| 208 | Noakes et al. 2001     | South Africa | Case report        | 1 | Unspecified | M | Patient was admitted to hospital with severe symptomatic hyponatraemia following the Comrades Marathon. He reported drinking around 1500 mL/hr during the 10 hrs and 28 minutes that he took to run the race. Once the race ended, he became confused and was admitted to hospital semi-comatose                                                                                                                                                                              | Unspecified                              | Acute - 10 hrs | Confusion, semi-comatose                         | Fluids | 15 L over 10 hrs                                                | 123 | - | Furosemide, IV infusion of normal saline                                                                                     | -                            | Recovery - patient passed 6.1 L of urine in 36 hrs and his serum Na normalised to 141 mmol/L. He returned to work within a week of discharge                                                                                                                                                                                                                                                         |
| 209 | Kathol et al. 1985     | USA          | Case report 1      | 1 | 31          | M | Patient had a history of chronic disorganised schizophrenia and had auditory hallucinations and thought disorder for many years. He consumed up to 10 L of water/day and had been doing this for around 7 years. Upon admission, his water intake was around 8 L/day. As a result of his excessive fluid intake, he developed megalocystis with renal insufficiency secondary to urinary reflux                                                                               | Unspecified                              | Chronic        | Unspecified                                      | Water  | 8 L/day                                                         | 125 | - | Propranolol (160 mg/day), molindone HCL                                                                                      | -                            | Recovery - patient's water intake decreased to 1.5 L/day on propranolol and his serum Na normalised over time. He was transferred back to his psychiatric facility and a 12-month follow-up revealed maintenance of water intake and serum Na levels                                                                                                                                                 |
| 210 | Kathol et al. 1985     | USA          | Case report 2      | 1 | 42          | M | Patient had a history of organic mental disorder with an IQ of 75, seizure disorder and auditory and visual hallucinations. He had suffered a skull fracture at 12-months of age and developed a large left parietal leptomenigeal cyst. During the past 3 yrs of chronic institutionalisation, he was noted to drink excessive                                                                                                                                               | Anticonvulsants, thiothixene (30 mg/day) | Chronic        | Seizures, hallucinations, dereistic thinking     | Water  | 18 L/day                                                        | 123 | - | Thiothixene discontinued, propranolol (480 mg/day), captopril (150 mg/day), haloperidol (170 mg/day), phenytoin (700 mg/day) | -                            | Ongoing - treatment with propranolol and haloperidol were unsuccessful. Treatment with captopril caused the patient's water intake to increase to 30 L/day. Patient was transferred back to his psychiatric facility with no improvement on phenytoin and primidone. Antipsychotic medications were discontinued as they didn't improve his symptoms. A 12-month                                     |

|     |                    |             |                     |   |    |          |                                                                                                                                                                                                                                                                                                                                                                                                                              |                                                                                                        |                        |                                                    |       |                             |     |   |                                                                                                                                     |                |                                                                                                                                                                                                                                                                                                                                                                                                                                                         |
|-----|--------------------|-------------|---------------------|---|----|----------|------------------------------------------------------------------------------------------------------------------------------------------------------------------------------------------------------------------------------------------------------------------------------------------------------------------------------------------------------------------------------------------------------------------------------|--------------------------------------------------------------------------------------------------------|------------------------|----------------------------------------------------|-------|-----------------------------|-----|---|-------------------------------------------------------------------------------------------------------------------------------------|----------------|---------------------------------------------------------------------------------------------------------------------------------------------------------------------------------------------------------------------------------------------------------------------------------------------------------------------------------------------------------------------------------------------------------------------------------------------------------|
|     |                    |             |                     |   |    |          | amounts of water and developed chronic hyponatraemia as a result                                                                                                                                                                                                                                                                                                                                                             |                                                                                                        |                        |                                                    |       |                             |     |   | primidone (1750 mg/day)                                                                                                             |                | follow-up revealed that the patient was still consuming 17 L of water/day and maintaining a serum Na level of 125 mmol/L                                                                                                                                                                                                                                                                                                                                |
| 211 | Kathol et al. 1985 | USA         | Case report 3       | 1 | 56 | M        | Patient had a history of chronic disorganised schizophrenia and excessive water consumption (> 8 L/day). He would drink from toilets and urinals if left unattended but denied his excessive drinking behaviours. He also had a history of hypertension                                                                                                                                                                      | Propranolol (240 mg/day then 320 mg/day)                                                               | Chronic                | Seizures                                           | Fluid | > 8 L/day                   | 120 | - | Propranolol, demeclocycline (1200 mg), thiothixene (40 mg/day), locking patient in bedroom at night                                 | -              | Ongoing - increasing dosage of propranolol and administering demeclocycline were both unsuccessful in treating the patient's polydipsia. Thiothixene did help to improve the patient's mental status temporarily. Behavioural therapy was trialled by locking patient in his bedroom at night, but this proved to be impractical. A 1-yr follow-up revealed that the patient still drank 8 L of water/day and maintained a serum Na level of 125 mmol/L |
| 212 | Lyster et al. 1994 | USA         | Letter/case reports | 4 | 48 | 3 M, 1 F | A retrospective chart review was conducted to identify patients with a history of excessive water drinking and clozapine treatment. All 4 patients had a history of schizophrenia and had been treated with various antipsychotics throughout the years. They all had polydipsia and 3 of the patients had experienced intermittent hyponatraemia                                                                            | Chlorpromazine                                                                                         | Unspecified            | Unspecified                                        | Water | "Excessive water intake"    | 119 | - | Clozapine                                                                                                                           | -              | Recovery - patients' excessive water intake decreased significantly on clozapine. Only 1 patient still displayed some problems with excessive drinking, however was much improved compared to baseline                                                                                                                                                                                                                                                  |
| 213 | Worthley 1975      | Australia   | Case report         | 1 | 67 | F        | Patient was admitted for removal of a fissure-in-ano and had been in good health previously. She had a history of smoking (40 cigarettes/day) which was disallowed following surgery. On the 5th post-operative day, it was observed that she had begun drinking excessive amounts of water. She later obtained a packet of cigarettes and smoked 10 within 3 hrs, before being stopped. She recommenced drinking afterwards | Halothane anaesthesia                                                                                  | Acute - 24 hrs         | Vomiting, loss of consciousness, grand mal seizure | Water | "Excessive amounts"         | 97  | - | IV diazepam (30 mg), frusemide (120 mg), hypertonic saline                                                                          | -              | Recovery - patient's serum Na normalised after a few days. A water load conducted 3 days later showed that she responded normally to water ingestion in the absence of nicotine                                                                                                                                                                                                                                                                         |
| 214 | Dubin et al. 2016  | Israel      | Case report         | 1 | 58 | M        | Patient had a 6-yr history of hypertension and dyslipidaemia, as well as a 32-yr history of schizophrenia. He was confused and agitated following excessive water intake and had been living in a hostel at time of admission. 5 yrs ago he had been admitted with generalised convulsions due to hyponatraemia                                                                                                              | Lercanidipine, atorvastatin (10 mg/day), zuclopenthixol (200 mg every 2 weeks), olanzapine (15 mg/day) | Chronic                | Confused, agitated                                 | Water | "Excessive water drinking"  | 110 | - | Hypertonic saline                                                                                                                   | Rhabdomyolysis | Recovery - patient's serum Na normalised within 48 hrs of treatment (136 mmol/L), however on the 4th day he developed burning pain, warmth and erythema in both legs. The following day, he developed severe pain, paraesthesiae, non-pitting edema and muscle weakness. He was monitored closely and gradually recovered over time. Upon recovery, he was transferred to a rehabilitation centre and began using bilateral corrective bracing          |
| 215 | Wicki et al. 1998  | Switzerland | Case report         | 1 | 42 | M        | Patient had a history of paranoid schizophrenia and was admitted for an inaugural generalised seizure. He reported several days of excess water consumption before admission                                                                                                                                                                                                                                                 | Clozapine (300 mg/day), chloral hydrate (250 mg)                                                       | Chronic - several days | Seizure, drowsy, anxious, visual hallucinations    | Water | "Compulsive water drinking" | 120 | - | Diazepam (5 mg), haloperidol (2 mg), desmopressin acetate, hyperosmolar sodium solution (240 mmol/L), clozapine restarted on day 10 | -              | Recovery - patient excreted 6 L of urine within 9 hrs of admission. His serum Na normalised after 13 hrs (140 mmol/L) and he was discharged after 19 days in hospital                                                                                                                                                                                                                                                                                   |
| 216 | Zaidi 2005         | USA         | Case report         | 1 | 50 | M        | Patient had a history of paranoid schizophrenia and psychogenic polydipsia and was seen for increasing restlessness and acute behavioural changes. He had                                                                                                                                                                                                                                                                    | Ziprasidone (40 mg twice daily)                                                                        | Chronic - 3 days       | Restless, behavioural changes, seizures            | Water | "Excessive water drinking"  | 112 | - | Haloperidol (2 mg 3 times daily), 0.9% normal saline, 3% NaCl solution, water                                                       | Rhabdomyolysis | Recovery - patient excreted 6 L of urine within 12 hrs. After ziprasidone was withheld, his auditory hallucinations worsened. On day 3, the patient was found missing from the                                                                                                                                                                                                                                                                          |

|     |                       |        |                                  |    |             |          |                                                                                                                                                                                                                                                                                                                                                                                                                                                                                                                                                                                                                              |                              |                    |                                                                                |                                 |                            |     |                                                                    |                                                                    |                                                                                                                                                                                                                                                              |                                                                                                                                                                                                                                      |
|-----|-----------------------|--------|----------------------------------|----|-------------|----------|------------------------------------------------------------------------------------------------------------------------------------------------------------------------------------------------------------------------------------------------------------------------------------------------------------------------------------------------------------------------------------------------------------------------------------------------------------------------------------------------------------------------------------------------------------------------------------------------------------------------------|------------------------------|--------------------|--------------------------------------------------------------------------------|---------------------------------|----------------------------|-----|--------------------------------------------------------------------|--------------------------------------------------------------------|--------------------------------------------------------------------------------------------------------------------------------------------------------------------------------------------------------------------------------------------------------------|--------------------------------------------------------------------------------------------------------------------------------------------------------------------------------------------------------------------------------------|
|     |                       |        |                                  |    |             |          | been residing in a long-term psychiatric facility and had been trialled on haloperidol, risperidone and olanzapine to no effect. He smoked 1/2 a pack of cigarettes/day for several yrs. 3 days before admission, he refused his medication and began drinking water excessively                                                                                                                                                                                                                                                                                                                                             |                              |                    |                                                                                |                                 |                            |     | restriction (< 1 L/day), ziprasidone restarted (80 mg twice daily) |                                                                    | ward and had reportedly drunk several cans of soda from a vending machine. Once ziprasidone was restarted, he showed improvements in mental status. He was transferred back to his psychiatry facility after 8 days with normal serum Na values (141 mmol/L) |                                                                                                                                                                                                                                      |
| 217 | Allon et al. 1990     | USA    | Case report 1                    | 1  | 53          | F        | Patient had a history of schizophrenia and was admitted to hospital with worsening psychosis. While in hospital, it was noted that she drank excessive amounts of water and ate cigarette butts from ash trays. On the 6th days, she had a grand mal seizure                                                                                                                                                                                                                                                                                                                                                                 | Loxapine                     | Chronic - 6 days   | Grand mal seizure                                                              | Water                           | "Drank water excessively"  | 112 | -                                                                  | Loxapine discontinued, fluid restriction, loxapine restarted       | -                                                                                                                                                                                                                                                            | Recovery - patient's serum Na normalised after a days and loxapine was restarted. She was observed for 6 days and during that time her serum Na remained normal                                                                      |
| 218 | Allon et al. 1990     | USA    | Case report 2                    | 1  | 39          | M        | Patient had a history of schizophrenia and presented to hospital following a grand mal seizure. He was a compulsive water drinker and heavy smoker                                                                                                                                                                                                                                                                                                                                                                                                                                                                           | Unspecified                  | Unspecified        | Grand mal seizure                                                              | Water                           | "Compulsive water drinker" | 106 | -                                                                  | Fluid restriction                                                  | -                                                                                                                                                                                                                                                            | Recovery - patient's serum Na normalised within a few days                                                                                                                                                                           |
| 219 | Ripley et al. 1989    | Canada | Retrospective case-control study | 17 | Unspecified | M        | 17 patients were identified from a population of long-stay patients in a psychiatric hospital as having experienced self-induced water intoxication and hyponatraemia. All patients had a history of schizophrenia and no other notable illnesses. Another 17 patients had no history of polydipsia and were selected as a control group. 9 of the water intoxicated patients had a history of alcohol abuse                                                                                                                                                                                                                 | Unspecified                  | Unspecified        | Seizures (9), incoordination, ataxia, confusion, disinhibition                 | Water                           | 5-10 L/day                 | 120 | -                                                                  | Unspecified                                                        | -                                                                                                                                                                                                                                                            | Unspecified                                                                                                                                                                                                                          |
| 220 | Armstrong et al. 1993 | USA    | Case report                      | 1  | 21          | M        | A previously healthy patient participated in a research study that investigated the effects of dietary sodium restriction on heat acclimation and physical performance. For the purposes of the study, he lived for 17.5 days in a research facility that housed an environmentally controlled chamber and underwent intermittent exercise and ate food prepared by a team of nutritionists. Ad libitum water consumption was encouraged. The patient's body mass increased significantly due to water consumption and he eventually developed a rash and symptoms of hyponatraemia and was transferred to a nearby hospital | Unspecified                  | Acute - 10 hrs     | Fatigue, nausea, skin rash, malaise                                            | Plain water and flavoured water | Hyperhydration             | 122 | -                                                                  | Hypertonic saline (5%), overnight fluid restriction                | -                                                                                                                                                                                                                                                            | Recovery - patient was discharged the following morning with no further symptoms. His skin rash resolved 4 days after discharge                                                                                                      |
| 221 | Woodard et al. 1992   | USA    | Letter/case report               | 1  | 76          | F        | Patient had a history of diabetes mellitus and hypertension had been advised by her physician to "drink plenty of fluids" when she was hyperglycaemic. Following this advice, she drank excessive amounts of water and presented to emergency after 3-4 days with nausea and vomiting. She reported having drunk gallons of water because she believed her blood sugars were high (despite not having measured them)                                                                                                                                                                                                         | Insulin, hydrochlorothiazide | Chronic - 3-4 days | Nausea, vomiting                                                               | Water                           | Gallons/day                | 114 | -                                                                  | Normal saline, hydrochlorothiazide discontinued, water restriction | -                                                                                                                                                                                                                                                            | Recovery - patient excreted significant amounts of urine within the 1st day of admission. After 24 hrs, patient was discharged with a serum Na value of 133 mmol/L. At a 1-month follow-up her serum Na had normalised to 142 mmol/L |
| 222 | Takagi et al. 2011    | Japan  | Cohort study                     | 5  | 52          | 3 M, 2 F | Patients were identified from a population of inpatients at the National Centre of Neurology                                                                                                                                                                                                                                                                                                                                                                                                                                                                                                                                 | Unspecified                  | Unspecified        | Auditory hallucinations, epileptic seizures, loose associations, hyperactivity | Fluid                           | "Excessive fluid intake"   | 129 | -                                                                  | Acetazolamide                                                      | -                                                                                                                                                                                                                                                            | Recovery + ongoing - acetazolamide treatment improved polydipsia and serum Na in 4 of 5 patients                                                                                                                                     |

|     |                      |        |             |   |    |   |                                                                                                                                                                                                                                                                                                                                                                                                                                                                                                                                           |            |               |                                                          |       |                                  |     |   |                                         |   |                                                                                                                                                                                                                                           |
|-----|----------------------|--------|-------------|---|----|---|-------------------------------------------------------------------------------------------------------------------------------------------------------------------------------------------------------------------------------------------------------------------------------------------------------------------------------------------------------------------------------------------------------------------------------------------------------------------------------------------------------------------------------------------|------------|---------------|----------------------------------------------------------|-------|----------------------------------|-----|---|-----------------------------------------|---|-------------------------------------------------------------------------------------------------------------------------------------------------------------------------------------------------------------------------------------------|
|     |                      |        |             |   |    |   | and Psychiatry as having experienced excessive fluid intake and hyponatraemia. 3 patients had a history of schizophrenia, 1 had mental retardation and 1 had epilepsy and organic psychosis                                                                                                                                                                                                                                                                                                                                               |            |               |                                                          |       |                                  |     |   |                                         |   |                                                                                                                                                                                                                                           |
| 223 | Friedman et al. 1983 | Israel | Case report | 1 | 28 | M | Patient was admitted to hospital with acute urinary retention, having experienced terminal dribbling, dysuria and hesitancy on urination for 2 months. His treatment involved a 4 L/day water intake which resulted in some improvement. When he began to experience increasingly difficult urination resulting in complete retention, he was told to drink 30-40 glasses of water in 5 hrs. He subsequently developed nausea, vomiting and restlessness and it was discovered that he had an undiagnosed lower urinary tract obstruction | Ampicillin | Acute - 5 hrs | Nausea, vomiting, restlessness, tonic clonic convulsions | Water | 4 L/day + 30-40 glasses in 5 hrs | 117 | - | Suprapubic aspiration, diazepam (10 mg) | - | Recovery - patient had 1.1 L of urine drained over 2 hrs, then another 6.4 L over 19 hrs. He regained consciousness and his serum Na normalised after 48 hrs (140 mmol/L). At a 3-month follow-up, no further abnormalities were detected |

## Supplemental Data File 4: Excluded studies

| Reference                                                                                                                                                                                                                                                                                                      | Reason for exclusion   |
|----------------------------------------------------------------------------------------------------------------------------------------------------------------------------------------------------------------------------------------------------------------------------------------------------------------|------------------------|
| Maiocchi L, Bernardi E. Acute anterior compartment syndrome associated with psychogenic polydipsia. <i>Australasian Psychiatry</i> . 2012;20(2):159-61.                                                                                                                                                        | No serum sodium values |
| Anonymous. Update: Exertional hyponatremia, active component, U.S. Armed Forces, 1999-2011. <i>MSMR</i> . 2012;19(3):20-3.                                                                                                                                                                                     | No serum sodium values |
| Anonymous. Update: Exertional hyponatremia, active component, U.S. Armed Forces, 1999-2012. <i>MSMR</i> . 2013;20(3):25-8.                                                                                                                                                                                     | No serum sodium values |
| Armed Forces Health Surveillance C. Update: Exertional hyponatremia, active component, U.S. Armed Forces, 1999-2013. <i>MSMR</i> . 2014;21(3):18-21.                                                                                                                                                           | No serum sodium values |
| Anonymous. Update: Exertional hyponatremia, active component, U.S. Armed Forces, 1999-2014. <i>MSMR</i> . 2015;22(3):26-9.                                                                                                                                                                                     | No serum sodium values |
| Armed Forces Health Surveillance B. Update: Exertional hyponatremia, active component, U.S. Army, Navy, Air Force, and Marine Corps, 2000-2015. <i>MSMR</i> . 2016;23(3):25-8.                                                                                                                                 | No serum sodium values |
| Armed Forces Health Surveillance B. Update: Exertional hyponatremia, active component, U.S. Armed Forces, 2001-2016. <i>MSMR</i> . 2017;24(3):19-24.                                                                                                                                                           | No serum sodium values |
| Lieberman RP, Marshall BD, Jr. Polydipsia and hyponatremia. <i>Hospital &amp; Community Psychiatry</i> . 1993;44(2):184; author reply 5-6.                                                                                                                                                                     | No serum sodium values |
| Matsuo SI, Ninomiya H, Takasiba T, Sasaki Y. Anetholtrithion stabilizes body weight fluctuation caused by excessive water drinking in a patient with schizophrenia: A case report [2]. <i>Journal of Clinical Psychiatry</i> . 1999;60(10):706.                                                                | No serum sodium values |
| Ohsawa H, Kishimoto T, Hirai M, Shimayoshi N, Matsumura K, Oribe H, et al. An epidemiological study on hyponatremia in psychiatric patients in mental hospitals in Nara Prefecture. <i>Japanese Journal of Psychiatry and Neurology</i> . 1992;46(4):883-9.                                                    | No serum sodium values |
| Gupta B, Patel A, Kar SK. Polydipsia and anxiety as early warning signs of relapse in schizophrenia. <i>Asian Journal of Psychiatry</i> . 2018;31:81.                                                                                                                                                          | No serum sodium values |
| Bollmann DA. Water intoxication. <i>US Pharmacist</i> . 1991;16(8):H-18-H-20.                                                                                                                                                                                                                                  | No serum sodium values |
| Nishikawa T, Tsuda A, Tanaka M, Nishikawa M, Koga I, Uchida Y. Involvement of the endogenous opioid system in the drinking behavior of schizophrenic patients displaying self-induced water intoxication: a double-blind controlled study with naloxone. <i>Clinical Neuropharmacology</i> . 1996;19(3):252-8. | No serum sodium values |
| Nishikawa T, Tsuda A, Tanaka M, Nishikawa M, Koga I, Uchida Y. Naloxone attenuates drinking behavior in a schizophrenic patient displaying self-induced water intoxication. <i>Clinical Neuropharmacology</i> . 1992;15(4):310-4.                                                                              | No serum sodium values |
| Nishikawa T, Tsuda A, Tanaka M, Nishikawa M, Koga I, Uchida Y. Naloxone attenuates drinking behavior in psychiatric patients displaying self-induced water intoxication. <i>Prog Neuropsychopharmacol Biol Psychiatry</i> . 1994;18(1):149-53.                                                                 | No serum sodium values |
| Ginsberg DL. Losartan treatment of psychogenic polydipsia. <i>Primary Psychiatry</i> . 2004;11(12):23-4.                                                                                                                                                                                                       | No serum sodium values |

|                                                                                                                                                                                                                                                                   |                                                                                                                                      |
|-------------------------------------------------------------------------------------------------------------------------------------------------------------------------------------------------------------------------------------------------------------------|--------------------------------------------------------------------------------------------------------------------------------------|
| Bhatia MS, Goyal A, Saha R, Doval N. Psychogenic Polydipsia - Management Challenges. <i>Shanghai Arch Psychiatry</i> . 2017;29(3):180-3.                                                                                                                          | No serum sodium values                                                                                                               |
| Kawai N, Baba A, Suzuki T. Risperidone failed to improve polydipsia-hyponatremia of the schizophrenic patients. <i>Psychiatry Clin Neurosci</i> . 2002;56(1):107-10.                                                                                              | No serum sodium values                                                                                                               |
| Kishi Y, Kurosawa H, Endo S. Is propranolol effective in primary polydipsia? <i>International Journal of Psychiatry in Medicine</i> . 1998;28(3):315-25.                                                                                                          | No serum sodium values                                                                                                               |
| Fuller MA, Jurjus G, Kwon K, Konicki PE, Jaskiw GE. Clozapine reduces water-drinking behavior in schizophrenic patients with polydipsia. <i>Journal of Clinical Psychopharmacology</i> . 1996;16(4):329-32.                                                       | No serum sodium values                                                                                                               |
| Takeuchi K, Nagatani T, Okumura E, Wakabayashi T. A novel method for managing water and electrolyte balance after transsphenoidal surgery: preliminary study of moderate water intake restriction. <i>Nagoya Journal of Medical Science</i> . 2014;76(1-2):73-82. | Water intoxication not induced by oral water intake; caused by IV infusion during surgery                                            |
| Eaton J. Detection of hyponatremia in the PACU. <i>Journal of Perianesthesia Nursing</i> . 2003;18(6):392-7.                                                                                                                                                      | Water intoxication not induced by oral water intake; caused by IV infusion during surgery                                            |
| Mansberger AR, Jr., Boyd DR. "Too much water". <i>American Surgeon</i> . 1969;35(10):719-24.                                                                                                                                                                      | Water intoxication not induced by oral water intake; caused by IV                                                                    |
| Rebello F, Conseiller C, Hazemann P. EEG study of a case of water intoxication. <i>Electroencephalogr Clin Neurophysiol</i> . 1971;30(3):254.                                                                                                                     | Water intoxication not induced by oral water intake; caused by surgery                                                               |
| Gardner LB, Preston RA. University of Miami Division of Clinical Pharmacology Therapeutic Rounds: the water-intolerant patient and perioperative hyponatremia. <i>American Journal of Therapeutics</i> . 2000;7(1):23-30.                                         | Water intoxication not induced by oral water intake; caused by IV infusion during surgery                                            |
| Anonymous. Postoperative water intoxication with hypercapnia. <i>Anesth Analg</i> . 1972;51(3):368-70.                                                                                                                                                            | Water intoxication not induced by oral water intake; caused by IV infusion during surgery                                            |
| Russell JT. The dangers of overhydration during and after operations. Two case reports. <i>Samj, S</i> . 1968;42(40):1076-8.                                                                                                                                      | Water intoxication not induced by oral water intake; caused by IV infusion during surgery                                            |
| Moen V, Irested L. Water intoxication following labour and surgery: blaming oxytocin--the easy way out?... <i>Acta Anaesthesiol Scand</i> . 2009 Jul;53(6):826-7. <i>Acta Anaesthesiologica Scandinavica</i> . 2009;53(9):1226-.                                  | Water intoxication not induced by oral water intake; caused by IV infusion during labour                                             |
| Wakui H, Nishimura S, Watahiki Y, Endo Y, Nakamoto Y, Miura AB. Dramatic recovery from neurological deficits in a patient with central pontine myelinolysis following severe hyponatremia. <i>Japanese Journal of Medicine</i> . 1991;30(3):281-4.                | Water intoxication not induced by oral water intake; caused by IV treatment                                                          |
| Hughes PD, McNicol D, Mutton PM, Flynn GJ, Tuck R, Yorke P. Postoperative hyponatraemic encephalopathy: water intoxication. <i>Aust N Z J Surg</i> . 1998;68(2):165-8.                                                                                            | Water intoxication not induced by oral water intake; caused by IV infusion during surgery                                            |
| Miles AI, Needle MA. Fixed hyponatremia with normal responses to varying salt and water intakes. <i>New England Journal of Medicine</i> . 1971;284(1):26-8.                                                                                                       | Water intoxication not induced by oral water intake; hyponatremia induced by tube feeding                                            |
| Piton G, Hamza S, Fichet A, Vincent J, Minello A, Leverve X, et al. Sodium lactate in the treatment of severe hyponatremia in cirrhotic patients. Cases report. <i>Fundamental and Clinical Pharmacology</i> . 2012;26 (SUPPL.1):85-6.                            | Water intoxication not induced by oral water intake; hyponatremia associated with renal failure                                      |
| Malhotra I, Gopinath S, Janga KC, Greenberg S, Sharma SK, Tarkovsky R. Unpredictable nature of tolvaptan in treatment of hypervolemic hyponatremia: Case review on role of vaptans. <i>Case Reports in Endocrinology</i> . 2014;2014 (no pagination).             | Water intoxication not induced by oral water intake; hyponatremia induced by diuretics                                               |
| Castello L, Pirisi M, Sainaghi PP, Bartoli E. Quantitative treatment of the hyponatremia of cirrhosis. <i>Dig Liver Dis</i> . 2005;37(3):176-80.                                                                                                                  | Water intoxication not induced by oral water intake; hyponatraemia caused by water retention/Na depletion related to liver cirrhosis |
| Perucca E, Garratt A, Hebdige S, Richens A. Water intoxication in epileptic patients receiving carbamazepine. <i>J Neurol Neurosurg Psychiatry</i> . 1978;41(8):713-8.                                                                                            | Water intoxication not induced by oral water intake; mainly caused by drugs                                                          |
| Dandan W, Jianbo L, Shaojia L, Manli H, Shaohua H, Yi X, et al. Rapid-onset hyponatremia and delirium following duloxetine treatment for postherpetic neuralgia: Case report and literature review. <i>Medicine</i> . 2018;97(46):1-5.                            | Water intoxication not induced by oral water intake; hyponatremia caused by duloxetine and possible SIADH                            |
| Kahn T. Reset osmostat and salt and water retention in the course of severe hyponatremia. <i>Medicine</i> . 2003;82(3):170-6.                                                                                                                                     | Water intoxication not induced by oral water intake; caused by reset osmostat                                                        |
| Delva NJ, Crammer JL, Lawson JS, Lightman SL, Sribney M, Weier BJ. Vasopressin in chronic psychiatric patients with primary polydipsia. <i>British Journal of Psychiatry</i> . 1990;157:703-12.                                                                   | Water intoxication not entirely induced by oral water intake; hyponatremia caused by SIADH                                           |



|                                                                                                                                                                                                                                                                                   |                                                                                                                                                        |
|-----------------------------------------------------------------------------------------------------------------------------------------------------------------------------------------------------------------------------------------------------------------------------------|--------------------------------------------------------------------------------------------------------------------------------------------------------|
| Zhang L, Fu P, Wang L, Cai G, Zhang L, Chen D, et al. Hyponatraemia in patients with crush syndrome during the Wenchuan earthquake. <i>Emergency Medicine Journal</i> . 2013;30(9):745-8.                                                                                         | Water intoxication not entirely induced by oral water intake; hyponatremia caused by non-osmotic release of vasopressin and impaired urinary excretion |
| Arinzon Z, Feldman J, Peisakh A, Zuta A, Berner Y. Water and sodium disturbances predict prognosis of acute disease in long term cared frail elderly. <i>Arch Gerontol Geriatr</i> . 2005;40(3):317-26.                                                                           | Water intoxication not induced by oral water intake; caused by SIADH, incorrect hydration and continuous diuretic treatment                            |
| Rondon-Berrios H, Berl T. Vasopressin receptor antagonists in hyponatremia: uses and misuses. <i>Frontiers in Medicine</i> . 2017;4:141.                                                                                                                                          | Water intoxication not induced by oral water intake; caused by SIADH                                                                                   |
| Correia L, Ferreira R, Correia I, Lebre A, Carda J, Monteiro R, et al. Severe hyponatremia in older patients at admission in an internal medicine department. <i>Arch Gerontol Geriatr</i> . 2014;59(3):642-7.                                                                    | Water intoxication not induced by oral water intake alone; hyponatremia caused by drug iatrogeny and SIADH                                             |
| Ashraf N, Locksley R, Arieff AI. Thiazide-induced hyponatremia associated with death or neurologic damage in outpatients. <i>American Journal of Medicine</i> . 1981;70(6):1163-8.                                                                                                | Water intoxication not induced by oral water intake; hyponatremia caused by thiazide diuretics/urinary retention                                       |
| Hillary SL, Hemead H, Berthoud M, Balasubramanian SP. A case report on acute severe hyponatraemia following parathyroid surgery for primary hyperparathyroidism - A rare but life threatening complication. <i>International Journal of Surgery Case Reports</i> . 2016;21:136-8. | Water intoxication not induced by oral water intake; hyponatremia caused by IV infusion                                                                |
| Scoccia B, Scommegna A. Carbamazepine-induced hyponatremia after transabdominal follicular ultrasound examination. <i>Fertil Steril</i> . 1988;50(6):984-5.                                                                                                                       | Water intoxication not entirely induced by oral water intake; mainly caused by antidiuretic action of CBZ                                              |
| Herfel R, Stone CK, Koury SI, Blake JJ. Iatrogenic acute hyponatraemia in a college athlete. <i>British Journal of Sports Medicine</i> . 1998;32(3):257-8.                                                                                                                        | Water intoxication not entirely induced by oral water intake; hyponatremia caused by IV infusion                                                       |
| Ballardie FW, Mucklow JC. Partial reversal of carbamazepine-induced water intolerance by demeclocycline. <i>Br J Clin Pharmacol</i> . 1984;17(6):763-5.                                                                                                                           | Water intoxication not entirely induced by oral water intake; mainly caused by antidiuretic action of CBZ                                              |
| Kageyama K, Suda T. A case of hyponatremia after cervical spinal cord injury. <i>Endocrine Journal</i> . 2011;58(5):369-72.                                                                                                                                                       | Water intoxication not induced by oral water intake; hyponatremia as a complication of neurosurgical condition                                         |
| Roos J. Iatrogenic water-intoxication. <i>Neth J Surg</i> . 1981;33(2):75-8.                                                                                                                                                                                                      | Water intoxication not induced by oral water intake; caused by IV infusion during surgery                                                              |
| Moolten SE. Fatal brain swelling and overhydration. <i>J Med Soc N J</i> . 1971;68(6):509-12.                                                                                                                                                                                     | Water intoxication not induced by oral water intake; caused by overdose of insulin                                                                     |
| Sechi G, Manca S, Deiana GA, Corda DG, Pisu A, Rosati G. Acute hyponatremia and neuroleptic malignant syndrome in Parkinson's disease. <i>Prog Neuropsychopharmacol Biol Psychiatry</i> . 1996;20(3):533-42.                                                                      | Water intoxication not induced by oral water intake; hyponatremia as a complication of brain damage                                                    |
| Lipsmeyer E, Ackerman GL. Irreversible brain damage after water intoxication. <i>Jama</i> . 1966;196(3):286-8.                                                                                                                                                                    | Water intoxication not induced by oral water intake; hyponatremia caused by IV administration of large amounts of solute-free water                    |
| Giordano M, Ciarambino T, Castellino P, Malatino L, Cataliotti A, Rinaldi L, et al. Seasonal variations of hyponatremia in the emergency department: Age-related changes. <i>American Journal of Emergency Medicine</i> . 2017;35(5):749-52.                                      | Doesn't mention excess water intake                                                                                                                    |
| Canuso CM, Goldman MB. Clozapine restores water balance in schizophrenic patients with polydipsia-hyponatremia syndrome. <i>J Neuropsychiatry Clin Neurosci</i> . 1999;11(1):86-90.                                                                                               | Doesn't mention excess water intake                                                                                                                    |
| Traub SJ, Hoffman RS, Nelson LS. The "ecstasy" hangover: hyponatremia due to 3,4-methylenedioxymethamphetamine. <i>Journal of Urban Health</i> . 2002;79(4):549-55.                                                                                                               | Doesn't mention excess water intake                                                                                                                    |
| Godleski LS, Vieweg WVR, Leadbetter RA, Hundley PL, Harrington DP, Yank GR. Day-to-day care of chronic schizophrenic patients subject to water intoxication. <i>Annals of Clinical Psychiatry</i> . 1989;1(3):179-85.                                                             | Doesn't mention excess water intake + irrelevant intervention                                                                                          |
| Ting JY. Rhabdomyolysis and polydipsic hyponatraemia. <i>Emergency Medicine Journal</i> . 2001;18(6):520.                                                                                                                                                                         | No mention of oral water intake as a cause of hyponatremia                                                                                             |
| Nagamine T. 'Ultimatum Game' in a patient with Psychogenic Polydipsia. <i>International Medical Journal</i> . 2015;22(4):346.                                                                                                                                                     | No mention of oral water intake as a cause of hyponatremia                                                                                             |
| Koren MJ, Hamad A, Klasen S, Abeyratne A, McNutt BE, Kalra S. Efficacy and safety of 30-minute infusions of conivaptan in euvolemic and hypervolemic hyponatremia. <i>American Journal of Health-System Pharmacy</i> . 2011;68(9):818-27.                                         | No mention of oral water intake as a cause of hyponatremia                                                                                             |

|                                                                                                                                                                                                                                                                                                            |                                                                                                           |
|------------------------------------------------------------------------------------------------------------------------------------------------------------------------------------------------------------------------------------------------------------------------------------------------------------|-----------------------------------------------------------------------------------------------------------|
| Henderson DC, Goff DC. Clozapine for polydipsia and hyponatremia in chronic schizophrenics. <i>Biological Psychiatry</i> . 1994;36(11):768-70.                                                                                                                                                             | Only vague information about water intake                                                                 |
| Rice V. Overhydration. <i>CINA: Official Journal of the Canadian Intravenous Nurses Association</i> . 1991;7(3):4-6.                                                                                                                                                                                       | Only vague information about water intake                                                                 |
| Muller RJ, Lann HD. Thiazide diuretics and polydipsia in schizophrenic patients. <i>American Journal of Psychiatry</i> . 1991;148(3):390.                                                                                                                                                                  | Predominantly beverages other than water (3-4 quarts of beer + 6 L of soft drink)                         |
| Tomiyama J, Kametani H, Kumagai Y, Adachi Y, Tohri K. Water intoxication and rhabdomyolysis. <i>Japanese Journal of Medicine</i> . 1990;29(1):52-5.                                                                                                                                                        | Predominantly beverages other than water (tea + alcohol)                                                  |
| Schropfel B, Segerer S, Keuneke C, Cohen CD, Schlondorff D. Hyponatremic encephalopathy after preparation for colonoscopy. <i>Gastrointestinal Endoscopy</i> . 2001;53(4):527-9.                                                                                                                           | Predominantly beverages other than water (tea + bowel prep solution)                                      |
| Kruse D, Pantelis C, Rudd R, Quek J, Herbert P, McKinley M. Treatment of psychogenic polydipsia: Comparison of risperidone and olanzapine, and the effects of an adjunctive angiotensin-II receptor blocking drug (irbesartan). <i>Australian and New Zealand Journal of Psychiatry</i> . 2001;35(1):65-8. | Predominantly beverages other than water (20 L of cola)                                                   |
| Rizzieri DA. Rhabdomyolysis after correction of hyponatremia due to psychogenic polydipsia. <i>Mayo Clin Proc</i> . 1995;70(5):473-6.                                                                                                                                                                      | Predominantly beverages other than water (64 ounces of beer/week)                                         |
| Frizzell RT, Lang GH, Lowance DC, Lathan SR. Hyponatremia and ultramarathon running. <i>Jama</i> . 1986;255(6):772-4.                                                                                                                                                                                      | Predominantly beverages other than water (12 L of ERG and 8 L of cola)                                    |
| Bugle C, Andrew S, Heath J. Early detection of water intoxication. <i>Journal of Psychosocial Nursing &amp; Mental Health Services</i> . 1992;30(11):31-4.                                                                                                                                                 | Not a study; discussion paper on strategies for early detection of water intoxication risk                |
| Flear CT, Gill GV, Burn J. Hyponatraemia: mechanisms and management. <i>Lancet</i> . 1981;2(8236):26-31.                                                                                                                                                                                                   | Not a study; discussion paper on mechanisms and management of hyponatraemia                               |
| Kear TM. Fluid and Electrolyte Management Across the Age Continuum. <i>Nephrology Nursing Journal</i> . 2017;44(6):491-7.                                                                                                                                                                                  | Not a study; discussion paper on disorders of fluid and electrolytes and nursing implications             |
| Vachharajani TJ, Zaman F, Abreo KD. Hyponatremia in critically ill patients. <i>Journal of Intensive Care Medicine</i> . 2003;18(1):3-8.                                                                                                                                                                   | Not a study; discussion paper on approach to diagnosis and management of hyponatraemia                    |
| Nagler EV, Haller MC, Van Biesen W, Vanholder R, Craig JC, Webster AC. Interventions for chronic non-hypovolaemic hypotonic hyponatraemia. <i>Cochrane Database of Systematic Reviews</i> . 2018(6).                                                                                                       | Not a study; systematic review on interventions for hyponatraemia                                         |
| Guppy PBM, Mickan SM, Del Mar CB, Thorning S, Rack A. Advising patients to increase fluid intake for treating acute respiratory infections. <i>Cochrane Database of Systematic Reviews</i> . 2011(2).                                                                                                      | Not a study; systematic review on increasing fluid intake for treating acute respiratory infections       |
| Narins RG. Hyponatraemia - Review of a controversial case. <i>Nephrology Dialysis Transplantation</i> . 2001;16(SUPPL. 6):36-7.                                                                                                                                                                            | Not a study; review with questions                                                                        |
| Speedy DB, Noakes TD, Schneider C. Exercise-associated hyponatremia: a review. <i>Emerg Med (Fremantle)</i> . 2001;13(1):17-27.                                                                                                                                                                            | Not a study; review on exercise-associated hyponatraemia                                                  |
| Peters EM. Nutritional aspects in ultra-endurance exercise. <i>Current Opinion in Clinical Nutrition and Metabolic Care</i> . 2003;6(4):427-34.                                                                                                                                                            | Not a study; review on fluid homeostasis during ultra-endurance exercise                                  |
| Illowsky BP, Kirch DG. Polydipsia and hyponatremia in psychiatric patients. <i>American Journal of Psychiatry</i> . 1988;145(6):675-83.                                                                                                                                                                    | Not a study; review on polydipsia and hyponatremia in psychiatric patients                                |
| Rolls BJ, Phillips PA, Phil D. Aging and disturbances of thirst and fluid balance. <i>Nutrition Reviews</i> . 1990;48(3):137-44.                                                                                                                                                                           | Not a study; review on aging and fluid balance                                                            |
| Andreucci VE, Russo D, Cianciaruso B, Andreucci M. Some sodium, potassium and water changes in the elderly and their treatment. <i>Nephrology Dialysis Transplantation</i> . 1996;11 Suppl 9:9-17.                                                                                                         | Not a study; review on water changes in elderly                                                           |
| Hwang KS, Kim GH. Thiazide-induced hyponatremia. <i>Electrolyte Blood Press</i> . 2010;8(1):51-7.                                                                                                                                                                                                          | Not a study; review of thiazide-induced hyponatremia                                                      |
| Ali SN, Bazzano LA. Hyponatremia in Association With Second-Generation Antipsychotics: A Systematic Review of Case Reports. <i>Ochsner Journal</i> . 2018;18(3):230-5.                                                                                                                                     | Not a study; systematic review on effect of second-generation antipsychotics on incidence of hyponatremia |
| Miller M. Hyponatremia in the elderly: risk factors, clinical consequences, and management. <i>Clinical Geriatrics</i> . 2009;17(9):34-9.                                                                                                                                                                  | Not a study; discussion paper on risk factors, consequences and management of hyponatremia in the elderly |
| Humes HD, Narins RG, Brenner BM. Disorders of water balance. <i>Hosp Pract</i> . 1979;14(3):133-45.                                                                                                                                                                                                        | Not a study; review of disorders of water balance                                                         |

|                                                                                                                                                                                                                                                         |                                                                                                |
|---------------------------------------------------------------------------------------------------------------------------------------------------------------------------------------------------------------------------------------------------------|------------------------------------------------------------------------------------------------|
| De Leon J, Verghese C, Tracy JI, Josiassen RC, Simpson GM. Polydipsia and water intoxication in psychiatric patients: A review of the epidemiological literature. <i>Biological Psychiatry</i> . 1994;35(6):408-19.                                     | Not a study; review on mechanisms of polydipsia and water intoxication in psychiatric patients |
| Lown B. The Water Craze. <i>South African Family Practice</i> . 2009;51(5):393-4.                                                                                                                                                                       | Not a study; discussion paper on fluid intake recommendations                                  |
| Miller GT, Garcia TB. Case of the month. The delicate balance of hydration. <i>JEMS: Journal of Emergency Medical Services</i> . 2006;31(8):36-40.                                                                                                      | Not a study; discussion paper on approach to management of hyponatraemia                       |
| Hajjar RR. Age-related issues in volume overload and hyponatremia in the elderly. <i>J Nutr Health Aging</i> . 1997;1(3):146-50.                                                                                                                        | Not a study; review of age on risk of hyponatremia                                             |
| Moritz ML, Ayus JC. Management of hyponatremia in various clinical situations. <i>Current Treatment Options in Neurology</i> . 2014;16(9):310.                                                                                                          | Not a study; discussion paper on management of hyponatremia                                    |
| Noakes TD. Running, the kidneys and drinking too much - The hyponatraemia of exercise. <i>South African Medical Journal</i> . 2001;91(10 I):843-4.                                                                                                      | Not a study; editorial on exercise and hyponatraemia                                           |
| Akram M, Hamid A. A comprehensive review on water balance. <i>Biomedicine and Preventive Nutrition</i> . 2013;3(2):193-5.                                                                                                                               | Not a study; review on water balance                                                           |
| Siegel AJ. Fatal water intoxication and cardiac arrest in runners during marathons: prevention and treatment based on validated clinical paradigms. <i>American Journal of Medicine</i> . 2015;128(10):1070-5.                                          | Not a study; review on exercise and water intoxication                                         |
| Zetterstrom R. Voluntary and therapeutic causes of water intoxication and hypertonic dehydration: Perinatal risks in mother and offspring. <i>Scandinavian Journal of Nutrition/Naringsforskning</i> . 2003;47(3):108-10.                               | Not a study; review of water intoxication in mothers and offspring                             |
| Jose CJ, Barton JL, Perez-Cruet J. Hyponatremic seizures in psychiatric patients. <i>Biological Psychiatry</i> . 1979;14(5):839-43.                                                                                                                     | Not a study; review of case reports from other literature                                      |
| Vieweg WV, Karp BI. Severe hyponatremia in the polydipsia-hyponatremia syndrome. <i>Journal of Clinical Psychiatry</i> . 1994;55(8):355-61.                                                                                                             | Not a study; review of polydipsia-hyponatremia syndrome                                        |
| Box SA, Prescott LF, Freestone S. Hyponatraemia at a rave. <i>Postgraduate Medical Journal</i> . 1997;73(855):53-4.                                                                                                                                     | Not a study; note with questions and answers                                                   |
| Gardner LB. Hyponatremia: artifact or emergency? <i>Emergency Medicine (00136654)</i> . 1991;23(8):117-24.                                                                                                                                              | Not a study; case studies, not case reports                                                    |
| Chen X, Huang G. Autopsy case report of a rare acute iatrogenic water intoxication with a review of the literature. <i>Forensic Science International</i> . 1995;76(1):27-34.                                                                           | Not a study; case report didn't provide information on serum sodium values                     |
| Åkefeldt A. Water intake and risk of hyponatraemia in Prader-Willi syndrome. <i>Journal of Intellectual Disability Research</i> . 2009;53(6):521-8.                                                                                                     | Mix of children and adults                                                                     |
| Oades RD, Daniels R. Subclinical polydipsia and polyuria in young patients with schizophrenia or obsessive-compulsive disorder vs normal controls. <i>Prog Neuropsychopharmacol Biol Psychiatry</i> . 1999;23(8):1329-44.                               | Not directly related to hyponatraemia + mix of children and adults                             |
| Balcioglu YH, Seren Kirlioglu S, Ozdemir EF, Oncu F. Co-occurrence of primary polydipsia and bipolar disorder: Can it be a sign of HPA axis dysfunction? <i>Anadolu Psikiyatri Dergisi</i> . 2017;18(Supplement 1):8-10.                                | Not directly related to hyponatraemia                                                          |
| Hawken ER, Crookall JM, Reddick D, Millson RC, Milev R, Delva N, et al. Mortality over a 20-year period in patients with primary polydipsia associated with schizophrenia: a retrospective study. <i>Schizophrenia Research</i> . 2009;107(2/3):128-33. | Not directly related to hyponatraemia                                                          |
| Tam N, Nolte HW, Noakes TD. Changes in total body water content during running races of 21.1 km and 56 km in athletes drinking ad libitum. <i>Clinical Journal of Sport Medicine</i> . 2011;21(3):218-25.                                               | Not directly related to hyponatraemia                                                          |
| Ridpath A, Driver CR, Nolan ML, Karpati A, Kass D, Paone D, et al. Illnesses and deaths among persons attending an electronic dance-music festival - New York City, 2013. <i>MMWR: Morbidity &amp; Mortality Weekly Report</i> . 2014;63(50):1195-8.    | Not directly related to hyponatraemia                                                          |
| Perrier E, Klein A. Short-term Physiological Effects of Increased Water Intake in a Clinical Setting. <i>Nutrition Today</i> . 2013:S32-5.                                                                                                              | Not directly related to hyponatraemia                                                          |
| Hayashi T, Nishikawa T, Koga I, Uchida Y, Horiguchi J, Yamawaki S. Involvement of the alpha2-adrenergic system in polydipsia in schizophrenic patients: a pilot study. <i>Psychopharmacology (Berl)</i> . 1997;130(4):382-6.                            | Not directly related to hyponatraemia                                                          |
| Duraiswamy K, Rao NP, Venkatasubramanian G, Behere RV, Varambally SS, Gangadhar BN. Psychogenic polydipsia in bipolar affective disorder--a case report. <i>General Hospital Psychiatry</i> . 2011;33(1):84.e9-10.                                      | Not directly related to hyponatremia                                                           |
| Greendyke RM, Bernhardt AJ, Tasbas HE, Lewandowski KS. Polydipsia in chronic psychiatric patients: Therapeutic trials of clonidine and enalapril. <i>Neuropsychopharmacology</i> . 1998;18(4):272-81.                                                   | Not directly related to hyponatremia                                                           |

|                                                                                                                                                                                                                                                                                                             |                                                                                        |
|-------------------------------------------------------------------------------------------------------------------------------------------------------------------------------------------------------------------------------------------------------------------------------------------------------------|----------------------------------------------------------------------------------------|
| Shutty MS, Jr., Briscoe L, Sautter S, Leadbetter RA. Neuropsychological manifestations of hyponatremia in chronic schizophrenic patients with the syndrome of psychosis, intermittent hyponatremia and polydipsia (PIP). <i>Schizophrenia Research</i> . 1993;10(2):125-30.                                 | Irrelevant outcomes                                                                    |
| Shalev E, Goldstein D, Zuckerman H. Compulsive water drinking in pregnancy. <i>Int J Gynaecol Obstet</i> . 1980;18(6):465-7.                                                                                                                                                                                | Irrelevant outcomes                                                                    |
| Vieweg WVR, Harrington DP, Westerman PS, McKelway RB, Hundley PL, Yank GR. Seasonal stability of water balance among schizophrenic patients subject to water intoxication. <i>Progress in Neuro-Psychopharmacology and Biological Psychiatry</i> . 1990;14(2):215-22.                                       | Irrelevant outcomes                                                                    |
| Nagashima T, Inoue M, Kitamura S, Kiuchi K, Kosaka J, Okada K, et al. Brain structural changes and neuropsychological impairments in male polydipsic schizophrenia. <i>BMC Psychiatry</i> . 2012;12:210.                                                                                                    | Irrelevant outcomes                                                                    |
| de Leon J, Dadvand M, Canuso C, Odom-White A, Stanilla J, Simpson GM. Polydipsia and water intoxication in a long-term psychiatric hospital. <i>Biological Psychiatry</i> . 1996;40(1):28-34.                                                                                                               | Irrelevant outcomes                                                                    |
| Mears SA, Shirreffs SM. Voluntary water intake during and following moderate exercise in the cold. <i>International journal of sport nutrition and exercise metabolism</i> . 2014;24(1):47-58.                                                                                                              | Irrelevant outcomes                                                                    |
| De Leon J. Polydipsia: A study in a long-term psychiatric unit. <i>European Archives of Psychiatry and Clinical Neuroscience</i> . 2003;253(1):37-9.                                                                                                                                                        | Irrelevant outcomes                                                                    |
| Knechtle B, Senn O, Imoberdorf R, Joleska I, Wirth A, Knechtle P, et al. Maintained total body water content and serum sodium concentrations despite body mass loss in female ultra-runners drinking ad libitum during a 100 km race. <i>Asia Pacific Journal of Clinical Nutrition</i> . 2010;19(1):83-90. | Irrelevant outcomes                                                                    |
| Schnur DB, Frick S, Smith S. Temporal stability of polydipsia-hyponatremia. <i>Schizophrenia Research</i> . 1997;26(2-3):199-202.                                                                                                                                                                           | Irrelevant outcomes                                                                    |
| Galun E, Tur-Kaspa I, Assia E, Burstein R, Strauss N, Epstein Y, et al. Hyponatremia induced by exercise: a 24-hour endurance march study. <i>Miner Electrolyte Metab</i> . 1991;17(5):315-20.                                                                                                              | Serum sodium values not indicative of hyponatraemia                                    |
| Vieweg WVR, David JJ, Rowe WT. Psychogenic polydipsia and water intoxication - Concepts that have failed. <i>Biological Psychiatry</i> . 1985;20(12):1308-20.                                                                                                                                               | Irrelevant intervention/outcomes + serum sodium values not indicative of hyponatraemia |
| Canuso CM, Goldman MB. Does minimizing neuroleptic dosage influence hyponatremia? <i>Psychiatry Research</i> . 1996;63(2-3):227-9.                                                                                                                                                                          | Irrelevant intervention/outcomes                                                       |
| Kopala LC, Good KP, Koczapski AB, Honer WG. Olfactory deficits in patients with schizophrenia and severe polydipsia. <i>Biological Psychiatry</i> . 1998;43(7):497-502.                                                                                                                                     | Irrelevant intervention/outcomes                                                       |
| Vergheze C, Levitan I, Nair C, Abraham G, Garber SS, Josiassen RC. Impaired lymphocyte volume regulation in schizophrenic patients with polydipsia-hyponatremia. <i>Biological Psychiatry</i> . 1997;42(8):733-6.                                                                                           | Irrelevant intervention/outcomes                                                       |
| Frisbie JH. Salt wasting, hypotension, polydipsia, and hyponatremia and the level of spinal cord injury. <i>Spinal Cord</i> . 2007;45(8):563-8.                                                                                                                                                             | Irrelevant intervention/outcomes                                                       |
| Williams ST, Kores RC. Psychogenic polydipsia: comparison of a community sample with an institutionalized population. <i>Psychiatry Research</i> . 2011;187(1-2):310-1.                                                                                                                                     | Irrelevant intervention/outcomes                                                       |
| Lindeman E, Fredriksson I. Ecstasy-associated hyponatremia: Treat them like marathon runners. <i>Clinical Toxicology</i> . 2019;57(6):511.                                                                                                                                                                  | Abstract only                                                                          |
| Siregar P, Susalit E, Wirawan R, Setiati S, Waspadji S. Optimal water intake for the elderly: Prevention of hyponatremia. <i>Nephrology</i> . 2010;15:94.                                                                                                                                                   | Abstract only                                                                          |
| Bosworth KV, Gohil S, Ikram U. Insatiable thirst: is obstetric hyponatraemia under recognised? <i>International Journal of Obstetric Anesthesia</i> . 2019;39 (Supplement 1):59.                                                                                                                            | Abstract only                                                                          |
| Forde H, O'Shea T, Davenport C, Smith D. Acute symptomatic hyponatraemia following sodium picosulfate/magnesium citrate as bowel preparation for colonoscopy-a case series. <i>Irish Journal of Medical Science</i> . 2014;183(9):S469.                                                                     | Abstract only                                                                          |
| Vieweg WV, Rowe WT, David JJ, Spradlin WW. Oral sodium chloride in the management of schizophrenic patients with self-induced water intoxication. <i>Journal of Clinical Psychiatry</i> . 1985;46(1):16-9.                                                                                                  | Unable to obtain text in time                                                          |

|                                                                                                                                                                                                                                                         |                               |
|---------------------------------------------------------------------------------------------------------------------------------------------------------------------------------------------------------------------------------------------------------|-------------------------------|
| Verhoeven A, Musch W, Decaux G. Treatment of the polydipsia-hyponatremia syndrome with urea. <i>Journal of Clinical Psychiatry</i> . 2005;66(11):1372-5.                                                                                                | Unable to obtain text in time |
| Tanneau RS, Henry A, Rouhart F, Bourbigot B, Garo B, Mocquard Y, et al. High incidence of neurologic complications following rapid correction of severe hyponatremia in polydipsic patients. <i>Journal of Clinical Psychiatry</i> . 1994;55(8):349-54. | Unable to obtain text in time |
| Spears NM, Leadbetter RA, Shutty MS, Jr. Clozapine treatment in polydipsia and intermittent hyponatremia. <i>Journal of Clinical Psychiatry</i> . 1996;57(3):123-8.                                                                                     | Unable to obtain text in time |
| Munn NA. Resolution of polydipsia and hyponatremia in schizophrenic patients after clozapine treatment. <i>Journal of Clinical Psychiatry</i> . 1993;54(11):439.                                                                                        | Unable to obtain text in time |
| Gibbs CJ, Lee HA. Severe hyponatraemia in a quadriplegic. <i>British Journal of Clinical Practice</i> . 1994;48(1):53-4.                                                                                                                                | Unable to obtain text in time |

## Supplemental Data File 5: Full risk of bias assessment

| Author                    | Selection                                                                                                                                                  | Risk of bias                                                                              |                                                                                             |                                                                                       |                                                                                                                                      |                                                                                                                  |                                                                                                 |                                                                                                                                                                                                                                 | Score |
|---------------------------|------------------------------------------------------------------------------------------------------------------------------------------------------------|-------------------------------------------------------------------------------------------|---------------------------------------------------------------------------------------------|---------------------------------------------------------------------------------------|--------------------------------------------------------------------------------------------------------------------------------------|------------------------------------------------------------------------------------------------------------------|-------------------------------------------------------------------------------------------------|---------------------------------------------------------------------------------------------------------------------------------------------------------------------------------------------------------------------------------|-------|
|                           |                                                                                                                                                            | Ascertainment                                                                             |                                                                                             | Causality (adverse drug effects only)                                                 |                                                                                                                                      |                                                                                                                  | Reporting                                                                                       |                                                                                                                                                                                                                                 |       |
|                           | Is the patient/cohort representative of typical cases? (Yes = 1, No = 0)                                                                                   | Was the exposure adequately ascertained? (Yes = 1, No = 0) - excess water intake          | Was the outcome adequately ascertained? (Hyponatraemia/serum Na) (Yes = 1, No = 0)          | Were alternative causes of the outcome ruled out? (Yes = 1, No = 0) - medication only | Was there a challenge/re-challenge phenomenon? (Yes = 1, No = 0) - medication only                                                   | Was there a dose response effect? (Yes = 1, No = 0) - medication only                                            | Was follow-up long enough for outcome to occur? (Yes = 1, No = 0) - resolution of hyponatraemia | Was the case described with enough detail to allow other investigators to replicate the search or to allow practitioners to make inferences related to their own practice? (Yes = 1, No = 0) - related to treatment and outcome |       |
| Kashiura et al. 2017      | Yes, patients were all admitted to hospital with hyponatraemia and polydipsia                                                                              | Yes, patients all drank > 6 L/day                                                         | Yes, average serum Na = 110.5 mmol/L                                                        | Yes, underlying mental disorders with relevant treatments                             | No                                                                                                                                   | No                                                                                                               | No, unclear                                                                                     | Yes, adequate detail provided                                                                                                                                                                                                   | 5     |
| Pal et al. 2017           | Yes, the patient presented to outpatient department with hyponatraemia                                                                                     | Yes, the patient consumed 12-15 L of water/day                                            | Yes, serum Na = 94 mmol/L                                                                   | No                                                                                    | Yes, levodopa therapy from 100-400 mg/day over a period of 2 weeks                                                                   | Yes, patient improved drastically with levodopa therapy                                                          | Yes, 2 weeks. Repeat MRI done after 1 month                                                     | Yes, adequate detail provided                                                                                                                                                                                                   | 7     |
| Suzuki et al. 2016        | No, patient was found dead                                                                                                                                 | Yes, patient repeatedly drank a large amount of water                                     | Yes, serum Na = 85 mmol/L and vitreous humor = 105 mmol/L right eye and 107 mmol/L left eye | No                                                                                    | No                                                                                                                                   | No                                                                                                               | No                                                                                              | No, patient died                                                                                                                                                                                                                | 2     |
| De Soto et al. 1985       | Yes, patient was admitted to hospital for a prostate biopsy where he experienced a grand mal seizure due to hyponatraemia caused by excessive fluid intake | Yes, patient drank between 20-30 L of fluid/day                                           | Yes, serum Na = 119 mmol/L                                                                  | Yes, lithium carbonate and fluphenazine for schizoaffective disorder                  | Yes, lithium carbonate and fluphenazine were discontinued in favour of carbamazepine. Fluphenazine was continued again after 3 weeks | Yes, symptoms resolved                                                                                           | Yes, 4 weeks                                                                                    | Yes, adequate detail provided                                                                                                                                                                                                   | 8     |
| Narci 2013                | Yes, patient was admitted to hospital with hyponatraemia                                                                                                   | Yes, patient drank > 10 L of water over several hrs                                       | Yes, serum Na = 129 mmol/L                                                                  | No                                                                                    | No                                                                                                                                   | No                                                                                                               | No                                                                                              | Yes, adequate detail provided                                                                                                                                                                                                   | 4     |
| Shutty et al. 1993        | Yes, patient was admitted to psychiatric department with hyponatraemia                                                                                     | Yes, patient drank 2.6 L of water/hr                                                      | Yes, serum Na = 118 mmol/L                                                                  | Yes, schizophrenia + hyperthyroidism treated with methimazole                         | Yes, patient was trialed on thiothixene and lithium                                                                                  | Yes, medication appeared to be ineffective as patient continued to periodically drink excessive amounts of water | Yes, 10 months                                                                                  | Yes, adequate detail provided                                                                                                                                                                                                   | 8     |
| Porter et al. 2007        | Yes, patient was admitted to hospital following a hyponatraemia-induced seizure                                                                            | Yes, patient estimated intake of 10 L of water/day                                        | Yes, serum Na = 112 mmol/L                                                                  | No                                                                                    | No                                                                                                                                   | No                                                                                                               | No                                                                                              | Yes, adequate detail provided                                                                                                                                                                                                   | 4     |
| O'Brien et al. 2001       | Yes, patients were all admitted to hospital with hyponatraemia                                                                                             | Yes, all patients consumed large quantities of water                                      | Yes, serum Na ranged from 121-128 mmol/L                                                    | No                                                                                    | No                                                                                                                                   | No                                                                                                               | No                                                                                              | No, 1 patient's outcome was not reported and no details were provided regarding types of treatment for any of the patients                                                                                                      | 3     |
| Sato et al. 2018          | Yes, patient was admitted to hospital with hyponatraemia                                                                                                   | Yes, patient consumed 1 L of water over 6 hrs                                             | Yes, serum Na = 120 mmol/L                                                                  | No                                                                                    | No                                                                                                                                   | No                                                                                                               | No                                                                                              | Yes, adequate detail provided                                                                                                                                                                                                   | 4     |
| Noakes et al. 1985        | Yes, patients were all admitted to hospital with hyponatraemia                                                                                             | Yes, all patients consumed large quantities of water ranging from ~6-12.5 L over 7-10 hrs | Yes, serum Na ranged from 115-125 mmol/L                                                    | No                                                                                    | No                                                                                                                                   | No                                                                                                               | No                                                                                              | Yes, adequate detail provided                                                                                                                                                                                                   | 4     |
| Rae 1976                  | Yes, patient experienced chronic hyponatraemia caused by excessive water intake                                                                            | Yes, patient consumed 6.2 L of water/day                                                  | Yes, serum Na = 111 mmol/L                                                                  | Yes, schizophrenia treated with trifluoperazine                                       | No                                                                                                                                   | No                                                                                                               | No                                                                                              | Yes, adequate detail provided                                                                                                                                                                                                   | 5     |
| Chapman et al. 2008       | Yes, patient experienced hyponatraemia due to excess water intake                                                                                          | Yes, patient consumed > 4 L of water/day                                                  | Yes, serum Na = 111 mmol/L                                                                  | No                                                                                    | No                                                                                                                                   | No                                                                                                               | Yes, 2 weeks                                                                                    | Yes, adequate detail provided                                                                                                                                                                                                   | 5     |
| Davis et al. 2001         | Yes, patients experienced hyponatraemia due to excess water intake                                                                                         | No, unclear                                                                               | Yes, serum Na = ~125 mmol/L                                                                 | No                                                                                    | No                                                                                                                                   | No                                                                                                               | No                                                                                              | No, limited detail regarding volume of water consumed                                                                                                                                                                           | 2     |
| Goldman 1994              | No, unclear                                                                                                                                                | No, unclear                                                                               | Yes, serum Na = 119 mmol/L                                                                  | Yes, schizophrenia treated with lithium and lorazepam                                 | Yes, lithium was discontinued and then restarted                                                                                     | Yes, her psychiatric symptoms improved temporarily                                                               | No                                                                                              | No, limited detail regarding volume of water consumed and potential causes of death                                                                                                                                             | 4     |
| Budisavljević et al. 2003 | Yes, patient experienced hyponatraemia due to excess water intake                                                                                          | Yes, patient drank "a lot" of water due to excessive thirst after ecstasy ingestion       | Yes, serum Na = 124 mmol/L                                                                  | Yes, MDMA caused excessive thirst in the patient                                      | No                                                                                                                                   | No                                                                                                               | No                                                                                              | Yes, adequate detail provided                                                                                                                                                                                                   | 5     |
| Parkinson et al. 2013     | Yes, patient experienced hyponatraemia due to excess water intake                                                                                          | Yes, patient consumed 5-7 L of water over the course of 24 hrs                            | Yes, serum Na = 127 mmol/L                                                                  | No                                                                                    | No                                                                                                                                   | No                                                                                                               | No                                                                                              | Yes, adequate detail provided                                                                                                                                                                                                   | 4     |



|                            |                                                                                             |                                                                                                                                           |                                                    |                                                                                           |                                                                                          |                                    |               |                                                                                                      |   |
|----------------------------|---------------------------------------------------------------------------------------------|-------------------------------------------------------------------------------------------------------------------------------------------|----------------------------------------------------|-------------------------------------------------------------------------------------------|------------------------------------------------------------------------------------------|------------------------------------|---------------|------------------------------------------------------------------------------------------------------|---|
| Adetoki et al. 2013        | Yes, patient experienced hyponatraemia due to excess water intake                           | Yes, patient consumed "copious quantities" of water                                                                                       | Yes, serum Na = 109 mmol/L                         | Yes, poor compliance with olanzapine, clonazepam and pipotiazine palmitate                | No                                                                                       | No                                 | No            | Yes, adequate detail provided                                                                        | 5 |
| Hsu et al. 2005            | Yes, patients experienced hyponatraemia due to excess water intake                          | Yes, patients consumed from 2.5-10 L of water per day                                                                                     | Yes, serum Na = ~115 mmol/L                        | Yes, MDMA, haloperidol, amisulpride, clonazepam, hydrochlorothiazide, amiloride           | No                                                                                       | No                                 | No            | Yes, adequate detail provided                                                                        | 5 |
| Akasaki et al. 1993        | Yes, patient was admitted to hospital following a hyponatraemia-induced convulsion and coma | Yes, patient consumed a "large quantity of water during the previous 2 years"                                                             | Yes, serum Na = 116 mmol/L                         | Yes, spiperone                                                                            | No                                                                                       | No                                 | No            | Yes, adequate detail provided                                                                        | 5 |
| Vieweg et al. 1985         | No, unclear                                                                                 | No, unclear                                                                                                                               | Yes, serum Na = ~111 mmol/L                        | Yes, schizophrenia treated with antipsychotic agents                                      | No                                                                                       | No                                 | No            | No, limited detail regarding type and volume of fluid, treatment types and potential causes of death | 2 |
| Algahtani et al. 2008      | Yes, patient was admitted to hospital with hyponatraemia                                    | Yes, patient had been restricting her diet to only drinking the holy water, Zamzam as recommended by an alternative medicine practitioner | Yes, serum Na = 109 mmol/L                         | No                                                                                        | No                                                                                       | No                                 | No            | No, patient died                                                                                     | 3 |
| Hiramatsu et al. 2007      | Yes, patient was admitted to hospital with hyponatraemia                                    | Yes, patient drank 4 L of water in 3 hrs                                                                                                  | Yes, serum Na = 124 mmol/L                         | No                                                                                        | No                                                                                       | No                                 | No            | Yes, adequate detail provided                                                                        | 4 |
| Pavalonis et al. 1992      | Yes, patient experienced intermittent hyponatraemia throughout the years                    | Yes, patient drank up to 35 L of water per day, with an average consumption of 10 L                                                       | Yes, serum Na = ~130 mmol/L                        | No                                                                                        | Yes, patient was treated with a combination of lithium and phenytoin                     | No                                 | Yes, 23 weeks | Yes, adequate detail provided                                                                        | 6 |
| Tallis 1989                | Yes, patients all presented to hospital with hyponatraemia                                  | Yes, patients all consumed large amounts of water                                                                                         | Yes, serum Na = ~114 mmol/L                        | Yes, antipsychotic medication                                                             | No                                                                                       | No                                 | No            | Yes, adequate detail provided                                                                        | 5 |
| Chondrogiannis et al. 2009 | Yes, patient presented to hospital with hyponatraemia                                       | Yes, patient consumed 8-10 L of water/day                                                                                                 | Yes, serum Na = 126 mmol/L                         | Unclear                                                                                   | No                                                                                       | No                                 | No            | Yes, adequate detail provided                                                                        | 4 |
| Phull et al. 2011          | Yes, patient presented to hospital with hyponatraemia secondary to paranoid schizophrenia   | Yes, patient consumed excess water to 'flush' out his kidneys and also potentially drank extra water from the toilet                      | Yes, serum Na = 90 mmol/L                          | Yes, poor compliance with antidepressant and anticholinergic medication                   | Yes, olanzapine velotabs and intramuscular injections                                    | Yes, psychiatric symptoms improved | Yes, 155 days | Yes, adequate detail provided                                                                        | 8 |
| Chamberlain 2012           | Yes, patient presented to hospital with hyponatraemia secondary to paranoid schizophrenia   | Yes, patient consumed excess water to 'flush' out his system and prevent another kidney stone                                             | Yes, serum Na = 115 mmol/L                         | Yes, poor compliance with antipsychotic medication                                        | Yes, frequent doses of lorazepam and haloperidol                                         | Yes, psychiatric symptoms improved | Yes, > 1 week | Yes, adequate detail provided                                                                        | 8 |
| de Leon et al. 1995        | Yes, patients presented with hyponatraemia                                                  | Yes, patients consumed excessive amounts of water                                                                                         | Yes, serum Na = 116 mmol/L                         | Yes, schizophrenia treated with haloperidol, loxapine, lithium, phenytoin and propranolol | Yes, patients were trialed on clozapine at varying doses                                 | Yes, polydipsia improved           | Yes, > 1 year | Yes, adequate detail provided                                                                        | 8 |
| Young et al. 1987          | Yes, patient presented with hyponatraemia                                                   | Yes, patient consumed excessive amounts of water                                                                                          | Yes, serum Na = 123 mmol/L                         | No                                                                                        | No                                                                                       | No                                 | No            | Yes, adequate detail provided                                                                        | 4 |
| el-Mallakh et al. 1990     | Yes, patient presented with hyponatraemia                                                   | Yes, patient was noted to "binge drink" water                                                                                             | Yes, serum Na = ~127 mmol/L                        | Yes, schizophrenia treated with fluphenazine and bantzropine                              | Yes, patient was treated with a combination of lithium and a neuroleptic                 | Yes, psychiatric symptoms improved | No, unclear   | Yes, adequate detail provided                                                                        | 7 |
| Shah et al. 1992           | Yes, patients presented with hyponatraemia                                                  | Yes, patients were noted to engage in "excessive water intake"                                                                            | Yes, serum Na = ~115 mmol/L                        | Yes, psychiatric comorbidities treated with carbamazepine and diuretics                   | No                                                                                       | No                                 | Yes, 9 months | Yes, adequate detail provided                                                                        | 6 |
| Nardone et al. 2010        | Yes, patient presented to neurology with hyponatraemia                                      | No, unclear                                                                                                                               | Yes, serum Na = 107 mmol/L                         | Yes, schizophrenia treated with clozapine                                                 | No                                                                                       | No                                 | Yes, 4 weeks  | Yes, adequate detail provided                                                                        | 5 |
| Primavera et al. 1995      | Yes, patient presented multiple times with seizures related to hyponatraemia                | Yes, patient consumed "several litres of water daily for some days"                                                                       | Yes, serum Na = 90 mmol/L                          | Yes, diuretics                                                                            | Yes, patient was treated with benzodiazepines, phenobarbital and amitriptyline           | Yes, psychiatric symptoms improved | Yes, 1 year   | Yes, adequate detail provided                                                                        | 8 |
| Shesser et al. 1985        | Yes, patient presented with seizures related to hyponatraemia                               | Yes, it was estimated that the patient consumed more than 29 L of water over 24 hrs                                                       | Yes, serum Na = 105 mmol/L                         | Yes, lithium carbonate and fluphenazine for schizoaffective disorder                      | No                                                                                       | No                                 | No            | Yes, adequate detail provided                                                                        | 5 |
| Emsley et al. 1984         | Yes, patient presented with a seizure related to hyponatraemia                              | Yes, patient was noted to be "drinking large volumes of water"                                                                            | Yes, serum Na = 119 mmol/L                         | Yes, phenobarbitone and hydrochlorothiazide were discontinued                             | Yes, patient was treated with phenytoin                                                  | Yes, psychiatric symptoms improved | Yes, 5 weeks  | Yes, adequate detail provided                                                                        | 8 |
| Katsarou et al. 2010       | Yes, patient presented with a seizure related to hyponatraemia                              | Yes, patient consumed 8-10 L of diet coke/day, 15-20 cups of coffee/day and several cups of water every few minutes                       | Yes, serum Na = 104 mmol/L                         | Yes, risperidone was discontinued                                                         | Yes, patient was treated with phenytoin. Antipsychotic medication was restarted on day 5 | Yes, symptoms resolved             | Yes, 11 days  | Yes, adequate detail provided                                                                        | 8 |
| Nagasawa et al. 2014       | No, patient was found dead                                                                  | Yes, patient consumed large amounts of water                                                                                              | Yes, serum Na = 83 mmol/L and vitreous humor = 113 | Yes, haloperidol, risperidone and olanzapine                                              | No                                                                                       | No                                 | No            | No, patient died                                                                                     | 3 |

|                             |                                                                    |                                                                                                                       | mmol/L right eye and 111 mmol/L left eye |                                                            |                                               |                                                    |                        |                                                                                                        |   |
|-----------------------------|--------------------------------------------------------------------|-----------------------------------------------------------------------------------------------------------------------|------------------------------------------|------------------------------------------------------------|-----------------------------------------------|----------------------------------------------------|------------------------|--------------------------------------------------------------------------------------------------------|---|
| Chen et al. 2016            | Yes, patient experienced intermittent hyponatraemia                | Yes, patient frequently over-consumed water                                                                           | Yes, serum Na = 120 mmol/L               | Yes, first or second generation antipsychotics             | Yes, zotepine, valproate and clonazepam       | Yes, psychiatric symptoms improved                 | Yes, years             | Yes, adequate detail provided                                                                          | 8 |
| Lee et al. 2016             | Yes, patient presented to hospital with hyponatraemia              | Yes, patient consumed several litres of water throughout the day                                                      | Yes, serum Na = 123 mmol/L               | No                                                         | No                                            | No                                                 | No                     | Yes, adequate detail provided                                                                          | 4 |
| Roche et al. 2018           | Yes, patient presented to hospital with hyponatraemia              | Yes, patient consumed 3 L of water daily                                                                              | Yes, serum Na = 119 mmol/L               | Yes, cortisol deficiency                                   | No                                            | No                                                 | No                     | Yes, adequate detail provided                                                                          | 5 |
| Snell et al. 2008           | Yes, patient presented to hospital with hyponatraemia              | Yes, patient consumed > 6 L of water/day                                                                              | Yes, serum Na = 114 mmol/L               | Yes, non-compliant with adrenal replacement therapy        | No                                            | No                                                 | No                     | Yes, adequate detail provided                                                                          | 5 |
| Coler et al. 2012           | Yes, patient presented to hospital with hyponatraemia              | Yes, patient consumed 3 L of water over 9 hrs                                                                         | Yes, serum Na = 120 mmol/L               | Yes, hydrochlorothiazide                                   | No                                            | No                                                 | No                     | Yes, adequate detail provided                                                                          | 5 |
| Ledochowski et al. 1986     | Yes, patient presented to hospital with hyponatraemia              | Yes, patient consumed a large amount of tap water                                                                     | Yes, serum Na = 101 mmol/L               | No                                                         | No                                            | No                                                 | No                     | No, limited detail regarding volume of water consumed                                                  | 3 |
| Itoh et al. 1997            | Yes, patient experienced intermittent hyponatraemia                | Yes, patient displayed continuous water drinking behaviours                                                           | Yes, serum Na = 130 mmol/L               | No                                                         | No                                            | No                                                 | No                     | No, vague details surrounding volume of water, past presentations of hyponatraemia and serum Na values | 3 |
| Salathe et al. 2018         | Yes, patient presented to hospital with hyponatraemia              | Yes, patient stated that she remembered being "very thirsty and drinking lots of water"                               | Yes, serum Na = 122 mmol/L               | Yes, MDMA                                                  | No                                            | No                                                 | No                     | Yes, adequate detail provided                                                                          | 5 |
| Putterman et al. 1993       | Yes, patient presented to hospital with hyponatraemia              | Yes, patient consumed several litres of tap water during his hike and more afterwards                                 | Yes, serum Na = 115 mmol/L               | No                                                         | No                                            | No                                                 | No                     | Yes, adequate detail provided                                                                          | 4 |
| Christenson et al. 1985     | Yes, patient experienced hyponatraemia due to excess water intake  | Yes, patient consumed 1.5-2 L of water over the morning                                                               | Yes, serum Na = 122 mmol/L               | No                                                         | No                                            | No                                                 | No                     | Yes, adequate detail provided                                                                          | 4 |
| Onozaki et al. 2001         | Yes, patient experienced hyponatraemia due to excess water intake  | Yes, patient consumed 20-27 L of water daily                                                                          | Yes, serum Na = 124 mmol/L               | Yes, trichlormethiazide and triamterene                    | No                                            | No                                                 | No                     | Yes, adequate detail provided                                                                          | 5 |
| Mavragani et al. 2005       | Yes, patient experienced hyponatraemia due to excess water intake  | Yes, patient consumed 6 L of water daily                                                                              | Yes, serum Na = 124 mmol/L               | Yes, oxcarbazepine                                         | Yes, trialled on diphenhydantoin              | Yes, polydipsia resolved                           | Yes, 2 weeks           | Yes, adequate detail provided                                                                          | 8 |
| Gutmann et al. 2002         | Yes, patient presented to hospital with hyponatraemia              | Yes, patient consumed 10-12 L of water over 2-3 hrs                                                                   | Yes, serum Na = 123 mmol/L               | No                                                         | No                                            | No                                                 | No                     | No, patient died                                                                                       | 3 |
| Lai et al. 2016             | Yes, patient experienced hyponatraemia due to excess water intake  | Yes, patient consumed 12 L of water within a few hrs                                                                  | Yes, serum Na = 120 mmol/L               | No                                                         | Yes, trialled on risperidone and aripiprazole | Yes, her psychiatric symptoms improved temporarily | No, follow-up was lost | Yes, adequate detail provided                                                                          | 6 |
| Santos-Soares et al. 2008   | Yes, patient presented to hospital with hyponatraemia              | Yes, patient consumed 8 L of water over a few hrs                                                                     | Yes, serum Na = 123 mmol/L               | No                                                         | No                                            | No                                                 | No                     | Yes, adequate detail provided                                                                          | 4 |
| Yalcin-Cakmakli et al. 2010 | Yes, patients both presented to hospital with hyponatraemia        | Yes, patients consumed 5-6 L of water and 3 L of water in 1.5 hrs, respectively                                       | Yes, serum Na = ~124 mmol/L              | Yes, escitalopram                                          | No                                            | No                                                 | No                     | Yes, adequate detail provided                                                                          | 5 |
| Kowalski et al. 2014        | Yes, patients both presented to hospital with hyponatraemia        | Yes, patients over-consumed water                                                                                     | Yes, serum Na = ~118 mmol/L              | No, unclear                                                | No                                            | No                                                 | No                     | No, limited detail regarding volume of water consumed                                                  | 3 |
| Vieweg et al. 1985          | Yes, patient experienced hyponatraemia due to excess water intake  | Yes, patients over-consumed water for many years                                                                      | Yes, serum Na = ~112 mmol/L              | No, unclear                                                | No                                            | No                                                 | No                     | No, limited detail regarding type and volume of fluid, treatment types and treatment outcome           | 3 |
| Yong et al. 2015            | Yes, patients were all admitted to hospital with hyponatraemia     | Yes, patients consumed an abundance of water due to advice from public health warnings                                | Yes, one patient's serum Na = 106 mmol/L | Yes, thiazide diuretics, loop diuretics, spironolactone    | No                                            | No                                                 | No, unclear            | No, limited detail regarding treatment outcomes                                                        | 4 |
| Gillum et al. 1984          | Yes, patient presented to hospital with hyponatraemia              | Yes, patient consumed "copious amounts of tap water"                                                                  | Yes, serum Na = 118 mmol/L               | Yes, lithium carbonate                                     | No                                            | No                                                 | No                     | Yes, adequate detail provided                                                                          | 5 |
| Cheng et al. 1990           | Yes, patients experienced hyponatraemia due to excess water intake | Yes, patients were all observed at some point to have consumed > 400 mL of water per hr beyond their physiologic need | Yes, serum Na = ~110 mmol/L              | Yes, thiazide diuretics and other antipsychotic medication | No                                            | No                                                 | Yes, many years        | Yes, adequate detail provided                                                                          | 6 |
| Issa et al. 1997            | Yes, patients experienced hyponatraemia due to excess water intake | Yes, patient consumed > 6 L of water over 3 hrs                                                                       | Yes, serum Na = 118 mmol/L               | No                                                         | No                                            | No                                                 | No                     | Yes, adequate detail provided                                                                          | 4 |



|                        |                                                                                 |                                                                                                                |                                  |                                                              |                                                                |                                    |                |                                                                                                             |   |
|------------------------|---------------------------------------------------------------------------------|----------------------------------------------------------------------------------------------------------------|----------------------------------|--------------------------------------------------------------|----------------------------------------------------------------|------------------------------------|----------------|-------------------------------------------------------------------------------------------------------------|---|
| Mirvis et al. 2015     | Yes, both patients experienced hyponatraemia due to excess water intake         | Yes, patients consumed 3 L of water per day                                                                    | Yes, serum Na = ~119 mmol/L      | Yes, medication for multiple myeloma (e.g. cyclophosphamide) | No                                                             | No                                 | No             | Yes, adequate detail provided                                                                               | 4 |
| Strachan et al. 2007   | Yes, patient experienced hyponatraemia due to excess water intake               | Yes, patient consumed 10-12 L of water/day                                                                     | Yes, serum Na = 110 mmol/L       | Yes, lithium carbonate, risperidone                          | No                                                             | No                                 | No             | Yes, adequate detail provided                                                                               | 5 |
| Noonan et al. 1977     | Yes, patient experienced hyponatraemia due to excess water intake               | Yes, patient consumed excessive amounts of water straight from the bath faucet                                 | Yes, serum Na = 127 mmol/L       | No, unclear                                                  | No                                                             | No                                 | No             | Yes, adequate detail provided                                                                               | 4 |
| Hayashi et al. 2005    | No, patient was found dead                                                      | Yes, patient was noted to "drink running water excessively"                                                    | Yes, serum Na = 92 mmol/L        | No, unclear                                                  | No                                                             | No                                 | No             | No, limited detail regarding volume of water consumed or whether cause of death was even water intoxication | 2 |
| Vanhaebost et al. 2018 | No, patient was found dead                                                      | Yes, patient was seen compulsively drinking water                                                              | Yes, vitreous humor = 117 mmol/L | Yes, paliperidone, aripiprazole, venlafaxine                 | No                                                             | No                                 | No             | No, patient died                                                                                            | 3 |
| Cronin 1987            | Yes, patients experienced hyponatraemia due to excess water intake              | Yes, patients drank large quantities of water (10-12 gallons/day)                                              | Yes, serum Na = ~108 mmol/L      | No, unclear                                                  | No                                                             | No                                 | No             | Yes, adequate detail provided                                                                               | 4 |
| Bremner et al. 1991    | Yes, patients experienced hyponatraemia due to excess water intake              | Yes, patients drank excessively                                                                                | Yes, serum Na = ~121 mmol/L      | Yes, carbamazepine, haloperidol                              | Yes, demeclocycline and flupenthixole                          | Yes, psychiatric symptoms improved | No, unclear    | Yes, adequate detail provided                                                                               | 7 |
| Grainger et al. 1992   | Yes, patient experienced hyponatraemia due to excess water intake               | Yes, 4 L over 12 hrs                                                                                           | Yes, serum Na = 109 mmol/L       | Yes, non-compliance with haloperidol                         | Yes, haloperidol was discontinued and chlorpromazine commenced | Yes, psychiatric symptoms improved | Yes, 18 days   | Yes, adequate detail provided                                                                               | 8 |
| Peh et al. 1990        | Yes, patient experienced hyponatraemia due to excess water intake               | Yes, 9 patients consumed around 3 L/day                                                                        | Yes, serum Na = ~120 mmol/L      | Yes, antipsychotic medication                                | No, unclear                                                    | No                                 | No, unclear    | No, limited detail regarding treatment types and outcomes                                                   | 4 |
| Ismail et al. 2010     | Yes, patient experienced hyponatraemia due to excess water intake               | Yes, patient significantly increased his water intake                                                          | Yes, serum Na = 125 mmol/L       | Yes, varenicline                                             | Yes, discontinuation of varenicline                            | Yes, psychiatric symptoms improved | Yes, 5 weeks   | Yes, adequate detail provided                                                                               | 8 |
| Prim 1988              | Yes, patient experienced hyponatraemia due to excess water intake               | Yes, patient drank > 20 cups of water/day                                                                      | Yes, serum Na = 123 mmol/L       | Yes, haloperidol                                             | Yes, reduction in haloperidol                                  | Yes, psychiatric symptoms improved | Yes, 5 months  | Yes, adequate detail provided                                                                               | 8 |
| Lin et al. 2011        | Yes, patient experienced hyponatraemia due to excess water intake               | Yes, patient drank > 10 bottles of water/day (1500 mL/bottle)                                                  | Yes, serum Na = 112 mmol/L       | Yes, poor compliance with antipsychotic medication           | No                                                             | No                                 | No             | Yes, adequate detail provided                                                                               | 5 |
| Peh et al. 1990        | Yes, patient experienced hyponatraemia due to excess water intake               | Yes, patient drank tap water excessively                                                                       | Yes, serum Na = 109 mmol/L       | Yes, fluphenazine, chlorpromazine                            | Yes, trifluoperazine, benzhexol                                | No, unclear                        | Yes, 5 months  | No, patient died                                                                                            | 6 |
| Finkel 2004            | Yes, patient presented for evaluation of a urine sample                         | Yes, patient consumed 6-8 L of water/day                                                                       | Yes, serum Na = 124 mmol/L       | Yes, fat-burning pills                                       | No                                                             | No                                 | No             | No, limited detail regarding treatment types and outcomes                                                   | 4 |
| Finlayson et al. 1989  | Yes, patient was admitted to hospital following complaints of abdominal burning | Yes, patient consumed 5-10 L of water/day                                                                      | Yes, serum Na = 106 mmol/L       | Yes, antidepressants, neuroleptics                           | Yes, lithium, isocobaxid, L-tryptophan                         | Yes, psychiatric symptoms improved | Yes, 5 weeks   | Yes, adequate detail provided                                                                               | 8 |
| Howe et al. 1983       | Yes, patient was admitted to hospital with hyponatraemia                        | Yes, patient consumed water directly from 2 L jugs and also drank his own bath water                           | Yes, serum Na = 125 mmol/L       | No, unclear                                                  | Yes, phenytoin and haloperidol                                 | No                                 | No, unclear    | No, patient remained hyponatraemic                                                                          | 4 |
| Koczapski et al. 1989  | Yes, patients all experienced hyponatraemia due to excess water intake          | Yes, patient's fluid intake ranged from 6.2-21.7 L/day                                                         | Yes, serum Na = ~127 mmol/L      | Yes, neuroleptics                                            | No                                                             | No                                 | No             | No, unclear                                                                                                 | 4 |
| Kato et al. 2008       | Yes, patient presented to outpatient clinic with hyponatraemia                  | Yes, patient consumed > 2 L of fluid in the 12 hrs prior to readmission                                        | Yes, serum Na = 108 mmol/L       | Yes, low-dose CY                                             | Yes, discontinuation of CY                                     | Yes, hyponatraemia resolved        | Yes, > 2 years | Yes, adequate detail provided                                                                               | 8 |
| Windpessl et al. 2017  | Yes, patient presented to hospital with hyponatraemia                           | Yes, patient consumed 4 L of tea and water within 2 hrs                                                        | Yes, serum Na = 122 mmol/L       | Yes, diclofenac                                              | No                                                             | No                                 | No             | Yes, adequate detail provided                                                                               | 5 |
| Kushnir et al. 1990    | Yes, patient presented to hospital in a coma due to hyponatraemia               | Yes, patient consumed water frequently and on the day of admission could not be separated from the garden hose | Yes, serum Na = 120 mmol/L       | Yes, non-compliance with haloperidol and artane              | No                                                             | No                                 | No             | No, patient died                                                                                            | 4 |
| Korzets et al. 1996    | Yes, patient was admitted to ICU in a coma due to hyponatraemia                 | Yes, patient's mother reported patient drinking excessively                                                    | Yes, serum Na = 109 mmol/L       | Yes, fluphenazine, perphenazine                              | No                                                             | No                                 | Yes, 12 days   | Yes, adequate detail provided                                                                               | 6 |
| Caputo et al. 2001     | Yes, patient presented to hospital with semi-consciousness due to hyponatraemia | Yes, patient consumed 4-5 L of water + 120-144 g of alcohol per day                                            | Yes, serum Na = 95 mmol/L        | Yes, theophylline, ace-inhibitors, diuretics, alprazolam     | No                                                             | No                                 | No             | Yes, adequate detail provided                                                                               | 5 |

|                          |                                                                                                                                       |                                                                                 |                                                            |                                                                             |                                                                            |                                                      |                                         |                               |   |
|--------------------------|---------------------------------------------------------------------------------------------------------------------------------------|---------------------------------------------------------------------------------|------------------------------------------------------------|-----------------------------------------------------------------------------|----------------------------------------------------------------------------|------------------------------------------------------|-----------------------------------------|-------------------------------|---|
| Inoue et al. 1985        | Yes, patients all experienced hyponatraemia due to excess water intake                                                                | Yes, patients were all observed to drink water excessively                      | Yes, serum Na = ~120 mmol/L                                | Yes, psychotherapeutic medications                                          | Yes, discontinuation of baclofen and additional administration of pimozide | Yes, hyponatraemia worsened                          | Yes, years                              | Yes, adequate detail provided | 8 |
| Beresford 1970           | Yes, patients were admitted to hospital with hyponatraemia                                                                            | Yes, patients consumed copious amounts of water                                 | Yes, serum Na = ~115 mmol/L                                | Yes, thioridazine hydrochloride, hydrochlorothiazide                        | No                                                                         | No                                                   | No                                      | Yes, adequate detail provided | 5 |
| Goldman et al. 1988      | Yes, patients all experienced hyponatraemia in the past due to excess water intake                                                    | Yes, patients all had a history of excessive drinking                           | Yes, serum Na = ~133 mmol/L                                | Yes, chlorpromazine, other neuroleptics                                     | No                                                                         | No                                                   | No, unclear                             | Yes, adequate detail provided | 5 |
| Gleadhill et al. 1982    | Yes, all patients were admitted to hospital with hyponatraemia                                                                        | Yes, patients drank excessively                                                 | Yes, serum Na = ~115 mmol/L                                | Yes, antipsychotic medication (thioxanthene, phenothiazine)                 | No, unclear                                                                | No                                                   | No, unclear                             | Yes, adequate detail provided | 5 |
| Shapira et al. 1988      | Yes, patient presented to hospital with hyponatraemia                                                                                 | Yes, patient drank 4 L overnight                                                | Yes, serum Na = 119 mmol/L                                 | No                                                                          | No                                                                         | No                                                   | No                                      | Yes, adequate detail provided | 4 |
| Basnyat et al. 2000      | Yes, patient presented to hospital with hyponatraemia                                                                                 | Yes, patient consumed 10 L/day                                                  | Yes, serum Na = 122 mmol/L                                 | Yes, valproate                                                              | No                                                                         | No                                                   | No                                      | Yes, adequate detail provided | 5 |
| Bhananker et al. 2004    | Yes, patient presented to hospital with hyponatraemia                                                                                 | Yes, patient consumed 4 L of water before surgery and 6 L after                 | Yes, serum Na = 120 mmol/L                                 | Yes, benzodiazepines                                                        | No                                                                         | No                                                   | No                                      | Yes, adequate detail provided | 5 |
| Vieweg et al. 1984       | Yes, patients all experienced intermittent hyponatraemia due to excess water intake                                                   | Yes, patients consumed on average 25 L/day                                      | Yes, serum Na = ~115 mmol/L                                | Yes, haloperidol                                                            | Yes, increased doses                                                       | No                                                   | Yes, years                              | Yes, adequate detail provided | 7 |
| DiMaio et al. 1980       | No, patient was found dead                                                                                                            | Yes, patient consumed large quantities of water                                 | Yes, serum Na = 110 mmol/L and vitreous humor = 115 mmol/L | Yes, haloperidol, trihexyphenidyl                                           | No                                                                         | No                                                   | No                                      | No, patient died              | 4 |
| Lydakos et al. 2005      | Yes, patient presented to hospital with hyponatraemia due to excess water intake                                                      | Yes, patient consumed 9-12 L of water/day                                       | Yes, serum Na = 110 mmol/L                                 | Yes, NSAIDs, verapamil hydrochloride                                        | Yes, trialled on risperidone and benzodiazepines                           | No, unclear                                          | Yes, 2 follow-ups conducted within 1 yr | No, patient died              | 6 |
| Pupic-Bakrac et al. 2017 | Yes, patient presented to hospital with hyponatraemia due to excess water intake                                                      | Yes, patient consumed large amounts of water                                    | Yes, serum Na = 98 mmol/L                                  | Yes, schizophrenia treated with carbamazepine, haloperidol etc.             | No                                                                         | Yes, symptoms improved with neuropsychiatric therapy | No, unclear                             | Yes, adequate detail provided | 6 |
| Mukherjee et al. 2005    | Yes, patient presented to hospital unconscious from water intoxication                                                                | Yes, patient drank large quantities of water                                    | Yes, serum Na = 108 mmol/L                                 | No                                                                          | Yes, venlafaxine, then quetiapine                                          | Yes, mental status improved                          | No                                      | Yes, adequate detail provided | 6 |
| Solomon et al. 2019      | Yes, patients both presented to hospital with hyponatraemia                                                                           | Yes, patients drank excessive amounts of water to deal with contractions        | Yes, serum Na = ~119 mmol/L                                | No                                                                          | No                                                                         | No                                                   | No                                      | Yes, adequate detail provided | 4 |
| Vishwajeet et al. 2005   | Yes, patient presented to hospital with hyponatraemia due to excess water intake                                                      | Yes, patient drank around 6 L of fluid over 4 hrs                               | Yes, serum Na = 119 mmol/L                                 | No                                                                          | No                                                                         | No                                                   | No, unclear                             | Yes, adequate detail provided | 4 |
| Goldman et al. 1985      | Yes, patients were all inpatients at a psychiatric facility and had all experienced hyponatraemic episodes due to excess water intake | Yes, patients were identified by staff as compulsive water drinkers             | Yes, serum Na = ~127 mmol/L                                | Yes, schizophrenia treated with neuroleptics and anticholinergic medication | Yes, demeclocycline                                                        | Yes, hyponatraemic episodes reduced                  | No, unclear                             | Yes, adequate detail provided | 7 |
| Chen et al. 2014         | Yes, patient presented to emergency with hyponatraemia                                                                                | Yes, patients drank 4 L of water over several hrs                               | Yes, serum Na = 120 mmol/L                                 | No                                                                          | No                                                                         | No                                                   | No                                      | Yes, adequate detail provided | 4 |
| Yonemura et al. 1987     | Yes, patient presented to hospital with hyponatraemia                                                                                 | Yes, patient drank 10-15 L of water/day                                         | Yes, serum Na = 117 mmol/L                                 | No                                                                          | No                                                                         | No                                                   | No                                      | No, unclear                   | 3 |
| Nolte et al. 2019        | Yes, patient experienced hyponatraemia due to excess water intake                                                                     | Yes, patient drank 800 mL of water/hr for ~8 hrs (6.4L over 8 hrs)              | Yes, serum Na = 134 mmol/L                                 | No                                                                          | No                                                                         | No                                                   | No                                      | No, unclear                   | 3 |
| Farrell et al. 2003      | No, patient was found dead                                                                                                            | Yes, patient drank 30-40 glasses of water the night before her death            | Yes, vitreous humor = 92 mmol/L                            | No                                                                          | No                                                                         | No                                                   | No                                      | No, patient died              | 2 |
| Losonczy et al. 2016     | Yes, patient experienced hyponatraemia due to excess water intake                                                                     | Yes, patient drank 4-5 L of water over several hrs                              | Yes, serum Na = 114 mmol/L                                 | No                                                                          | No                                                                         | No                                                   | No                                      | Yes, adequate detail provided | 4 |
| Sarvesvaran 1984         | Yes, patient experienced hyponatraemia due to excess water intake                                                                     | Yes, patient drank plenty of water following the accidental ingestion of bleach | Yes, serum Na = 111 mmol/L                                 | No                                                                          | No                                                                         | No                                                   | No                                      | No, patient died              | 3 |

|                          |                                                                                           |                                                                                                              |                             |                                                                                          |                                              |                                                            |               |                                                                            |   |
|--------------------------|-------------------------------------------------------------------------------------------|--------------------------------------------------------------------------------------------------------------|-----------------------------|------------------------------------------------------------------------------------------|----------------------------------------------|------------------------------------------------------------|---------------|----------------------------------------------------------------------------|---|
| Cicognani et al. 2013    | Yes, patient experienced hyponatraemia due to excess water intake                         | Yes, patient was a compulsive water drinker                                                                  | Yes, serum Na = 112 mmol/L  | Yes, psychogenic polydipsia and anxiety                                                  | No                                           | Yes, low dose of citalopram controlled anxiety             | Yes, 1 week   | Yes, adequate detail provided                                              | 7 |
| Hanihara et al. 1997     | Yes, patients experienced hyponatraemia due to excess water intake                        | Yes, patients were all compulsive water drinkers                                                             | Yes, serum Na = ~121 mmol/L | Yes, schizophrenia treated with neuroleptics                                             | No                                           | No                                                         | No            | Yes, adequate detail provided                                              | 5 |
| Santonastaso et al. 1998 | Yes, patient presented to emergency with hyponatraemia                                    | Yes, patient consumed 6 L of water the day before weighing to maintain her target weight                     | Yes, serum Na = 113 mmol/L  | Yes, anorexia nervosa treated with haloperidol                                           | No                                           | No                                                         | No            | Yes, adequate detail provided                                              | 5 |
| Ramirez et al. 1993      | Yes, patient presented to hospital with hyponatraemia due to excess water intake          | Yes, patient consumed 2-3 gallons of water/day                                                               | Yes, serum Na = 111 mmol/L  | No                                                                                       | Yes, gamma-aminobutyric acid analog baclofen | Yes, reduction in compulsive drinking                      | Yes, 8 months | Yes, adequate detail provided                                              | 7 |
| Kott et al. 1985         | Yes, patient presented to emergency with hyponatraemia                                    | Yes, patient consumed 30 glasses of water, one after the other                                               | Yes, serum Na = 127 mmol/L  | No                                                                                       | No                                           | No                                                         | No            | Yes, adequate detail provided                                              | 4 |
| Zilles et al. 2010       | Yes, patient experienced hyponatraemia due to excess water intake                         | Yes, patient consumed 3 L of mineral water within 30 minutes                                                 | Yes, serum Na = 112 mmol/L  | Yes, schizophrenia treated with quetiapine and lorazepam                                 | Yes, trialled on olanzapine                  | No, unclear                                                | No            | Yes, adequate detail provided                                              | 6 |
| Tenyi et al. 2006        | Yes, patient presented to hospital with hyponatraemia due to excess water intake          | Yes, patient was a compulsive water drinker                                                                  | Yes, serum Na = 113 mmol/L  | Yes, schizophrenia treated with clozapine                                                | Yes, trialled on olanzapine                  | Yes, symptoms resolved and no recurrence of rhabdomyolysis | Yes, 6 months | Yes, adequate detail provided                                              | 8 |
| Mor et al. 1987          | Yes, patient presented to hospital with hyponatraemia due to excess water intake          | Yes, patient drank an excessive amount of water due to feeling unusually thirsty                             | Yes, serum Na = 119 mmol/L  | Yes, depression treated with levomepromazine and oxazepam                                | No                                           | No                                                         | No            | Yes, adequate detail provided                                              | 5 |
| Johansson et al. 2002    | Yes, patients experienced hyponatraemia due to excess water intake                        | Yes, patients drank several litres of water and juice/ > 8 L of water over 23 hrs                            | Yes, serum Na = 122 mmol/L  | Yes, oxytocin during labour                                                              | No                                           | No                                                         | No            | No, limited detail regarding treatment types and outcomes                  | 4 |
| Goldman et al. 1994      | Yes, patients experienced hyponatraemia due to excess water intake                        | Yes, patients drank ~4.9 L of water/day                                                                      | Yes, serum Na = 132 mmol/L  | Yes, schizophrenia treated with chlorpromazine, lithium and clonazepam                   | No                                           | No                                                         | No            | Yes, adequate detail provided                                              | 5 |
| Raskind 1974             | Yes, patient presented to hospital with hyponatraemia due to excess water intake          | Yes, patient drank copious amounts and spent most of her time in the bathroom or by the water fountain       | Yes, serum Na = 111 mmol/L  | Yes, schizophrenia and depression. On hydroflumethiazide, thioridazine and hydrochloride | No                                           | No                                                         | No            | No, patient died                                                           | 4 |
| Musch et al. 2003        | Yes, patients all experienced hyponatraemia due to excess water intake                    | Yes, patients drank > 4 L of either water or beer/day                                                        | Yes, serum Na = ~126 mmol/L | No                                                                                       | No                                           | No                                                         | No            | Yes, adequate detail provided                                              | 4 |
| Mercier-Guidez 1998      | Yes, patient experienced hyponatraemia due to excess water intake                         | Yes, patient drank up to 13 L of fluids/day                                                                  | Yes, serum Na = ~110 mmol/L | Yes, schizophrenia treated with neuroleptics                                             | No                                           | No                                                         | Yes, 6 months | Yes, adequate detail provided                                              | 6 |
| Gopal et al. 2000        | Yes, patient presented to hospital with hyponatraemia due to excess water intake          | Yes, patient drank several litres + another 3 L over 1 hr in preparation for a pelvic ultrasound examination | Yes, serum Na = 118 mmol/L  | No                                                                                       | No                                           | No                                                         | No            | Yes, adequate detail provided                                              | 4 |
| Moshiri et al. 2014      | Yes, patient presented with hyponatraemia related to excess water intake                  | Yes, patient began drinking excessive amounts of water after her physician told her it was beneficial        | Yes, serum Na = 122 mmol/L  | Yes, quetiapine, hydrochlorothiazides                                                    | Yes, discontinuation of hydrochlorothiazide  | Yes, improvement in hyponatraemia                          | No, unclear   | Yes, adequate detail provided                                              | 7 |
| Lightenberg et al. 1998  | Yes, patient was admitted to hospital with hyponatraemia related to excess water intake   | Yes, patient drank > 6 L over several hrs                                                                    | Yes, serum Na = 114 mmol/L  | No                                                                                       | No                                           | No                                                         | No            | No, patient died                                                           | 3 |
| Gardner 2002             | Yes, patients all presented to hospital with hyponatraemia related to excess water intake | Yes, patients drank 20 quarts/6 canteens/1 gallon of water                                                   | Yes, serum Na = ~120 mmol/L | No                                                                                       | No                                           | No                                                         | No            | No, patients died + no detail regarding treatment for patient who survived | 3 |
| Kipps et al. 2011        | Yes, patients developed hyponatraemia post-marathon                                       | Yes, patients drank around 843 mL of water or sports drink/hr                                                | Yes, serum Na = ~132 mmol/L | No                                                                                       | No                                           | No                                                         | No            | No, limited detail regarding treatment types and outcomes                  | 3 |
| Tilley et al. 2011       | Yes, patient developed hyponatraemia due to excess water intake                           | Yes, patient drank around 14 L of water within 3 hrs                                                         | Yes, serum Na = 122 mmol/L  | No                                                                                       | No                                           | No                                                         | No            | Yes, adequate detail provided                                              | 4 |
| Hariprasad et al. 1980   | Yes, patients all experienced hyponatraemia due to excess water intake                    | Yes, patients drank around 7-43 L of fluid/day                                                               | Yes, serum Na = ~111 mmol/L | Yes, antipsychotic medication                                                            | Yes, increased doses                         | Yes, psychiatric symptoms improved                         | No            | Yes, adequate detail provided                                              | 7 |

|                            |                                                                                         |                                                                                            |                             |                                                                                                   |                                                                       |                                        |               |                                             |   |
|----------------------------|-----------------------------------------------------------------------------------------|--------------------------------------------------------------------------------------------|-----------------------------|---------------------------------------------------------------------------------------------------|-----------------------------------------------------------------------|----------------------------------------|---------------|---------------------------------------------|---|
| Noakes et al. 2004         | Yes, patient experienced hyponatraemia due to excess water intake                       | Yes, patient drank as much as possible + 750 mL/hr during the cycling leg                  | Yes, serum Na = 127 mmol/L  | No                                                                                                | No                                                                    | No                                     | No            | Yes, adequate detail provided               | 4 |
| Oh et al. 2018             | Yes, patients experienced hyponatraemia due to excess water intake                      | Yes, patients drank 4.5-6 quarts of water in 2-2.5 hrs                                     | Yes, serum Na = ~128 mmol/L | No                                                                                                | No                                                                    | No                                     | No            | Yes, adequate detail provided               | 4 |
| Tanneau et al. 1993        | Yes, patients experienced hyponatraemia due to excess water intake                      | Yes, patients were either compulsive water drinkers, or drank persistently                 | Yes, serum Na = ~110 mmol/L | Yes, thiazide diuretics, spironolactone                                                           | No                                                                    | No                                     | No            | Yes, adequate detail provided               | 5 |
| Madero et al. 2015         | Yes, patient presented to hospital with hyponatraemia due to excess water intake        | Yes, patient drank a significant amount of water while on a flight                         | Yes, serum Na = 116 mmol/L  | Yes, thiazide diuretics                                                                           | No                                                                    | No                                     | No            | Yes, adequate detail provided               | 5 |
| Rosenbaum et al. 1979      | Yes, patients presented to hospital with hyponatraemia due to excess water intake       | Yes, patients drank significant amounts of water (20 glasses/drinking from shower heads)   | Yes, serum Na = ~112 mmol/L | Yes, thioridazine and other psychotropic medications                                              | No                                                                    | No                                     | No            | Yes, adequate detail provided               | 5 |
| Garigan et al. 1999        | Yes, patient presented to hospital in acute respiratory distress due to hyponatraemia   | Yes, patient drank ~20 quarts of water within 4 hrs                                        | Yes, serum Na = 115 mmol/L  | No                                                                                                | No                                                                    | No                                     | No            | No, patient died                            | 3 |
| Sjoblom et al. 1997        | Yes, patient presented to emergency with hyponatraemia due to excess water intake       | Yes, patient drank directly from the tap for 3-4 hrs                                       | Yes, serum Na = 106 mmol/L  | No                                                                                                | No                                                                    | No                                     | No            | No, patient died                            | 3 |
| Ellinas et al. 1993        | Yes, patients were all admitted to hospital with hyponatraemia and polydipsia           | Yes, patients were all compulsive water drinkers (except 1 who was a chronic alcoholic)    | Yes, serum Na = ~115 mmol/L | Yes, neuroleptics                                                                                 | No                                                                    | No                                     | No            | Yes, adequate detail provided               | 5 |
| Cosgray et al. 1990        | Yes, patient was transferred to hospital following a hyponatraemia-induced seizure      | Yes, patient made frequent trips to the water fountain                                     | Yes, serum Na = 103 mmol/L  | No, unclear                                                                                       | No                                                                    | No                                     | No            | Yes, adequate detail provided               | 4 |
| Rao et al. 2011            | Yes, patient presented with hyponatraemia related to excess water intake                | Yes, patient drank around 8 L of water/day                                                 | Yes, serum Na = 123 mmol/L  | Yes, discontinuation of antipsychotic medication                                                  | Yes, trialled on risperidone and trihexyphenidyl                      | Yes, psychiatric symptoms improved     | Yes, 6 weeks  | Yes, adequate detail provided               | 8 |
| Radojevic et al. 2012      | Yes, patient presented to emergency with symptoms of hyponatraemia                      | Yes, patient drank excessive amounts of water                                              | Yes, serum Na = ~105 mmol/L | Yes, schizophrenia treated with neuroleptic                                                       | No                                                                    | No                                     | No            | No, patients died                           | 4 |
| McDaniel et al. 2010       | Yes, patients suffered from psychiatric illnesses and intermittent hyponatraemia        | Yes, patients all consumed large amounts of water                                          | Yes, serum Na = ~123 mmol/L | Yes, bipolar disorder and depression treated with lithium, fluphenazine, fluoxetine and lorazepam | Yes, resuming regular doses of lithium and increasing lorazepam doses | Yes, psychiatric symptoms improved     | No            | Yes, adequate detail provided               | 7 |
| Chen et al. 2006           | Yes, patient presented to hospital with hyponatraemia due to excess water intake        | Yes, patient consumed 6 L of water in preparation for a colonoscopy                        | Yes, serum Na = 118 mmol/L  | No                                                                                                | No                                                                    | No                                     | No            | Yes, adequate detail provided               | 4 |
| Iwazu et al. 2007          | Yes, patient presented to hospital with symptoms of hyponatraemia                       | Yes, patient consumed 6 L of water and Japanese tea/day to ease throat discomfort          | Yes, serum Na = 123 mmol/L  | No                                                                                                | No                                                                    | No                                     | No            | Yes, adequate detail provided               | 4 |
| Speedy et al. 2000         | Yes, patients experienced mild hyponatraemia due to excess fluid intake                 | Yes, patients consumed around 9.5 L of fluids throughout the course of the race (12.6 hrs) | Yes, serum Na = 131 mmol/L  | No                                                                                                | No                                                                    | No                                     | No            | Yes, adequate detail provided               | 4 |
| Shevitz et al. 1980        | Yes, patient presented to hospital with hyponatraemia due to excess water intake        | Yes, patient consumed around 15 quarts of water/day                                        | Yes, serum Na = 114 mmol/L  | No, unclear                                                                                       | Yes, thioridazine and propranolol                                     | Yes, her psychiatric symptoms improved | No            | Yes, adequate detail provided               | 6 |
| Tolan et al. 2001          | Yes, patients presented with hyponatraemia related to excess water intake               | Yes, patients consumed 10 glasses of water/day and 3 L after drinking alcohol              | Yes, serum Na = ~110 mmol/L | Yes, olanzapine and sertraline                                                                    | Yes, medication discontinued. Trialled on clozapine                   | Yes, hyponatraemia resolved            | No            | Yes, adequate detail provided               | 7 |
| Penders et al. 2015        | Yes, patient presented to emergency with altered mental status related to hyponatraemia | Yes, patient consumed 8 L of water/day                                                     | Yes, serum Na = 101 mmol/L  | Yes, schizoaffective disorder treated with antipsychotic medication                               | Yes, discontinuation of clozapine                                     | Yes, psychiatric symptoms improved     | Yes, 3 months | Yes, adequate detail provided               | 8 |
| Olapade-Olaopa et al. 1997 | Yes, patients presented with hyponatraemia related to excess water intake               | Yes, patients consumed 7 L of fluid in 6 hrs, and 15-18 L of fluid in 24 hrs, respectively | Yes, serum Na = ~115 mmol/L | No                                                                                                | No                                                                    | No                                     | No            | No, limited detail regarding treatment type | 3 |

|                           |                                                                                                           |                                                                                     |                             |                                                                     |                                                                                                          |                                               |                |                                                           |   |
|---------------------------|-----------------------------------------------------------------------------------------------------------|-------------------------------------------------------------------------------------|-----------------------------|---------------------------------------------------------------------|----------------------------------------------------------------------------------------------------------|-----------------------------------------------|----------------|-----------------------------------------------------------|---|
| Funayama et al. 2011      | Yes, patient was admitted to hospital with mild disorientation related to hyponatraemia                   | Yes, patient consumed > 10 L of water/day                                           | Yes, serum Na = 100 mmol/L  | Yes, schizophrenia treated with haloperidol                         | Yes, discontinuation of haloperidol                                                                      | Yes, hyponatraemia and symptoms both resolved | Yes, 2 years   | Yes, adequate detail provided                             | 8 |
| Fleischhacker et al. 1987 | Yes, patient was admitted following vomiting and a seizure related to hyponatraemia                       | Yes, patient was found drinking large quantities of water from the washbasin        | Yes, serum Na = 101 mmol/L  | Yes, schizophrenia treated with neuroleptics                        | Yes, discontinuation of neuroleptics                                                                     | No, unclear                                   | Yes, 16 days   | Yes, adequate detail provided                             | 7 |
| Bayir et al. 2012         | Yes, patient was admitted with altered consciousness related to hyponatraemia                             | Yes, patient consumed 12 L of tap water in 4 hrs                                    | Yes, serum Na = 107 mmol/L  | No                                                                  | No                                                                                                       | No                                            | No             | Yes, adequate detail provided                             | 4 |
| Weiss 2004                | Yes, patient presented with hyponatraemia related to excess water intake                                  | Yes, patient consumed up to 8 L of water/day                                        | Yes, serum Na = 116 mmol/L  | Yes, hydrochlorothiazide                                            | Yes, discontinuation of hydrochlorothiazide                                                              | Yes, hyponatraemia resolved                   | Yes, months    | Yes, adequate detail provided                             | 8 |
| Diamond et al. 2003       | Yes, patient presented with symptomatic hyponatraemia related to excess water intake                      | Yes, patient consumed 5 gallons of water over a few hrs                             | Yes, serum Na = 114 mmol/L  | Yes, arbutin                                                        | No                                                                                                       | No                                            | No             | Yes, adequate detail provided                             | 5 |
| Su et al. 2012            | Yes, patient presented with confusion and difficulty speaking secondary to hyponatraemia                  | Yes, patient consumed 3 L of water over 4 hrs                                       | Yes, serum Na = 114 mmol/L  | Yes, tricyclic antidepressant therapy                               | Yes, discontinuation of mirtazapine and ramipril                                                         | No, unclear                                   | No             | Yes, adequate detail provided                             | 6 |
| Leban et al. 2016         | Yes, patient presented to emergency with hyponatraemia related to excess water intake                     | Yes, patient consumed 6 L over ~9 hrs                                               | Yes, serum Na = 116 mmol/L  | No                                                                  | No                                                                                                       | No                                            | No             | Yes, adequate detail provided                             | 4 |
| Kawashima et al. 2015     | No, patients were found dead                                                                              | Yes, patients repeatedly consumed considerable amounts of water                     | Yes, serum Na = ~104 mmol/L | Yes, antipsychotic medication                                       | No                                                                                                       | No                                            | No             | No, patients died                                         | 3 |
| Kruse 1993                | Yes, patient presented to emergency with hyponatraemia related to excess water intake                     | Yes, patient had psychogenic polydipsia and walked frequently to the water fountain | Yes, serum Na = 124 mmol/L  | Yes, lithium, chlorpromazine                                        | No                                                                                                       | No                                            | No             | No, limited detail regarding treatment types and outcomes | 4 |
| Cosgray et al. 1993       | Yes, all patients had a history of hyponatraemia related to excess water intake                           | Yes, patients engaged in excessive water drinking behaviours                        | Yes, serum Na = ~124 mmol/L | Yes, neuroleptics                                                   | No                                                                                                       | No                                            | No             | Yes, adequate detail provided                             | 5 |
| Cortezoso et al. 2014     | Yes, patient presented with hyponatraemia related to excess water intake                                  | Yes, patient had a high water intake for 3 days before presentation                 | Yes, serum Na = 123 mmol/L  | Yes, acyclovir                                                      | Yes, discontinued acyclovir and trialled on acetylsalicylic acid, atorvastatin, amlodipine and enalapril | Yes, hyponatraemia resolved                   | No             | Yes, adequate detail provided                             | 7 |
| Thomas et al. 2001        | Yes, patient presented with intractable hiccups and a history of hyponatraemia due to excess water intake | Yes, patient consumed around 10 L of water/day                                      | Yes, serum Na = ~105 mmol/L | Yes, propranolol, clonidine, chlorpromazine                         | No                                                                                                       | No                                            | Yes, 8 weeks   | Yes, adequate detail provided                             | 6 |
| Scotney et al. 2015       | Yes, patient developed hyponatraemia due to excess water intake                                           | Yes, patient consumed around 5.3 L of water and electrolyte solution in ~11 hrs     | Yes, serum Na = 132 mmol/L  | Yes, NSAIDs                                                         | No                                                                                                       | No                                            | No             | No, limited detail regarding treatment types and outcomes | 4 |
| Nixon et al. 1982         | Yes, patient experienced chronic hyponatraemia caused by excessive water intake                           | Yes, patient consumed 10-15 L/day                                                   | Yes, serum Na = ~115 mmol/L | Yes, haloperidol, benzotropine                                      | Yes, trialled on demeclocycline                                                                          | Yes, hyponatraemia reduced                    | Yes, ~20 weeks | Yes, adequate detail provided                             | 8 |
| Chong et al. 1997         | Yes, all patients had a history of hyponatraemia related to excess water intake                           | Yes, patients consumed "excessive amounts" of fluids                                | Yes, serum Na = ~125 mmol/L | Yes, neuroleptics                                                   | No                                                                                                       | No                                            | No             | No, limited detail regarding treatment types and outcomes | 4 |
| Goldman 1999              | Yes, patient had a history of symptomatic hyponatraemia related to excess water intake                    | Yes, patient consumed ~9-15 L of fluids/day                                         | Yes, serum Na = ~115 mmol/L | Yes, trifluoperazine, benzotropine                                  | Yes, trialled on cortisol                                                                                | No                                            | Yes, 4 weeks   | Yes, adequate detail provided                             | 7 |
| Moskowitz 1992            | Yes, patient had a history of symptomatic hyponatraemia related to excess water intake                    | Yes, patient consumed 7 L of fluids/day                                             | Yes, serum Na = 115 mmol/L  | Yes, haloperidol, benzotropine mesylate                             | No                                                                                                       | No                                            | Yes, 66 months | Yes, adequate detail provided                             | 6 |
| Simmons et al. 2007       | Yes, patient experienced hyponatraemia due to excess water intake                                         | Yes, patient consumed 2-3 gallons of water/day                                      | Yes, serum Na = 118 mmol/L  | Yes, depression treated with sertraline, divalproex and lamotrigine | No                                                                                                       | No                                            | No             | Yes, adequate detail provided                             | 5 |
| Lipsky et al. 1987        | Yes, patient experienced hyponatraemia due to excess water intake                                         | Yes, patient consumed 1350 mL over 1-2 hrs                                          | Yes, serum Na = 123 mmol/L  | No                                                                  | No                                                                                                       | No                                            | No             | Yes, adequate detail provided                             | 4 |

|                        |                                                                                              |                                                                                                    |                             |                                          |                                                                                              |                                               |               |                                                           |   |
|------------------------|----------------------------------------------------------------------------------------------|----------------------------------------------------------------------------------------------------|-----------------------------|------------------------------------------|----------------------------------------------------------------------------------------------|-----------------------------------------------|---------------|-----------------------------------------------------------|---|
| Looi et al. 1995       | Yes, patient experienced hyponatraemia due to excess water intake                            | Yes, patient consumed 16 L of water/day                                                            | Yes, serum Na = 120 mmol/L  | Yes, clonazepam, lithium, chlorpromazine | Yes, all psychotropic medication discontinued. Then clonazepam re-introduced                 | Yes, psychiatric symptoms improved            | Yes, 13 days  | Yes, adequate detail provided                             | 8 |
| Shiwach 1996           | Yes, patient presented with hyponatraemia related to excess water intake                     | Yes, patient consumed 4 L over 2 hrs                                                               | Yes, serum Na = 118 mmol/L  | No                                       | No                                                                                           | No                                            | No            | Yes, adequate detail provided                             | 4 |
| Whitchurch et al. 2011 | Yes, patient presented with hyponatraemia related to excess water intake                     | Yes, patient consumed several litres/day                                                           | Yes, serum Na = 123 mmol/L  | No, unclear                              | Yes, olanzapine, lorazepam                                                                   | Yes, psychiatric symptoms improved            | Yes, 8 months | Yes, adequate detail provided                             | 7 |
| Wicke et al. 2017      | Yes, patient presented to ICU with hyponatraemia                                             | Yes, patient was assumed to have consumed excessive amounts of water due to psychogenic polydipsia | Yes, serum Na = 102 mmol/L  | Yes, venlafaxine, opipramole             | No                                                                                           | No                                            | No            | Yes, adequate detail provided                             | 5 |
| Noakes et al. 2001     | Yes, patient presented to hospital with hyponatraemia due to excess water intake             | Yes, patient consumed around 15 L of fluids over ~10 hrs                                           | Yes, serum Na = 123 mmol/L  | No                                       | No                                                                                           | No                                            | No            | Yes, adequate detail provided                             | 4 |
| Kathol et al. 1985     | Yes, patients presented to hospital with hyponatraemia due to excess water intake            | Yes, patients drank ~11 L of water/day                                                             | Yes, serum Na = ~123 mmol/L | Yes, propranolol, thiothixene            | Yes, discontinuation of thiothixene. Trialled on demeclocycline, captopril, haloperidol      | No                                            | Yes, 1 yr     | Yes, adequate detail provided                             | 7 |
| Lyster et al. 1994     | Yes, patients were identified as having experienced hyponatraemia due to excess water intake | Yes, patients drank excessive amounts of water                                                     | Yes, serum Na = 119 mmol/L  | Yes, chlorpromazine                      | Yes, clozapine                                                                               | Yes, hyponatraemia and symptoms both improved | No, unclear   | Yes, adequate detail provided                             | 7 |
| Worthley 1975          | Yes, patient suffered a seizure due to hyponatraemia                                         | Yes, patient drank excessive amounts of water due to not being able to smoke                       | Yes, serum Na = 97 mmol/L   | No                                       | No                                                                                           | No                                            | No            | Yes, adequate detail provided                             | 4 |
| Dubin et al. 2016      | Yes, patient was admitted with hyponatraemia due to excess water intake                      | Yes, patient drank excessive amounts of water                                                      | Yes, serum Na = 110 mmol/L  | Yes, zuclopenthixol, olanzapine          | No                                                                                           | No                                            | No            | Yes, adequate detail provided                             | 5 |
| Wicki et al. 1998      | Yes, patient was admitted with hyponatraemia due to excess water intake                      | Yes, patient was a compulsive water drinker                                                        | Yes, serum Na = 120 mmol/L  | Yes, clozapine                           | Yes, clozapine withheld and replaced with haloperidol. Clozapine then restarted on day 10    | Yes, hyponatraemia and symptoms both resolved | Yes, 19 days  | Yes, adequate detail provided                             | 8 |
| Zaidi 2005             | Yes, patient was admitted to hospital following a hyponatraemia-induced seizure              | Yes, patient drank excessive amounts of water                                                      | Yes, serum Na = 112 mmol/L  | Yes, ziprasidone                         | Yes, ziprasidone withheld and replaced with haloperidol. Ziprasidone then restarted later on | Yes, psychiatric symptoms improved            | Yes, 8 days   | Yes, adequate detail provided                             | 8 |
| Allon et al. 1990      | Yes, patients presented to hospital with hyponatraemia due to excess water intake            | Yes, patients drank excessive amounts of water                                                     | Yes, serum Na = ~109 mmol/L | Yes, loxapine                            | Yes, loxapine discontinued and then restarted                                                | Yes, hyponatraemia and symptoms both resolved | Yes, 6 days   | Yes, adequate detail provided                             | 8 |
| Ripley et al. 1989     | Yes, patients all experienced hyponatraemia due to excess water intake                       | Yes, patients drank around 5-10 L of water/day                                                     | Yes, serum Na = ~120 mmol/L | No, unclear                              | No                                                                                           | No                                            | No            | No, limited detail regarding treatment types and outcomes | 3 |
| Armstrong et al. 1993  | Yes, patient presented to hospital with hyponatraemia due to excess water intake             | Yes, patient drank ad libitum in a hot environment and became hyperhydrated                        | Yes, serum Na = 122 mmol/L  | No                                       | No                                                                                           | No                                            | No            | Yes, adequate detail provided                             | 4 |
| Woodard et al. 1992    | Yes, patient presented to hospital with hyponatraemia due to excess water intake             | Yes, patient drank gallons of water/day                                                            | Yes, serum Na = 114 mmol/L  | Yes, hydrochlorothiazide                 | Yes, hydrochlorothiazide discontinued                                                        | Yes, hyponatraemia resolved                   | No            | Yes, adequate detail provided                             | 7 |
| Takagi et al. 2011     | Yes, patients all experienced hyponatraemia due to excess fluid intake                       | Yes, patients drank excessive amounts of fluid                                                     | Yes, serum Na = ~129 mmol/L | No, unclear                              | No                                                                                           | No                                            | No            | Yes, adequate detail provided                             | 4 |
| Friedman et al. 1983   | Yes, patient experienced hyponatraemia due to excess water intake                            | Yes, patient drank 4 L of water/day for a week and then 30-40 glasses over 5 hrs                   | Yes, serum Na = 117 mmol/L  | No                                       | No                                                                                           | No                                            | Yes, 3 months | Yes, adequate detail provided                             | 5 |
